# Supplementary material for: Analysis of the occupancy rates of İstanbul Dams and optimum water management strategies against climate change effects
Source: PeerJ. 2025 Sep 16;13:e20041. doi: 10.7717/peerj.20041 (PMC12447953; doi:10.7717/peerj.20041)
Supplement: Supplemental Information 1 [file peerj-13-20041-s001.xlsx]

## Sheet: Worksheet
Date	Omerli	Darlik	Elmali	Terkos	Alibey	Buyukcekmece	Sazlidere	Kazandere	Pabucdere	Istrancalar
2000-10-23	0.652551	0.750151	0.789792	0.708568	0	0.521442	0.505489	0.0574987	0.068553	0.110953
2000-10-24	0.659731	0.773031	0.817187	0.710344	0	0.521442	0.506952	0.0574987	0.069092	0.0772258
2000-10-25	0.663327	0.787929	0.826667	0.708568	0	0.519666	0.506952	0.0574987	0.0693615	0.105593
2000-10-26	0.662608	0.79325	0.828125	0.706792	0	0.517889	0.506952	0.0574987	0.0696239	0.114171
2000-10-27	0.66045	0.795911	0.828125	0.706792	0	0.516113	0.505489	0.0574987	0.0666667	0.114017
2000-10-28	0.659012	0.795911	0.828125	0.703239	0	0.514336	0.505489	0.0574987	0.0666667	0.121929
2000-10-29	0.656854	0.800167	0.826667	0.699698	0	0.51256	0.504818	0.0574987	0.0666667	0.128855
2000-10-30	0.653984	0.800167	0.826667	0.696169	0	0.510783	0.504148	0.0574987	0.0666667	0.133654
2000-10-31	0.652551	0.800699	0.826667	0.690875	0	0.509007	0.504148	0.0574987	0.0666667	0.138413
2000-11-01	0.648967	0.801232	0.822292	0.687345	0	0.50723	0.504148	0.059352	0.0666667	0.144577
2000-11-02	0.646826	0.801232	0.823021	0.683816	0	0.50723	0.504818	0.0634379	0.0666667	0.14924
2000-11-03	0.644684	0.801232	0.82375	0.68031	0	0.505454	0.503477	0.0598154	0.0666667	0.153048
2000-11-04	0.641829	0.802296	0.818646	0.676804	0	0.505454	0.503477	0.0574987	0.0666667	0.153736
2000-11-05	0.638984	0.802828	0.815729	0.673298	0	0.503677	0.503477	0.0574987	0.0666667	0.163626
2000-11-06	0.635428	0.80336	0.815729	0.669792	0	0.501901	0.502806	0.0574987	0.0666667	0.164281
2000-11-07	0.634009	0.800699	0.817187	0.666287	0	0.500124	0.502806	0.0574987	0.0666667	0.161286
2000-11-08	0.632592	0.796975	0.812813	0.662806	0	0.500124	0.502806	0.0595837	0.0666667	0.178433
2000-11-09	0.631176	0.793782	0.812813	0.659326	0.00820666	0.498348	0.500124	0.0699249	0.0666667	0.181738
2000-11-10	0.629051	0.79059	0.806979	0.655845	0.00899159	0.496573	0.498782	0.0826669	0.0666667	0.184742
2000-11-11	0.628343	0.787929	0.806979	0.652365	0.0128811	0.494797	0.498782	0.0951647	0.0666667	0.187027
2000-11-12	0.625518	0.787397	0.804792	0.650624	0.0139472	0.493021	0.497013	0.0951647	0.0666667	0.189545
2000-11-13	0.623401	0.786333	0.804063	0.647155	0.0150163	0.498348	0.497013	0.0951647	0.0666667	0.192607
2000-11-14	0.621989	0.783672	0.803333	0.643696	0.0186129	0.489469	0.497013	0.0951647	0.0666667	0.195537
2000-11-15	0.621283	0.779948	0.798958	0.638508	0.0219049	0.487693	0.497013	0.0951647	0.0666667	0.194407
2000-11-16	0.619875	0.776223	0.795312	0.63505	0.0246024	0.485917	0.496129	0.0951647	0.0666667	0.195989
2000-11-17	0.61847	0.773031	0.795312	0.631591	0.0286677	0.484142	0.496129	0.0951647	0.0666667	0.198918
2000-11-18	0.617064	0.769838	0.795312	0.628157	0.0323932	0.482366	0.495245	0.0951647	0.0666667	0.201747
2000-11-19	0.615659	0.767178	0.794583	0.623005	0.035117	0.482366	0.49436	0.0948404	0.0666667	0.204304
2000-11-20	0.613551	0.763453	0.794583	0.617854	0.0379287	0.480589	0.493476	0.0711885	0.0666667	0.20707
2000-11-21	0.61285	0.759728	0.789792	0.614419	0.0408283	0.480589	0.492591	0.0711885	0.0666667	0.209028
2000-11-22	0.61145	0.756536	0.789792	0.61101	0.0437864	0.478813	0.492591	0.0760326	0.0666667	0.212207
2000-11-23	0.61005	0.769306	0.789167	0.605895	0.0461998	0.477036	0.491707	0.0793603	0.0666667	0.214828
2000-11-24	0.608649	0.750151	0.786667	0.60078	0.0474241	0.47526	0.490823	0.0817192	0.0666667	0.23538
2000-11-25	0.607249	0.748022	0.785417	0.599075	0.0499077	0.473483	0.489938	0.078223	0.0666667	0.219341
2000-11-26	0.605852	0.743765	0.783542	0.597371	0.0499077	0.471707	0.489938	0.0745162	0.0666667	0.22495
2000-11-27	0.604457	0.739509	0.783542	0.597371	0.0505462	0.471707	0.489938	0.0793603	0.0666667	0.227993
2000-11-28	0.60376	0.736316	0.783542	0.597371	0.0534253	0.471707	0.489938	0.0574987	0.0666667	0.238519
2000-11-29	0.621989	0.735784	0.807708	0.599075	0.0630583	0.47526	0.490823	0.0574987	0.0666667	0.253277
2000-11-30	0.649684	0.769838	0.835417	0.599075	0.0729696	0.47526	0.48416	0.0574987	0.0666667	0.220368
2000-12-01	0.655418	0.778351	0.857292	0.595677	0.0773804	0.473483	0.478618	0.0574987	0.0666667	0.172272
2000-12-02	0.656854	0.781012	0.857292	0.593984	0.0807545	0.471707	0.477085	0.0574987	0.0666667	0.12732
2000-12-03	0.657573	0.779948	0.844167	0.592291	0.0826641	0.471707	0.476318	0.0574987	0.0666667	0.104144
2000-12-04	0.656854	0.779416	0.84125	0.590598	0.0865243	0.46993	0.475552	0.0574987	0.0666667	0.0764685
2000-12-05	0.656854	0.777819	0.839063	0.587212	0.0892599	0.468154	0.475552	0.0574987	0.0666667	0.0654974
2000-12-06	0.656134	0.775691	0.822292	0.583825	0.0916498	0.466377	0.475552	0.0574987	0.0666667	0.0660732
2000-12-07	0.655418	0.773031	0.813542	0.582132	0.0948804	0.464601	0.474785	0.0574987	0.0666667	0.0639218
2000-12-08	0.654701	0.771434	0.799687	0.577076	0.0989661	0.464601	0.474785	0.0574987	0.0666667	0.0690738
2000-12-09	0.653984	0.769838	0.803333	0.575395	0.102703	0.464601	0.474019	0.0574987	0.0837234	0.0900278
2000-12-10	0.652551	0.768774	0.804063	0.572032	0.105234	0.462824	0.474019	0.0574987	0.0674751	0.0986968
2000-12-11	0.651834	0.765581	0.802604	0.568669	0.1078	0.462824	0.474019	0.0574987	0.0677446	0.105509
2000-12-12	0.652551	0.762921	0.80625	0.565306	0.111244	0.462824	0.474019	0.0574987	0.0680141	0.111417
2000-12-13	0.656134	0.765581	0.808438	0.563624	0.116498	0.461048	0.501465	0.0574987	0.0682835	0.144772
2000-12-14	0.657573	0.765049	0.809167	0.560286	0.120508	0.461048	0.502806	0.0574987	0.068553	0.122326
2000-12-15	0.656854	0.762921	0.809896	0.556948	0.124119	0.459271	0.501465	0.0574987	0.068553	0.126721
2000-12-16	0.656854	0.761857	0.809167	0.55361	0.127777	0.457494	0.500794	0.0574987	0.068553	0.131853
2000-12-17	0.657573	0.76026	0.813542	0.550272	0.133802	0.459271	0.499453	0.0674396	0.0688225	0.170209
2000-12-18	0.656854	0.761325	0.812813	0.546933	0.137106	0.457494	0.474019	0.0745162	0.0696239	0.178335
2000-12-19	0.656854	0.758664	0.814271	0.543618	0.140902	0.457494	0.477851	0.0765802	0.0696239	0.184132
2000-12-20	0.659012	0.761857	0.815	0.540304	0.143309	0.457494	0.477851	0.0820351	0.0704112	0.190028
2000-12-21	0.667661	0.769306	0.853646	0.538646	0.15605	0.457494	0.478618	0.0820351	0.070936	0.201891
2000-12-22	0.671275	0.774627	0.865417	0.538646	0.161597	0.457494	0.480917	0.0808346	0.0714609	0.21083
2000-12-23	0.674176	0.776755	0.902083	0.536989	0.16773	0.459271	0.483335	0.0581937	0.0719857	0.214554
2000-12-24	0.677802	0.778351	0.902083	0.540304	0.198137	0.464601	0.522439	0.0574987	0.07227	0.207682
2000-12-25	0.681441	0.782076	0.867083	0.540304	0.204827	0.466377	0.523293	0.0574987	0.0725543	0.190293
2000-12-26	0.682169	0.78048	0.875417	0.540304	0.205951	0.466377	0.525	0.0574987	0.0725543	0.1912
2000-12-27	0.682169	0.78048	0.87625	0.540304	0.215614	0.468154	0.525	0.0574987	0.0725543	0.181921
2000-12-28	0.682169	0.778351	0.872083	0.538646	0.226635	0.468154	0.526707	0.0574987	0.0731229	0.175623
2000-12-29	0.682897	0.778351	0.877083	0.538646	0.231345	0.466377	0.526707	0.0574987	0.0739758	0.179333
2000-12-30	0.682897	0.776755	0.864583	0.535331	0.231933	0.468154	0.526707	0.0574987	0.0742601	0.178102
2000-12-31	0.682897	0.773031	0.864583	0.535331	0.2433	0.468154	0.526707	0.0574987	0.0748287	0.190124
2001-01-01	0.682169	0.773031	0.86625	0.533674	0.24695	0.468154	0.528414	0.0574987	0.075441	0.198719
2001-01-02	0.682169	0.770902	0.85875	0.533674	0.254313	0.468154	0.530182	0.0574987	0.0763595	0.205806
2001-01-03	0.680713	0.769306	0.860208	0.533674	0.258021	0.466377	0.530182	0.057962	0.0769718	0.213373
2001-01-04	0.680713	0.767178	0.860938	0.530359	0.261764	0.466377	0.531097	0.059352	0.077278	0.220365
2001-01-05	0.680713	0.765049	0.858021	0.527068	0.26616	0.464601	0.531097	0.058657	0.0778903	0.251834
2001-01-06	0.679986	0.762921	0.85875	0.525422	0.269308	0.464601	0.532011	0.0574987	0.0782184	0.205812
2001-01-07	0.67853	0.760792	0.85875	0.522131	0.273122	0.462824	0.532926	0.0574987	0.0782184	0.215893
2001-01-08	0.677802	0.758664	0.857292	0.520485	0.277597	0.462824	0.531097	0.0574987	0.0785464	0.198447
2001-01-09	0.677077	0.755472	0.854375	0.518839	0.280175	0.461048	0.530182	0.0574987	0.0788744	0.178887
2001-01-10	0.676352	0.753343	0.857292	0.518839	0.276308	0.461048	0.528414	0.0574987	0.0798585	0.174335
2001-01-11	0.675627	0.752811	0.857292	0.517194	0.272486	0.459271	0.525853	0.0574987	0.0808426	0.183409
2001-01-12	0.674176	0.749619	0.853646	0.515548	0.274393	0.457494	0.526707	0.0574987	0.0811707	0.1913
2001-01-13	0.672726	0.745894	0.853646	0.513902	0.277597	0.457494	0.525853	0.0574987	0.0811707	0.212854
2001-01-14	0.672	0.744298	0.855104	0.515548	0.280819	0.457494	0.525853	0.0574987	0.0832128	0.231067
2001-01-15	0.674176	0.745362	0.889583	0.523776	0.293858	0.461048	0.532011	0.0574987	0.0892233	0.314355
2001-01-16	0.67853	0.756004	0.851458	0.555279	0.313233	0.471707	0.536584	0.0680293	0.100641	0.547896
2001-01-17	0.687271	0.771966	0.864583	0.578758	0.342999	0.484142	0.541185	0.0826669	0.116768	0.679875
2001-01-18	0.690923	0.78048	0.877083	0.592291	0.357262	0.493021	0.547609	0.104345	0.130157	0.711181
2001-01-19	0.693117	0.790058	0.870417	0.60078	0.368143	0.496573	0.548364	0.121493	0.138931	0.706826
2001-01-20	0.695317	0.800699	0.874583	0.605895	0.378432	0.500124	0.551388	0.117071	0.147934	0.698929
2001-01-21	0.69605	0.804956	0.882083	0.614419	0.391108	0.501901	0.565495	0.115681	0.151495	0.626425
2001-01-22	0.696783	0.807617	0.88125	0.617854	0.403192	0.505454	0.566377	0.109674	0.154628	0.683125
2001-01-23	0.696783	0.808681	0.877083	0.623005	0.408543	0.50723	0.567259	0.105508	0.157252	0.658827
2001-01-24	0.696783	0.808681	0.877917	0.624722	0.41547	0.509007	0.567259	0.115681	0.159582	0.631249
2001-01-25	0.69605	0.812405	0.88125	0.628157	0.420115	0.510783	0.56814	0.114954	0.163313	0.601556
2001-01-26	0.695317	0.808681	0.882917	0.628157	0.424772	0.510783	0.56814	0.105508	0.165793	0.544318
2001-01-27	0.695317	0.807617	0.882917	0.631591	0.426342	0.510783	0.567259	0.0992422	0.167131	0.472686
2001-01-28	0.694583	0.80602	0.882917	0.631591	0.426342	0.510783	0.56814	0.0902069	0.169166	0.401737
2001-01-29	0.694583	0.804956	0.882917	0.633321	0.426342	0.51256	0.569022	0.102069	0.19288	0.422857
2001-01-30	0.693117	0.803892	0.882917	0.636779	0.424772	0.51256	0.569022	0.13594	0.2291	0.433257
2001-01-31	0.691653	0.802828	0.882917	0.638508	0.42322	0.51256	0.580781	0.151478	0.24969	0.41682
2001-02-01	0.693117	0.800699	0.89125	0.641967	0.420892	0.514336	0.582211	0.158275	0.259527	0.435339
2001-02-02	0.701189	0.803892	0.849271	0.650624	0.431052	0.521442	0.58884	0.164259	0.267942	0.416163
2001-02-03	0.71521	0.810277	0.847812	0.701463	0.473447	0.533878	0.607297	0.208832	0.296485	0.884854
2001-02-04	0.727841	0.824644	0.860938	0.738908	0.505579	0.571178	0.619646	0.248144	0.31022	0.935536
2001-02-05	0.731571	0.828368	0.892083	0.74791	0.5148	0.578518	0.623806	0.254264	0.315686	0.945171
2001-02-06	0.733066	0.831029	0.902083	0.75151	0.524939	0.582188	0.627491	0.257613	0.319068	0.922896
2001-02-07	0.733813	0.832093	0.902083	0.755111	0.527487	0.578518	0.630573	0.263089	0.324452	0.883597
2001-02-08	0.734561	0.832625	0.902083	0.756924	0.528337	0.578518	0.632984	0.265021	0.327152	0.833094
2001-02-09	0.734561	0.832093	0.902083	0.756924	0.530885	0.580353	0.632984	0.265504	0.330062	0.782595
2001-02-10	0.734561	0.831029	0.902083	0.756924	0.538555	0.580353	0.634591	0.268512	0.332657	0.682701
2001-02-11	0.734561	0.829432	0.902083	0.758737	0.537703	0.580353	0.636198	0.268123	0.335391	0.636231
2001-02-12	0.733813	0.827836	0.902083	0.760549	0.539408	0.580353	0.637002	0.267343	0.338757	0.566114
2001-02-13	0.733813	0.82624	0.90625	0.764175	0.541124	0.582188	0.638745	0.270851	0.343841	0.548182
2001-02-14	0.733813	0.824644	0.900417	0.764175	0.543699	0.582188	0.640488	0.274677	0.346471	0.586691
2001-02-15	0.733813	0.824644	0.907917	0.764175	0.545415	0.591362	0.640488	0.278787	0.347658	0.626246
2001-02-16	0.734561	0.825176	0.905417	0.765988	0.552309	0.587693	0.64223	0.283676	0.348053	0.734154
2001-02-17	0.736055	0.829432	0.905417	0.769613	0.555765	0.589528	0.64223	0.288388	0.347262	0.7462
2001-02-18	0.735308	0.829432	0.905417	0.773239	0.560979	0.591362	0.64223	0.292834	0.345419	0.734406
2001-02-19	0.735308	0.832093	0.914583	0.780534	0.564458	0.593197	0.639616	0.296723	0.343316	0.761757
2001-02-20	0.736803	0.834753	0.89375	0.784182	0.569692	0.595032	0.643102	0.30139	0.342264	0.795984
2001-02-21	0.736803	0.835285	0.897083	0.786005	0.570565	0.595032	0.643973	0.304872	0.339248	0.798022
2001-02-22	0.737553	0.834753	0.89875	0.787829	0.575819	0.596867	0.645716	0.308501	0.337285	0.791338
2001-02-23	0.739802	0.833689	0.905417	0.789653	0.577583	0.596867	0.65322	0.311279	0.337776	0.751069
2001-02-24	0.743552	0.839542	0.914583	0.789653	0.584641	0.598702	0.655096	0.314057	0.338267	0.72717
2001-02-25	0.748819	0.850184	0.897917	0.793313	0.590833	0.602372	0.657106	0.327971	0.34023	0.658547
2001-02-26	0.75183	0.853909	0.902083	0.795149	0.595279	0.604207	0.660121	0.339179	0.341738	0.621205
2001-02-27	0.753341	0.853909	0.907083	0.796985	0.594388	0.606042	0.661126	0.344689	0.343316	0.627436
2001-02-28	0.753341	0.855505	0.91125	0.811686	0.596169	0.609712	0.665146	0.339179	0.344893	0.642372
2001-03-01	0.753341	0.854973	0.915417	0.815382	0.597059	0.613382	0.667478	0.335701	0.346471	0.610969
2001-03-02	0.757873	0.857101	0.897083	0.822774	0.605102	0.618886	0.672918	0.33802	0.348053	0.626969
2001-03-03	0.762418	0.859762	0.90125	0.826469	0.611382	0.622556	0.678006	0.335121	0.348845	0.639934
2001-03-04	0.763176	0.859762	0.902917	0.830177	0.614079	0.626226	0.680549	0.331758	0.34924	0.650484
2001-03-05	0.763176	0.85923	0.879583	0.830177	0.615877	0.626226	0.681397	0.330135	0.350427	0.653545
2001-03-06	0.763934	0.858698	0.90625	0.830177	0.617676	0.626226	0.684153	0.327971	0.350858	0.651712
2001-03-07	0.76621	0.858698	0.914583	0.835758	0.617676	0.629896	0.686909	0.326464	0.360424	0.697703
2001-03-08	0.76621	0.859762	0.899583	0.843199	0.628565	0.633566	0.688746	0.329053	0.376419	0.755351
2001-03-09	0.766968	0.85923	0.902917	0.843199	0.632209	0.633566	0.690583	0.331217	0.385468	0.769004
2001-03-10	0.766968	0.85923	0.90625	0.845059	0.63403	0.633566	0.69454	0.333961	0.391726	0.759533
2001-03-11	0.766968	0.858698	0.90625	0.845059	0.634941	0.633566	0.695529	0.33686	0.396408	0.732251
2001-03-12	0.766968	0.858166	0.910417	0.845059	0.636763	0.633566	0.69454	0.339179	0.399109	0.703273
2001-03-13	0.76621	0.857634	0.912917	0.845059	0.63768	0.635401	0.695529	0.344689	0.40266	0.655844
2001-03-14	0.76621	0.856569	0.91125	0.845059	0.638596	0.635401	0.697507	0.347695	0.404735	0.610535
2001-03-15	0.766968	0.853377	0.914583	0.848791	0.64043	0.637236	0.699486	0.352654	0.407502	0.581844
2001-03-16	0.765451	0.853377	0.920417	0.848791	0.64043	0.637236	0.700475	0.35591	0.410915	0.551749
2001-03-17	0.76621	0.851248	0.912917	0.850663	0.642263	0.637236	0.701535	0.357213	0.412114	0.513521
2001-03-18	0.765451	0.84912	0.912917	0.852535	0.642263	0.637236	0.706834	0.359317	0.413913	0.499998
2001-03-19	0.764693	0.847524	0.914583	0.852535	0.642263	0.637236	0.702595	0.360018	0.415711	0.496443
2001-03-20	0.763934	0.845395	0.914583	0.852535	0.642263	0.637236	0.702595	0.358615	0.417002	0.477588
2001-03-21	0.763176	0.843799	0.914583	0.852535	0.642263	0.635401	0.702595	0.356562	0.420876	0.463313
2001-03-22	0.762418	0.841138	0.914583	0.850663	0.642263	0.635401	0.704714	0.367983	0.422168	0.404548
2001-03-23	0.760901	0.837946	0.920417	0.852535	0.64318	0.635401	0.705774	0.377851	0.424935	0.411227
2001-03-24	0.76849	0.852845	0.90875	0.852535	0.642263	0.637236	0.703655	0.386518	0.428393	0.360796
2001-03-25	0.770012	0.856037	0.910417	0.852535	0.64318	0.637236	0.700475	0.37725	0.428393	0.381523
2001-03-26	0.76849	0.856037	0.91125	0.850663	0.642263	0.635401	0.701535	0.380857	0.428393	0.388512
2001-03-27	0.76849	0.855505	0.91125	0.850663	0.641347	0.637236	0.701535	0.374495	0.430124	0.385815
2001-03-28	0.769251	0.854441	0.910417	0.848791	0.627654	0.635401	0.700475	0.370237	0.432201	0.39011
2001-03-29	0.76849	0.853909	0.912917	0.848791	0.614978	0.633566	0.698496	0.367983	0.43376	0.384471
2001-03-30	0.766968	0.852312	0.912917	0.848791	0.614978	0.631731	0.697507	0.365729	0.435979	0.383407
2001-03-31	0.766968	0.850716	0.912917	0.846919	0.615877	0.631731	0.699486	0.364226	0.436545	0.350339
2001-04-01	0.765451	0.848588	0.91125	0.843199	0.618575	0.629896	0.69454	0.362823	0.437678	0.391627
2001-04-02	0.764693	0.846459	0.91125	0.843199	0.618575	0.629896	0.69454	0.361421	0.439945	0.399449
2001-04-03	0.764693	0.844331	0.909583	0.841339	0.618575	0.628061	0.69454	0.360018	0.440559	0.419493
2001-04-04	0.763934	0.843267	0.91125	0.839478	0.617676	0.628061	0.69454	0.353957	0.441172	0.429172
2001-04-05	0.762418	0.844331	0.91125	0.839478	0.618575	0.626226	0.692561	0.347695	0.4424	0.438542
2001-04-06	0.759384	0.844863	0.91125	0.835758	0.618575	0.626226	0.69454	0.341934	0.4424	0.447682
2001-04-07	0.757118	0.846991	0.91125	0.835758	0.618575	0.624391	0.69454	0.33802	0.443628	0.457878
2001-04-08	0.754096	0.847524	0.907917	0.833898	0.618575	0.622556	0.69454	0.332841	0.444241	0.4361
2001-04-09	0.752585	0.849652	0.907917	0.833898	0.618575	0.622556	0.69454	0.331758	0.444241	0.426693
2001-04-10	0.749572	0.851248	0.907917	0.832038	0.616776	0.620721	0.69454	0.330676	0.445469	0.416746
2001-04-11	0.74656	0.852845	0.90625	0.832038	0.615877	0.620721	0.69454	0.327971	0.448066	0.405479
2001-04-12	0.745054	0.850716	0.90625	0.832038	0.614079	0.620721	0.695529	0.33628	0.449388	0.401655
2001-04-13	0.743552	0.847524	0.90625	0.832038	0.61318	0.620721	0.695529	0.33802	0.45071	0.391652
2001-04-14	0.745054	0.846459	0.91375	0.830177	0.612281	0.622556	0.697507	0.340832	0.452693	0.389405
2001-04-15	0.743552	0.845927	0.91375	0.830177	0.612281	0.622556	0.695529	0.33802	0.456942	0.370027
2001-04-16	0.744302	0.844863	0.92875	0.830177	0.612281	0.626226	0.696518	0.341934	0.459775	0.357886
2001-04-17	0.745054	0.844331	0.912917	0.835758	0.612281	0.628061	0.697507	0.347695	0.466249	0.350527
2001-04-18	0.745807	0.842203	0.912917	0.835758	0.612281	0.626226	0.697507	0.352003	0.467989	0.330214
2001-04-19	0.748066	0.844863	0.917083	0.837618	0.61318	0.633566	0.699486	0.350701	0.470308	0.301146
2001-04-20	0.748819	0.846991	0.907917	0.837618	0.615877	0.633566	0.699486	0.360719	0.472144	0.271022
2001-04-21	0.748066	0.846459	0.902083	0.837618	0.615877	0.633566	0.701535	0.358615	0.4734	0.223537
2001-04-22	0.748819	0.844863	0.902083	0.837618	0.617676	0.633566	0.701535	0.355259	0.47654	0.187023
2001-04-23	0.748819	0.844863	0.90375	0.837618	0.618575	0.633566	0.700475	0.353957	0.479197	0.146603
2001-04-24	0.748819	0.844331	0.91125	0.837618	0.618575	0.635401	0.702595	0.35591	0.484657	0.128644
2001-04-25	0.748066	0.842735	0.912083	0.839478	0.628565	0.635401	0.704714	0.352003	0.486831	0.145573
2001-04-26	0.748066	0.841138	0.912917	0.839478	0.632209	0.635401	0.705774	0.348296	0.48828	0.15996
2001-04-27	0.74656	0.839542	0.912917	0.837618	0.63312	0.635401	0.706834	0.344689	0.491179	0.172188
2001-04-28	0.745807	0.837414	0.912917	0.835758	0.63312	0.633566	0.706834	0.341934	0.492266	0.182697
2001-04-29	0.743552	0.834753	0.91125	0.835758	0.632209	0.633566	0.708954	0.339179	0.493353	0.187197
2001-04-30	0.742802	0.831561	0.91125	0.833898	0.631298	0.631731	0.704714	0.335701	0.49444	0.192189
2001-05-01	0.741302	0.829432	0.91125	0.832038	0.631298	0.631731	0.704714	0.333382	0.495527	0.191174
2001-05-02	0.739802	0.826772	0.91125	0.830177	0.632209	0.631731	0.701535	0.330135	0.496614	0.193295
2001-05-03	0.738303	0.824644	0.91125	0.830177	0.632209	0.629896	0.700475	0.327971	0.4978	0.195982
2001-05-04	0.736803	0.820919	0.90625	0.828317	0.632209	0.628061	0.700475	0.323449	0.498393	0.199959
2001-05-05	0.736055	0.819323	0.90625	0.826469	0.632209	0.626226	0.699486	0.322946	0.498393	0.200457
2001-05-06	0.733813	0.81613	0.90625	0.824621	0.628565	0.624391	0.698496	0.320627	0.4978	0.210222
2001-05-07	0.734561	0.812937	0.917917	0.828317	0.628565	0.628061	0.700475	0.3197	0.499579	0.230116
2001-05-08	0.734561	0.810809	0.917917	0.828317	0.629476	0.628061	0.699486	0.317458	0.503186	0.259537
2001-05-09	0.733066	0.808681	0.91875	0.826469	0.630387	0.628061	0.698496	0.305909	0.503186	0.26983
2001-05-10	0.732319	0.806552	0.91375	0.826469	0.631298	0.626226	0.695529	0.303316	0.499579	0.278589
2001-05-11	0.730077	0.803892	0.91375	0.822774	0.631298	0.624391	0.695529	0.300908	0.506398	0.282533
2001-05-12	0.729329	0.801232	0.907917	0.819078	0.631298	0.622556	0.69454	0.300908	0.506398	0.291876
2001-05-13	0.728585	0.798039	0.907917	0.81723	0.630387	0.622556	0.69355	0.296279	0.50704	0.301728
2001-05-14	0.726352	0.795378	0.907083	0.813534	0.627654	0.620721	0.690583	0.292426	0.508325	0.313756
2001-05-15	0.724863	0.792186	0.905417	0.811686	0.627654	0.618886	0.689664	0.289982	0.508967	0.325077
2001-05-16	0.724119	0.789525	0.905417	0.808002	0.626746	0.617051	0.688746	0.286793	0.508967	0.320375
2001-05-17	0.721886	0.786333	0.902917	0.806166	0.625838	0.615217	0.687827	0.28318	0.509659	0.303367
2001-05-18	0.721144	0.78314	0.902917	0.806166	0.62493	0.615217	0.686909	0.279708	0.509659	0.292834
2001-05-19	0.720402	0.779416	0.89875	0.802494	0.62493	0.613382	0.685071	0.276944	0.509659	0.285391
2001-05-20	0.720402	0.775691	0.897083	0.800658	0.619483	0.611547	0.685071	0.273827	0.509659	0.279643
2001-05-21	0.716693	0.773563	0.899583	0.800658	0.618575	0.609712	0.684153	0.270851	0.511734	0.268687
2001-05-22	0.714468	0.77037	0.897083	0.800658	0.617676	0.607877	0.682316	0.267733	0.511734	0.257157
2001-05-23	0.713729	0.767178	0.897083	0.798822	0.614079	0.606042	0.682316	0.264055	0.511043	0.249807
2001-05-24	0.712251	0.763985	0.892083	0.796985	0.614079	0.604207	0.680549	0.257613	0.51381	0.247747
2001-05-25	0.710035	0.76026	0.892083	0.796985	0.612281	0.600537	0.678006	0.246019	0.514501	0.237676
2001-05-26	0.709296	0.756536	0.890417	0.795149	0.609583	0.596867	0.67631	0.236678	0.514501	0.234586
2001-05-27	0.706343	0.753875	0.890417	0.793313	0.608687	0.595032	0.674614	0.218155	0.514501	0.238565
2001-05-28	0.701925	0.749619	0.889583	0.791477	0.605102	0.593197	0.672918	0.200085	0.514501	0.24412
2001-05-29	0.701189	0.746958	0.880417	0.787829	0.604206	0.589528	0.672918	0.197127	0.513118	0.247319
2001-05-30	0.701925	0.742701	0.880417	0.784182	0.601517	0.587693	0.672918	0.180663	0.511043	0.24998
2001-05-31	0.696783	0.739509	0.879583	0.77871	0.599731	0.585858	0.670587	0.166228	0.507683	0.25379
2001-06-01	0.693117	0.736316	0.872917	0.780534	0.599731	0.584023	0.669809	0.145231	0.50704	0.256126
2001-06-02	0.692384	0.732059	0.872917	0.77871	0.595279	0.582188	0.667478	0.128891	0.50704	0.258284
2001-06-03	0.690923	0.728335	0.872083	0.776886	0.593498	0.580353	0.665923	0.128069	0.505756	0.256992
2001-06-04	0.689462	0.725142	0.87125	0.775062	0.592608	0.576683	0.663136	0.104055	0.508967	0.260637
2001-06-05	0.688001	0.719821	0.863125	0.771426	0.58641	0.573013	0.660121	0.0861526	0.508967	0.264085
2001-06-06	0.686541	0.716629	0.861667	0.769613	0.582872	0.571178	0.657106	0.0861526	0.508967	0.265949
2001-06-07	0.68508	0.713436	0.860938	0.765988	0.582872	0.567625	0.654158	0.0574987	0.508325	0.26845
2001-06-08	0.681441	0.71184	0.854375	0.762362	0.578464	0.565849	0.65322	0.0574987	0.507683	0.271681
2001-06-09	0.680713	0.704923	0.855833	0.760549	0.575819	0.564072	0.650406	0.0574987	0.507683	0.243614
2001-06-10	0.679258	0.701198	0.853646	0.760549	0.569692	0.560519	0.647592	0.0574987	0.508325	0.212981
2001-06-11	0.677802	0.697473	0.852917	0.758737	0.567947	0.558743	0.645716	0.0574987	0.507683	0.180262
2001-06-12	0.675627	0.693749	0.847083	0.755111	0.563588	0.55519	0.644844	0.0574987	0.506398	0.174306
2001-06-13	0.672726	0.690024	0.847083	0.753311	0.558369	0.553413	0.643973	0.0574987	0.505113	0.177515
2001-06-14	0.671275	0.6863	0.846354	0.75151	0.555765	0.549861	0.640488	0.0574987	0.504471	0.179886
2001-06-15	0.669828	0.682043	0.836875	0.74791	0.552309	0.54631	0.637873	0.0574987	0.503828	0.183325
2001-06-16	0.667661	0.679382	0.836146	0.744309	0.551445	0.542758	0.635395	0.0574987	0.504471	0.187597
2001-06-17	0.666216	0.675126	0.831042	0.740708	0.550581	0.539206	0.632984	0.0574987	0.504471	0.19114
2001-06-18	0.663327	0.671401	0.830313	0.737107	0.547989	0.53743	0.630573	0.0574987	0.503828	0.194639
2001-06-19	0.661169	0.667676	0.825937	0.733531	0.546273	0.533878	0.628965	0.0574987	0.503828	0.1967
2001-06-20	0.659012	0.667676	0.825937	0.728167	0.543699	0.532102	0.626754	0.0574987	0.503828	0.199436
2001-06-21	0.656134	0.667676	0.824479	0.728167	0.539408	0.530325	0.62528	0.0577303	0.501951	0.208145
2001-06-22	0.653267	0.665548	0.819375	0.726379	0.534294	0.528549	0.623806	0.0591204	0.501358	0.213657
2001-06-23	0.6504	0.661291	0.819375	0.722802	0.532589	0.526772	0.622332	0.0608263	0.500765	0.216925
2001-06-24	0.647539	0.658099	0.813542	0.719226	0.529186	0.523219	0.619646	0.0623427	0.500172	0.219557
2001-06-25	0.646112	0.653842	0.812813	0.715674	0.528337	0.519666	0.616721	0.0634379	0.500172	0.222643
2001-06-26	0.643971	0.648521	0.809896	0.712121	0.524939	0.517889	0.613796	0.0645331	0.500172	0.220783
2001-06-27	0.641118	0.646393	0.807708	0.708568	0.521548	0.514336	0.610937	0.0653756	0.500172	0.228871
2001-06-28	0.638984	0.644796	0.806979	0.705015	0.5148	0.51256	0.608207	0.066555	0.498986	0.221575
2001-06-29	0.634717	0.642136	0.801146	0.703239	0.499757	0.509007	0.602748	0.0677345	0.498986	0.235528
2001-06-30	0.633301	0.638411	0.800417	0.703239	0.484082	0.50723	0.599368	0.0689771	0.498393	0.239366
2001-07-01	0.629759	0.634687	0.796042	0.701463	0.471007	0.503677	0.597679	0.0699249	0.496614	0.241925
2001-07-02	0.628343	0.63109	0.795312	0.699698	0.459684	0.500124	0.595989	0.0702408	0.496614	0.243948
2001-07-03	0.626223	0.628154	0.795312	0.697933	0.442094	0.496573	0.593519	0.0711885	0.496614	0.245176
2001-07-04	0.624812	0.626316	0.789167	0.696169	0.434985	0.493021	0.5904	0.0721152	0.496614	0.247208
2001-07-05	0.624106	0.623377	0.788542	0.692639	0.424772	0.489469	0.5865	0.0728103	0.496071	0.248957
2001-07-06	0.621989	0.620805	0.783542	0.690875	0.4147	0.485917	0.585785	0.0735053	0.494984	0.249302
2001-07-07	0.619875	0.6186	0.783542	0.687345	0.403192	0.482366	0.58507	0.0740107	0.493897	0.251957
2001-07-08	0.617767	0.616028	0.781042	0.685581	0.394107	0.478813	0.582926	0.0745162	0.492266	0.254626
2001-07-09	0.615659	0.613456	0.780417	0.683816	0.386609	0.47526	0.580781	0.0752744	0.493353	0.256664
2001-07-10	0.613551	0.610516	0.772917	0.682063	0.378432	0.471707	0.577462	0.0757799	0.49281	0.258584
2001-07-11	0.61145	0.607944	0.772292	0.678557	0.371789	0.46993	0.574627	0.0763064	0.49281	0.260685
2001-07-12	0.609349	0.605004	0.771667	0.675051	0.364496	0.466377	0.571793	0.076854	0.491179	0.263167
2001-07-13	0.607249	0.602065	0.766667	0.671545	0.357262	0.462824	0.569022	0.0774016	0.490454	0.264881
2001-07-14	0.605154	0.599125	0.766042	0.66804	0.350086	0.461048	0.566377	0.0779492	0.491179	0.265076
2001-07-15	0.603063	0.596553	0.766042	0.666287	0.347251	0.459271	0.56285	0.0784968	0.497207	0.267498
2001-07-16	0.600971	0.593613	0.765417	0.662806	0.338078	0.455718	0.560268	0.0784968	0.497207	0.268713
2001-07-17	0.598882	0.593613	0.764792	0.659326	0.331787	0.453941	0.556993	0.0793603	0.498393	0.26984
2001-07-18	0.595409	0.591409	0.762917	0.655845	0.330393	0.450388	0.553718	0.07995	0.496071	0.270894
2001-07-19	0.59263	0.588469	0.756667	0.655845	0.323469	0.446835	0.551388	0.0802449	0.49281	0.271827
2001-07-20	0.591138	0.585529	0.756042	0.652365	0.31731	0.443282	0.548364	0.0808346	0.496071	0.272991
2001-07-21	0.589645	0.582957	0.756042	0.648884	0.308497	0.439729	0.545341	0.0811295	0.49281	0.273046
2001-07-22	0.588153	0.580018	0.756042	0.645426	0.29848	0.436176	0.544649	0.0817192	0.484657	0.273965
2001-07-23	0.585007	0.577446	0.752917	0.641967	0.294514	0.432623	0.541185	0.082351	0.491179	0.274646
2001-07-24	0.582358	0.574873	0.751667	0.638508	0.289922	0.42907	0.539799	0.0826669	0.491179	0.27442
2001-07-25	0.580592	0.571934	0.748542	0.63505	0.287959	0.425518	0.537499	0.0832988	0.490454	0.275933
2001-07-26	0.57814	0.569362	0.742917	0.641967	0.286659	0.421967	0.536584	0.0839306	0.48973	0.275576
2001-07-27	0.575396	0.567157	0.742917	0.629874	0.286009	0.418415	0.532926	0.0845625	0.49281	0.275825
2001-07-28	0.572651	0.56532	0.721042	0.624722	0.284058	0.414863	0.532926	0.0851332	0.492266	0.28287
2001-07-29	0.569914	0.562748	0.716667	0.621288	0.282108	0.411312	0.529268	0.0853881	0.491723	0.276144
2001-07-30	0.568547	0.559808	0.715417	0.617854	0.280175	0.407759	0.526707	0.0856429	0.491723	0.276661
2001-07-31	0.566496	0.556868	0.708542	0.614419	0.278242	0.404206	0.525	0.0858977	0.491179	0.277271
2001-08-01	0.564448	0.554296	0.708542	0.609305	0.276308	0.400653	0.521585	0.0861526	0.490454	0.277759
2001-08-02	0.561726	0.552459	0.707917	0.602485	0.273757	0.3971	0.519147	0.0864074	0.48973	0.277898
2001-08-03	0.560365	0.550254	0.699167	0.599075	0.271215	0.393547	0.516769	0.0869171	0.484657	0.286702
2001-08-04	0.558323	0.548049	0.699167	0.592291	0.269944	0.391864	0.515184	0.0871719	0.484657	0.286702
2001-08-05	0.55629	0.544742	0.699167	0.587212	0.269944	0.390181	0.515184	0.0874268	0.486831	0.286995
2001-08-06	0.554257	0.541803	0.694167	0.582132	0.269308	0.386816	0.513598	0.0877048	0.487556	0.286814
2001-08-07	0.552902	0.5407	0.694167	0.577076	0.269308	0.383451	0.512806	0.0879828	0.486106	0.284701
2001-08-08	0.548846	0.537724	0.686667	0.572032	0.26679	0.380086	0.510611	0.0882608	0.484657	0.284099
2001-08-09	0.546821	0.534968	0.686042	0.566987	0.26553	0.378404	0.509879	0.0885388	0.483256	0.284391
2001-08-10	0.544795	0.532617	0.686042	0.563624	0.264901	0.375039	0.506952	0.0888168	0.481903	0.283982
2001-08-11	0.541435	0.529677	0.678542	0.561955	0.264271	0.371674	0.504818	0.092014	0.481227	0.284897
2001-08-12	0.54009	0.527105	0.672917	0.558617	0.258645	0.368309	0.502136	0.0896509	0.48055	0.285414
2001-08-13	0.537404	0.524165	0.677917	0.555279	0.258021	0.364944	0.499453	0.0899289	0.479874	0.285796
2001-08-14	0.536735	0.522328	0.674167	0.551941	0.259268	0.363261	0.489938	0.0902069	0.479197	0.286183
2001-08-15	0.535396	0.519021	0.682292	0.548602	0.259268	0.361579	0.492591	0.0926163	0.478521	0.28657
2001-08-16	0.533387	0.516081	0.682917	0.545276	0.259268	0.359896	0.489938	0.0954891	0.477845	0.285449
2001-08-17	0.531378	0.513877	0.675417	0.541961	0.259268	0.356531	0.482509	0.0988947	0.47654	0.284174
2001-08-18	0.529377	0.511304	0.674792	0.538646	0.259268	0.353166	0.480151	0.100204	0.475284	0.283855
2001-08-19	0.527376	0.508732	0.674167	0.536989	0.257397	0.349801	0.479384	0.101269	0.475284	0.28349
2001-08-20	0.528043	0.507263	0.678542	0.535331	0.256773	0.349801	0.477085	0.102335	0.474656	0.284128
2001-08-21	0.546145	0.508365	0.675417	0.530359	0.256773	0.349801	0.480151	0.103473	0.474028	0.277958
2001-08-22	0.544795	0.558338	0.675417	0.527068	0.258645	0.346436	0.478618	0.104636	0.4734	0.278277
2001-08-23	0.542779	0.559073	0.674792	0.523776	0.258021	0.344753	0.477851	0.105823	0.472772	0.278659
2001-08-24	0.540762	0.55944	0.668542	0.522131	0.258021	0.343071	0.475552	0.107082	0.472144	0.280277
2001-08-25	0.537404	0.55944	0.667917	0.518839	0.256773	0.341388	0.473311	0.108342	0.470308	0.281009
2001-08-26	0.534056	0.55944	0.667917	0.515548	0.256773	0.339706	0.471189	0.109674	0.470308	0.282627
2001-08-27	0.531378	0.560175	0.667292	0.512269	0.254928	0.336341	0.468358	0.109674	0.470308	0.282627
2001-08-28	0.528043	0.560543	0.661667	0.507369	0.253698	0.332976	0.470481	0.112411	0.470308	0.283731
2001-08-29	0.526042	0.560543	0.663542	0.504102	0.253083	0.331293	0.469066	0.113864	0.468568	0.284313
2001-08-30	0.522717	0.562748	0.661042	0.500835	0.253083	0.327928	0.466943	0.115681	0.468568	0.285479
2001-08-31	0.519399	0.563115	0.655417	0.497568	0.252468	0.324564	0.464998	0.116793	0.467989	0.287104
2001-09-01	0.516088	0.562748	0.655417	0.492703	0.252468	0.322882	0.462403	0.116793	0.467989	0.287104
2001-09-02	0.512783	0.562013	0.655417	0.487838	0.251237	0.319518	0.457895	0.119674	0.466829	0.288085
2001-09-03	0.510144	0.561645	0.654792	0.484595	0.250622	0.317836	0.456186	0.120887	0.46509	0.288761
2001-09-04	0.507509	0.559073	0.654792	0.481352	0.249398	0.316155	0.453624	0.119977	0.46509	0.288085
2001-09-05	0.505534	0.557236	0.649167	0.478132	0.247562	0.312791	0.451915	0.123465	0.46509	0.287782
2001-09-06	0.503564	0.554664	0.648542	0.474912	0.245725	0.309427	0.447929	0.126835	0.464027	0.289321
2001-09-07	0.501597	0.551724	0.648542	0.471692	0.245113	0.307745	0.449523	0.126835	0.462964	0.288476
2001-09-08	0.498975	0.548417	0.641667	0.468472	0.2433	0.30438	0.447929	0.12848	0.462433	0.306452
2001-09-09	0.497014	0.54658	0.641667	0.465252	0.2433	0.302697	0.444739	0.130178	0.461901	0.28829
2001-09-10	0.495055	0.544008	0.641667	0.458862	0.241499	0.299332	0.441721	0.131465	0.46137	0.288127
2001-09-11	0.493096	0.54217	0.641042	0.454069	0.239698	0.295967	0.4395	0.132686	0.460307	0.288735
2001-09-12	0.49114	0.539378	0.634792	0.449276	0.240899	0.297649	0.438019	0.134129	0.460838	0.290049
2001-09-13	0.492443	0.538716	0.637292	0.44769	0.240899	0.295967	0.435172	0.13531	0.460838	0.290703
2001-09-14	0.490489	0.536585	0.637917	0.44293	0.240298	0.292602	0.434488	0.13657	0.459067	0.292608
2001-09-15	0.488539	0.535372	0.637917	0.441343	0.238497	0.289237	0.432438	0.13783	0.457651	0.294247
2001-09-16	0.486589	0.530779	0.637917	0.439757	0.237899	0.287554	0.431071	0.139168	0.456234	0.294725
2001-09-17	0.484642	0.52784	0.635417	0.436584	0.237899	0.285872	0.430388	0.140533	0.455526	0.295342
2001-09-18	0.483347	0.5249	0.637292	0.433411	0.237899	0.284189	0.427825	0.141924	0.454818	0.296077
2001-09-19	0.481404	0.521961	0.629792	0.430264	0.237302	0.280824	0.425319	0.143394	0.453401	0.295437
2001-09-20	0.479462	0.521226	0.629792	0.427116	0.231345	0.279142	0.42344	0.144864	0.452032	0.297368
2001-09-21	0.47817	0.518653	0.629167	0.423969	0.229579	0.277459	0.420967	0.146412	0.450049	0.297845
2001-09-22	0.475592	0.513509	0.629167	0.419249	0.228401	0.274094	0.419319	0.148381	0.449388	0.297932
2001-09-23	0.473658	0.51057	0.627292	0.41455	0.226052	0.272412	0.417671	0.150034	0.450049	0.264948
2001-09-24	0.471727	0.507263	0.627292	0.411425	0.223138	0.270729	0.414429	0.151478	0.448727	0.204776
2001-09-25	0.470443	0.504323	0.627292	0.4083	0.221972	0.269047	0.410583	0.153	0.441172	0.147236
2001-09-26	0.468517	0.500281	0.624167	0.405175	0.219076	0.265682	0.406793	0.15426	0.437112	0.117383
2001-09-27	0.46531	0.501016	0.624167	0.4005	0.217345	0.262316	0.403221	0.154575	0.425626	0.0953096
2001-09-28	0.464031	0.501383	0.624792	0.430264	0.219076	0.265682	0.399705	0.282684	0.493897	0.999614
2001-09-29	0.461474	0.502118	0.626042	0.436584	0.219076	0.263999	0.397068	0.301871	0.48828	0.974535
2001-09-30	0.458282	0.502486	0.616667	0.43817	0.219076	0.260634	0.393772	0.306946	0.479874	0.931991
2001-10-01	0.4551	0.502486	0.616667	0.439757	0.216768	0.257269	0.392563	0.311279	0.470887	0.903177
2001-10-02	0.453191	0.500281	0.616667	0.439757	0.215614	0.255586	0.391354	0.317458	0.462964	0.870794
2001-10-03	0.451288	0.497709	0.610417	0.439757	0.213895	0.252221	0.388937	0.322483	0.454109	0.826623
2001-10-04	0.448751	0.497709	0.610417	0.439757	0.212181	0.250539	0.386934	0.326966	0.445469	0.780369
2001-10-05	0.445585	0.497709	0.610417	0.439757	0.21161	0.248856	0.383758	0.331758	0.437112	0.715911
2001-10-06	0.442428	0.498076	0.609792	0.439757	0.208763	0.247174	0.381376	0.33802	0.429085	0.658731
2001-10-07	0.440534	0.496239	0.609792	0.43817	0.205951	0.245491	0.379047	0.340832	0.419585	0.576909
2001-10-08	0.439277	0.494402	0.609792	0.43817	0.204827	0.242126	0.376083	0.343587	0.410315	0.49823
2001-10-09	0.436762	0.49183	0.605417	0.434997	0.203146	0.238761	0.373119	0.346493	0.402153	0.434126
2001-10-10	0.435504	0.489257	0.605417	0.434997	0.202033	0.237079	0.371002	0.349498	0.393031	0.373413
2001-10-11	0.434246	0.486685	0.605417	0.433411	0.199807	0.235396	0.367561	0.348296	0.384297	0.332284
2001-10-12	0.432368	0.483746	0.599479	0.433411	0.19925	0.233714	0.365497	0.344689	0.376959	0.30717
2001-10-13	0.430489	0.480806	0.599479	0.430264	0.19759	0.232031	0.362956	0.340281	0.369307	0.283843
2001-10-14	0.42861	0.478969	0.599479	0.42869	0.195946	0.228666	0.361051	0.333382	0.362438	0.262745
2001-10-15	0.42736	0.475662	0.598958	0.427116	0.194303	0.226983	0.358563	0.329053	0.355677	0.239858
2001-10-16	0.425489	0.472355	0.596354	0.425543	0.194303	0.223799	0.356234	0.325459	0.34924	0.221096
2001-10-17	0.423618	0.469048	0.596354	0.423969	0.194303	0.222297	0.354487	0.322946	0.341738	0.188267
2001-10-18	0.421747	0.465006	0.595833	0.422396	0.190481	0.219293	0.351795	0.320627	0.334936	0.180511
2001-10-19	0.419884	0.460597	0.59375	0.422396	0.188847	0.217791	0.349504	0.317033	0.329641	0.177601
2001-10-20	0.418641	0.456554	0.585938	0.422396	0.187757	0.214788	0.346449	0.311279	0.323168	0.170289
2001-10-21	0.416157	0.453982	0.585938	0.422396	0.186677	0.213286	0.343546	0.296279	0.322656	0.163304
2001-10-22	0.414917	0.450308	0.585417	0.422396	0.186141	0.210282	0.341408	0.282188	0.322143	0.157197
2001-10-23	0.413063	0.446266	0.578646	0.422396	0.183997	0.20878	0.339982	0.266954	0.322143	0.153159
2001-10-24	0.411208	0.444061	0.578646	0.422396	0.181853	0.20878	0.337894	0.253426	0.316165	0.14799
2001-10-25	0.409972	0.441121	0.578646	0.422396	0.180798	0.207278	0.335246	0.238933	0.31022	0.148068
2001-10-26	0.408122	0.438182	0.572917	0.422396	0.179744	0.205776	0.332598	0.222722	0.304105	0.133954
2001-10-27	0.406274	0.435242	0.572917	0.422396	0.178162	0.204274	0.330714	0.206344	0.30185	0.125646
2001-10-28	0.404425	0.431935	0.56875	0.422396	0.176581	0.202772	0.328881	0.190124	0.301474	0.117829
2001-10-29	0.403809	0.428996	0.572917	0.422396	0.173435	0.20127	0.326437	0.174744	0.30185	0.108208
2001-10-30	0.40258	0.425689	0.570312	0.422396	0.172387	0.20127	0.324145	0.160454	0.301474	0.0997819
2001-10-31	0.400741	0.423116	0.570833	0.420822	0.169792	0.198266	0.323025	0.15363	0.300476	0.103311
2001-11-01	0.398902	0.420177	0.568229	0.417675	0.161087	0.196765	0.321345	0.1472	0.295553	0.106925
2001-11-02	0.397676	0.417972	0.567708	0.416112	0.16008	0.193761	0.319491	0.141557	0.287936	0.111571
2001-11-03	0.398289	0.41834	0.580729	0.417675	0.152585	0.190757	0.318757	0.136255	0.290098	0.122857
2001-11-04	0.400128	0.423484	0.592708	0.427116	0.151595	0.198266	0.318024	0.132108	0.29053	0.161038
2001-11-05	0.398902	0.425689	0.601562	0.42869	0.148654	0.198266	0.316556	0.124779	0.290963	0.209984
2001-11-06	0.399515	0.427526	0.611667	0.431837	0.148654	0.198266	0.314355	0.118461	0.291395	0.225946
2001-11-07	0.398902	0.428628	0.614792	0.430264	0.151595	0.196765	0.311518	0.112047	0.291395	0.246634
2001-11-08	0.398289	0.427893	0.615417	0.42869	0.151595	0.196765	0.310834	0.104927	0.288801	0.255054
2001-11-09	0.397063	0.425689	0.616042	0.42869	0.151595	0.193761	0.308779	0.101536	0.28431	0.272619
2001-11-10	0.395841	0.423484	0.616042	0.427116	0.1511	0.192259	0.30604	0.0985472	0.279852	0.271087
2001-11-11	0.39401	0.420912	0.609792	0.427116	0.143309	0.190757	0.304133	0.094516	0.274091	0.278159
2001-11-12	0.392178	0.417972	0.609792	0.427116	0.142826	0.190757	0.304133	0.0899289	0.268784	0.277003
2001-11-13	0.390957	0.415767	0.609167	0.427116	0.140427	0.187753	0.300318	0.0856429	0.263152	0.281589
2001-11-14	0.389133	0.413195	0.602604	0.427116	0.139953	0.186251	0.299095	0.0796552	0.257871	0.284532
2001-11-15	0.388525	0.410279	0.605417	0.427116	0.138529	0.187753	0.296747	0.0723469	0.244844	0.289806
2001-11-16	0.387917	0.408465	0.612292	0.42869	0.138529	0.189255	0.29616	0.0637117	0.249281	0.267031
2001-11-17	0.386093	0.405116	0.612917	0.42869	0.138529	0.187753	0.2944	0.0574987	0.244089	0.241564
2001-11-18	0.384877	0.404009	0.606667	0.42869	0.139953	0.184749	0.292199	0.0574987	0.239746	0.201577
2001-11-19	0.382457	0.40107	0.606667	0.427116	0.139953	0.181745	0.289509	0.0574987	0.238708	0.210034
2001-11-20	0.383062	0.396293	0.617917	0.427116	0.139478	0.181745	0.289509	0.0574987	0.237903	0.217469
2001-11-21	0.393399	0.41173	0.671042	0.427116	0.143309	0.189255	0.286861	0.0574987	0.238708	0.225297
2001-11-22	0.395231	0.418707	0.678542	0.427116	0.145725	0.186251	0.284503	0.0574987	0.238708	0.228791
2001-11-23	0.39462	0.419809	0.666667	0.423969	0.146698	0.183247	0.284503	0.0574987	0.233777	0.223628
2001-11-24	0.39462	0.419442	0.648542	0.422396	0.149632	0.184749	0.286075	0.0574987	0.227113	0.217394
2001-11-25	0.40258	0.426056	0.685417	0.433411	0.162106	0.189255	0.287647	0.0711885	0.228703	0.313995
2001-11-26	0.408738	0.432303	0.727292	0.439757	0.172911	0.193761	0.288432	0.0723469	0.225921	0.486961
2001-11-27	0.413063	0.43708	0.713542	0.44293	0.178162	0.195263	0.289509	0.0708726	0.221856	0.47606
2001-11-28	0.413681	0.439284	0.676667	0.44293	0.178162	0.195263	0.290047	0.0677345	0.218048	0.443303
2001-11-29	0.413681	0.439652	0.671042	0.44293	0.180271	0.199768	0.290047	0.0680293	0.21072	0.39259
2001-11-30	0.417399	0.443326	0.679167	0.450874	0.19266	0.205776	0.290047	0.0745162	0.20532	0.511863
2001-12-01	0.422371	0.449573	0.679167	0.457264	0.203702	0.204274	0.288971	0.0796552	0.200841	0.549297
2001-12-02	0.451922	0.503955	0.711667	0.463655	0.221389	0.207278	0.291123	0.0752744	0.197051	0.545524
2001-12-03	0.480109	0.538055	0.774167	0.504102	0.255543	0.211784	0.297921	0.0805397	0.197483	0.774617
2001-12-04	0.528043	0.59839	0.851458	0.538646	0.390358	0.267364	0.358563	0.0848784	0.199535	0.835344
2001-12-05	0.558323	0.627786	0.829583	0.561955	0.458073	0.275777	0.385346	0.0893729	0.198346	0.790335
2001-12-06	0.571282	0.645328	0.870417	0.568669	0.485722	0.285872	0.395749	0.0917128	0.195325	0.761891
2001-12-07	0.577454	0.654374	0.872917	0.572032	0.510605	0.285872	0.402507	0.0932187	0.193282	0.706431
2001-12-08	0.601668	0.68896	0.697292	0.578758	0.550581	0.302697	0.416847	0.0999372	0.194893	0.733814
2001-12-09	0.648253	0.749619	0.697917	0.587212	0.589948	0.334658	0.442461	0.105508	0.199535	0.77153
2001-12-10	0.695317	0.802828	0.674167	0.623005	0.623115	0.356531	0.457895	0.108657	0.20182	0.833384
2001-12-11	0.71521	0.824644	0.660417	0.623005	0.627654	0.359896	0.464349	0.112047	0.202146	0.826455
2001-12-12	0.724119	0.834221	0.570312	0.62644	0.63403	0.366626	0.471896	0.117071	0.203896	0.845512
2001-12-13	0.739802	0.857634	0.570312	0.628157	0.648698	0.369991	0.481684	0.116515	0.202146	0.841351
2001-12-14	0.763176	0.890624	0.570312	0.63505	0.675629	0.385134	0.491707	0.115959	0.199209	0.825961
2001-12-15	0.772294	0.904459	0.570312	0.640238	0.690672	0.386816	0.497013	0.115681	0.19288	0.787552
2001-12-16	0.776869	0.90978	0.569792	0.643696	0.697303	0.391864	0.500794	0.115317	0.190118	0.758538
2001-12-17	0.782216	0.914568	0.567708	0.657585	0.708731	0.402429	0.508416	0.117071	0.1875	0.690945
2001-12-18	0.837249	0.955541	0.59375	0.697933	0.79884	0.47526	0.580066	0.118461	0.190866	0.745204
2001-12-19	0.870513	0.986403	0.635417	0.724591	0.81699	0.50723	0.593519	0.121493	0.193685	0.810575
2001-12-20	0.880928	0.994917	0.583333	0.726379	0.829195	0.510783	0.604568	0.123136	0.193685	0.829655
2001-12-21	0.887704	0.999735	0.572917	0.728167	0.854852	0.521442	0.613796	0.124779	0.194893	0.838247
2001-12-22	0.893774	0.999794	0.567708	0.731743	0.898691	0.539206	0.628228	0.128891	0.197051	0.849404
2001-12-23	0.91904	1	0.572917	0.740708	0.92735	0.565849	0.649468	0.128891	0.199861	0.849404
2001-12-24	0.934655	1	0.649167	0.746109	0.950971	0.576683	0.669809	0.174744	0.204964	0.996586
2001-12-25	1	1	0.877083	0.903428	1	0.765936	0.768389	0.477563	0.269204	0.996586
2001-12-26	1	1	0.742917	0.974614	1	0.946366	0.865779	0.477563	0.292759	0.996586
2001-12-27	1	1	0.674167	0.970729	1	0.948282	0.868782	0.503411	0.302602	0.996586
2001-12-28	1	1	0.575521	0.95522	1	0.946366	0.880322	0.529864	0.308922	0.996586
2001-12-29	1	1	0.570312	0.941698	1	0.977014	0.901761	0.554019	0.318078	0.996586
2001-12-30	1	1	0.567708	0.951356	1	0.975099	0.909107	0.560346	0.324838	0.996586
2001-12-31	1	1	0.567708	0.961015	1	0.97893	0.916119	0.598362	0.358015	0.996586
2002-01-01	1	1	0.567708	0.9785	1	0.988507	0.931145	0.875819	0.362942	0.996586
2002-01-02	1	1	0.598958	0.961015	1	1	0.982492	0.987804	0.34924	0.996586
2002-01-03	1	1	0.578125	0.966843	1	0.954028	0.994372	0.999992	0.34023	0.996586
2002-01-04	1	0.999971	0.572917	0.974614	1	0.910599	1	0.999992	0.334936	0.996586
2002-01-05	1	0.999706	0.567708	0.968786	0.978092	0.873021	1	0.999992	0.333568	0.996586
2002-01-06	1	0.995981	0.567708	0.951356	0.957444	0.820421	1	0.999992	0.306462	0.996586
2002-01-07	1	0.993321	0.567708	0.941698	0.932695	0.790357	1	0.999992	0.325995	0.996586
2002-01-08	1	0.995449	0.5625	0.945561	0.91139	0.779086	1	0.999992	0.325609	0.996586
2002-01-09	0.994904	0.999174	0.552083	0.947493	0.88817	0.780965	1	0.999992	0.326766	0.996586
2002-01-10	1	0.999853	0.549479	0.947493	0.867293	0.784722	1	0.999992	0.327152	0.996586
2002-01-11	1	1	0.545833	0.949425	0.846604	0.788479	1	0.999992	0.327958	0.996586
2002-01-12	1	1	0.53125	0.949425	0.845576	0.794115	1	0.999992	0.329641	0.996586
2002-01-13	1	1	0.540104	0.951356	0.854852	0.805391	1	0.999992	0.3288	0.996586
2002-01-14	1	1	0.536458	0.953288	0.866254	0.811028	1	0.999992	0.327958	0.996586
2002-01-15	1	1	0.533854	0.953288	0.879794	0.820421	1	0.999992	0.329641	0.996586
2002-01-16	1	1	0.536458	0.961015	0.894473	0.837328	1	0.999992	0.328379	0.996586
2002-01-17	1	1	0.536458	0.968786	0.91033	0.852357	1	0.999992	0.327958	0.996586
2002-01-18	1	1	0.536458	0.972672	0.920953	0.863628	1	0.999992	0.328379	0.996586
2002-01-19	1	1	0.539062	0.980443	0.929488	0.871143	1	0.999992	0.32922	0.996586
2002-01-20	1	1	0.539062	0.988266	0.936983	0.880536	1	0.999992	0.337285	0.996586
2002-01-21	1	1	0.541667	1	0.943432	0.886171	1	0.999992	0.327958	0.996586
2002-01-22	1	1	0.536458	0.996089	0.949893	0.891809	1	0.999992	0.339739	0.996586
2002-01-23	1	1	0.533854	0.994133	0.945582	0.895567	1	0.999992	0.338757	0.996586
2002-01-24	1	1	0.535417	0.998044	0.947737	0.901205	1	0.999992	0.342264	0.996586
2002-01-25	1	1	0.535417	1	0.949893	0.903084	1	0.999992	0.354742	0.996586
2002-01-26	1	1	0.534896	1	0.950971	0.904964	1	0.999992	0.352153	0.996586
2002-01-27	1	1	0.534896	0.992177	0.950971	0.906842	1	0.999992	0.344893	0.996586
2002-01-28	1	1	0.533854	0.994133	0.950971	0.908721	1	0.999992	0.34023	0.996586
2002-01-29	1	1	0.535417	0.996089	0.953127	0.912478	1	0.999992	0.338757	0.996586
2002-01-30	1	1	0.535417	0.998044	0.953127	0.914356	1	0.999992	0.338757	0.996586
2002-01-31	1	1	0.536458	0.998044	0.953127	0.914356	1	0.999992	0.335391	0.996586
2002-02-01	1	1	0.5375	1	0.953127	0.916235	1	0.999992	0.334024	0.996586
2002-02-02	0.997452	0.999912	0.538021	1	0.952049	0.916235	1	0.999992	0.334024	0.996586
2002-02-03	0.996603	0.999794	0.538021	1	0.950971	0.918114	1	0.999992	0.332657	0.996586
2002-02-04	0.994904	0.999706	0.536979	1	0.949893	0.918114	1	0.999992	0.330903	0.996586
2002-02-05	0.994055	0.997046	0.538021	1	0.949893	0.918114	1	0.999992	0.330062	0.996586
2002-02-06	0.993206	0.994917	0.539062	1	0.949893	0.918114	1	0.999992	0.32922	0.996586
2002-02-07	0.992356	0.993853	0.541667	1	0.948815	0.919992	1	0.999992	0.328379	0.996586
2002-02-08	0.992356	0.99066	0.544271	1	0.94666	0.919992	1	0.999992	0.3288	0.996586
2002-02-09	0.991507	0.989063	0.547396	1	0.945582	0.919992	1	0.999992	0.327958	0.996586
2002-02-10	0.990662	0.986403	0.547396	0.998044	0.945582	0.919992	1	0.999992	0.335847	0.996586
2002-02-11	0.990662	0.984274	0.55	1	0.941282	0.919992	1	0.999992	0.336794	0.996586
2002-02-12	0.988971	0.981614	0.550521	0.996089	0.939132	0.919992	1	0.999992	0.335847	0.996586
2002-02-13	0.988125	0.979486	0.554688	0.996089	0.936983	0.919992	1	0.999992	0.331324	0.996586
2002-02-14	0.988125	0.976825	0.553646	0.994133	0.935908	0.919992	1	0.999992	0.331745	0.996586
2002-02-15	0.98728	0.974165	0.554688	0.992177	0.933764	0.919992	1	0.999992	0.331324	0.996586
2002-02-16	0.985589	0.971504	0.555729	0.988266	0.931626	0.919992	1	0.999992	0.329641	0.996586
2002-02-17	0.983898	0.969376	0.555729	0.988266	0.929488	0.919992	1	0.999992	0.329641	0.996586
2002-02-18	0.983898	0.966183	0.558333	0.98631	0.92735	0.919992	0.997186	0.999992	0.330062	0.996586
2002-02-19	0.983052	0.962459	0.558333	0.98631	0.925212	0.919992	0.994372	0.999992	0.330062	0.996586
2002-02-20	0.981367	0.961394	0.5625	0.984354	0.925212	0.919992	0.997186	0.999992	0.328379	0.996586
2002-02-21	0.981367	0.958734	0.5625	0.988266	0.926281	0.927506	0.997186	0.999992	0.32922	0.996586
2002-02-22	0.981367	0.956073	0.5625	0.988266	0.926281	0.927506	0.995779	0.999992	0.32922	0.996586
2002-02-23	0.979682	0.953945	0.5625	0.988266	0.926281	0.929385	0.994372	0.999992	0.328379	0.996586
2002-02-24	0.97884	0.951816	0.5625	0.988266	0.925212	0.929385	0.992965	0.999992	0.327958	0.996586
2002-02-25	0.979682	0.948091	0.5625	0.988266	0.926281	0.933142	0.994372	0.999992	0.3288	0.996586
2002-02-26	0.98728	0.95022	0.573958	0.996089	0.941282	0.938778	0.998593	0.999992	0.329641	0.996586
2002-02-27	0.988971	0.951284	0.635417	1	0.948815	0.940656	0.998593	0.999992	0.329641	0.996586
2002-02-28	0.989816	0.95288	0.640417	1	0.953127	0.942535	1	0.999992	0.329641	0.996586
2002-03-01	0.988971	0.953412	0.645417	1	0.954204	0.944451	1	0.999992	0.329641	0.996586
2002-03-02	0.988125	0.955009	0.649167	1	0.954204	0.944451	1	0.999992	0.32922	0.996586
2002-03-03	0.988125	0.953412	0.652292	1	0.954204	0.944451	1	0.999992	0.32922	0.996586
2002-03-04	0.98728	0.950752	0.655417	1	0.954204	0.946366	1	0.999992	0.32922	0.996586
2002-03-05	0.986434	0.948623	0.657917	1	0.954204	0.946366	1	0.999992	0.32922	0.996586
2002-03-06	0.985589	0.945963	0.657917	1	0.953127	0.946366	0.997186	0.999992	0.328379	0.996586
2002-03-07	0.984743	0.943834	0.659167	1	0.953127	0.946366	1	0.999992	0.327958	0.996586
2002-03-08	0.983898	0.941174	0.659167	1	0.949893	0.946366	0.997186	0.999992	0.328379	0.996586
2002-03-09	0.983898	0.937981	0.659792	0.996089	0.947737	0.944451	0.995779	0.999992	0.3288	0.996586
2002-03-10	0.98221	0.935853	0.659167	0.994133	0.944507	0.944451	0.992965	0.999992	0.327958	0.996586
2002-03-11	0.981367	0.93266	0.661042	0.992177	0.942357	0.944451	0.992965	0.999992	0.327537	0.996586
2002-03-12	0.980525	0.930532	0.661042	0.992177	0.943432	0.944451	0.991559	0.999992	0.329641	0.996586
2002-03-13	0.979682	0.927872	0.661042	0.992177	0.942357	0.944451	0.990152	0.999992	0.32922	0.996586
2002-03-14	0.97884	0.925211	0.661042	0.992177	0.942357	0.944451	0.987338	0.999992	0.32922	0.996586
2002-03-15	0.977997	0.922896	0.661042	0.988266	0.941282	0.944451	0.987338	0.999992	0.3288	0.996586
2002-03-16	0.977155	0.919424	0.660417	0.988266	0.941282	0.944451	0.984784	0.999992	0.3288	0.996586
2002-03-17	0.976312	0.916511	0.660417	0.990221	0.940207	0.944451	0.983638	0.999992	0.328379	0.996586
2002-03-18	0.97547	0.914036	0.661042	0.984354	0.939132	0.944451	0.981345	0.999992	0.328379	0.996586
2002-03-19	0.973788	0.910844	0.661667	0.982398	0.940207	0.942535	0.979053	0.999992	0.328379	0.996586
2002-03-20	0.972949	0.908183	0.662292	0.980443	0.940207	0.942535	0.977906	0.999992	0.327958	0.996586
2002-03-21	0.972949	0.906055	0.676042	0.980443	0.943432	0.942535	0.977906	0.999992	0.329641	0.996586
2002-03-22	0.97211	0.903927	0.685417	0.980443	0.944507	0.942535	0.977906	0.999992	0.329641	0.996586
2002-03-23	0.971271	0.900734	0.688542	0.9785	0.945582	0.944451	0.97676	0.999992	0.329641	0.996586
2002-03-24	0.972949	0.899138	0.689792	0.988266	0.948815	0.946366	0.977906	0.999992	0.330062	0.996586
2002-03-25	0.973788	0.894881	0.704167	1	0.949893	0.946366	0.979053	0.999992	0.329641	0.996586
2002-03-26	0.976312	0.898606	0.721042	1	0.952049	0.950197	0.979053	0.999992	0.329641	0.996586
2002-03-27	1	0.932128	0.764792	0.998044	0.975913	0.955944	0.981345	0.999992	0.329641	0.996586
2002-03-28	1	0.945963	0.783542	1	0.986832	0.96169	0.983638	0.999992	0.329641	0.996586
2002-03-29	1	0.952348	0.798958	1	0.997803	0.967437	0.984784	0.999992	0.329641	0.996586
2002-03-30	1	0.95767	0.809896	1	1	0.971268	0.988745	0.999992	0.329641	0.996586
2002-03-31	1	0.960862	0.813542	1	1	0.971268	0.994372	0.999992	0.329641	0.996586
2002-04-01	1	0.962459	0.836875	1	1	0.971268	0.997186	0.999992	0.329641	0.996586
2002-04-02	1	0.962991	0.844167	1	1	0.973183	0.998593	0.999992	0.329641	0.996586
2002-04-03	1	0.966183	0.851458	1	1	0.973183	0.998593	0.999992	0.329641	0.996586
2002-04-04	1	0.967247	0.855104	1	1	0.971268	0.997186	0.999992	0.329641	0.996586
2002-04-05	1	0.96778	0.859479	1	1	0.975099	1	0.999992	0.329641	0.996586
2002-04-06	1	0.981082	0.861667	1	1	0.992338	1	0.999992	0.329641	0.996586
2002-04-07	1	0.986403	0.859479	1	1	1	1	0.999992	0.329641	0.996586
2002-04-08	1	0.993321	0.699167	1	1	1	1	0.999992	0.329641	0.996586
2002-04-09	1	0.995981	0.699167	1	1	1	1	0.999992	0.329641	0.996586
2002-04-10	1	0.997578	0.702292	1	1	1	1	0.999992	0.32922	0.996586
2002-04-11	1	0.99811	0.677292	1	1	1	1	0.999992	0.32922	0.996586
2002-04-12	1	0.997578	0.711667	1	1	1	1	0.999992	0.32922	0.996586
2002-04-13	1	0.996513	0.709792	1	1	1	0.998593	0.999992	0.32922	0.996586
2002-04-14	1	0.995449	0.714792	1	1	1	1	0.999992	0.32922	0.996586
2002-04-15	1	0.994917	0.721042	1	1	1	1	0.999992	0.329641	0.996586
2002-04-16	1	0.993853	0.702292	1	0.998902	1	1	0.999992	0.32922	0.996586
2002-04-17	1	0.993853	0.636667	1	0.996705	1	1	0.999992	0.313773	0.996586
2002-04-18	1	0.993853	0.637917	1	0.994508	1	1	0.999992	0.305232	0.996586
2002-04-19	0.999151	0.991724	0.639792	1	0.991213	1	1	0.999992	0.303353	0.996586
2002-04-20	0.999151	0.990128	0.633542	1	0.986832	1	1	0.999992	0.303353	0.938
2002-04-21	0.997452	0.989063	0.630417	1	0.984647	1	1	0.999992	0.287503	0.938
2002-04-22	0.996603	0.986935	0.639792	1	0.982462	1	1	0.999992	0.285507	0.938
2002-04-23	0.994904	0.984807	0.639792	1	0.979185	1	1	0.999992	0.279852	0.996586
2002-04-24	0.994055	0.982678	0.644792	1	0.977003	1	1	0.999992	0.279852	0.996586
2002-04-25	0.993206	0.980018	0.647917	1	0.973734	1	1	0.999992	0.279852	0.996586
2002-04-26	0.992356	0.977889	0.649167	1	0.970465	1	0.997186	0.999992	0.279852	0.996586
2002-04-27	0.991507	0.975229	0.649167	1	0.969376	1	0.995779	0.999992	0.279852	0.996586
2002-04-28	0.990662	0.972568	0.649167	1	0.969376	1	0.992965	0.999992	0.279852	0.996586
2002-04-29	0.989816	0.969908	0.654167	0.998044	0.968286	1	0.991559	0.999992	0.279852	0.996586
2002-04-30	0.988971	0.96778	0.655417	0.996089	0.967197	1	0.990152	0.999992	0.279852	0.996586
2002-05-01	0.988125	0.965119	0.655417	0.994133	0.965029	1	0.988745	0.999992	0.279852	0.996586
2002-05-02	0.98728	0.962459	0.656042	0.992177	0.963946	1	0.987338	0.999992	0.279852	0.996586
2002-05-03	0.985589	0.959798	0.656042	0.990221	0.961778	1	0.985931	0.999992	0.279852	0.996586
2002-05-04	0.983898	0.956605	0.656042	0.988266	0.960695	1	0.988745	0.999992	0.279852	0.996586
2002-05-05	0.983052	0.953945	0.656042	0.98631	0.958527	0.998085	0.988745	0.999992	0.279852	0.996586
2002-05-06	0.981367	0.951284	0.656042	0.984354	0.957444	0.998085	0.985931	0.999992	0.279852	0.996586
2002-05-07	0.97884	0.948623	0.652917	0.980443	0.955282	0.996169	0.985931	0.999992	0.279852	0.996586
2002-05-08	0.976312	0.946495	0.652917	0.9785	0.954204	0.994254	0.984784	0.999992	0.279852	0.996586
2002-05-09	0.972949	0.946495	0.652917	0.974614	0.952049	0.992338	0.984784	0.999992	0.279852	0.996586
2002-05-10	0.969593	0.945431	0.652917	0.972672	0.950971	0.992338	0.982492	0.999992	0.279852	0.996586
2002-05-11	0.967914	0.943834	0.652917	0.970729	0.949893	0.990423	0.979053	0.999992	0.279852	0.996586
2002-05-12	0.964565	0.951816	0.652917	0.968786	0.947737	0.988507	0.960005	0.999992	0.279852	0.996586
2002-05-13	0.962058	0.951816	0.649792	0.966843	0.945582	0.988507	0.958065	0.999992	0.279852	0.996586
2002-05-14	0.960386	0.951816	0.649792	0.962958	0.943432	0.986592	0.958065	0.999992	0.279852	0.996586
2002-05-15	0.959551	0.949155	0.644167	0.959083	0.942357	0.986592	0.954185	0.999992	0.279852	0.996586
2002-05-16	0.957879	0.946495	0.644167	0.95522	0.941282	0.984676	0.951681	0.999992	0.279852	0.996586
2002-05-17	0.956214	0.943302	0.644167	0.951356	0.940207	0.982761	0.949177	0.999992	0.283512	0.996586
2002-05-18	0.954548	0.94011	0.640417	0.947493	0.938058	0.982761	0.94542	0.999992	0.284709	0.996586
2002-05-19	0.952883	0.937449	0.640417	0.945561	0.934833	0.980845	0.941664	0.999992	0.285507	0.996586
2002-05-20	0.950385	0.934257	0.639792	0.941698	0.932695	0.980845	0.938157	0.999992	0.285907	0.996586
2002-05-21	0.948723	0.931064	0.635417	0.939778	0.930557	0.97893	0.934651	0.999992	0.286306	0.996586
2002-05-22	0.945405	0.927872	0.631042	0.93594	0.928419	0.977014	0.932314	0.999992	0.286705	0.996586
2002-05-23	0.943747	0.924632	0.630417	0.93402	0.92735	0.977014	0.931145	0.999992	0.287503	0.996586
2002-05-24	0.942917	0.921739	0.630417	0.930182	0.925212	0.975099	0.929977	0.999992	0.287936	0.992424
2002-05-25	0.942088	0.918453	0.630417	0.928262	0.922016	0.973183	0.927806	0.999992	0.288368	0.948428
2002-05-26	0.942917	0.91554	0.630417	0.924424	0.91989	0.969352	0.925636	0.999992	0.289233	0.952478
2002-05-27	0.940433	0.91244	0.630417	0.924424	0.914574	0.975099	0.924551	0.999992	0.290963	0.86144
2002-05-28	0.938782	0.909247	0.629792	0.922504	0.913511	0.973183	0.924551	0.999992	0.29369	0.818661
2002-05-29	0.937131	0.906055	0.625417	0.920597	0.91139	0.971268	0.923465	0.999992	0.294156	0.811785
2002-05-30	0.93548	0.902862	0.625417	0.918689	0.90927	0.971268	0.923465	0.984383	0.294622	0.791661
2002-05-31	0.934655	0.900202	0.625417	0.918689	0.90821	0.969352	0.921295	0.9764	0.296019	0.813794
2002-06-01	0.933829	0.897009	0.622292	0.916781	0.907149	0.967437	0.919125	0.974282	0.296485	0.799703
2002-06-02	0.929712	0.894349	0.620417	0.912966	0.905029	0.967437	0.919125	0.973223	0.298979	0.786558
2002-06-03	0.929712	0.890624	0.622292	0.909151	0.901854	0.965521	0.919125	0.972165	0.300476	0.773506
2002-06-04	0.928889	0.887964	0.617292	0.909151	0.9008	0.965521	0.918123	0.971106	0.305232	0.763032
2002-06-05	0.928066	0.884771	0.618542	0.909151	0.899745	0.963606	0.919125	0.974282	0.307282	0.7513
2002-06-06	0.92642	0.883707	0.626042	0.907243	0.898691	0.965521	0.919125	0.972165	0.311553	0.665466
2002-06-07	0.924774	0.880514	0.622292	0.905335	0.897636	0.963606	0.919125	0.970047	0.313773	0.647673
2002-06-08	0.923136	0.877854	0.617292	0.903428	0.894473	0.96169	0.919125	0.972165	0.316165	0.625445
2002-06-09	0.919859	0.875725	0.622292	0.899637	0.893419	0.959775	0.919125	0.971106	0.317121	0.609628
2002-06-10	0.917402	0.873065	0.617917	0.897742	0.890267	0.957859	0.917121	0.970047	0.319581	0.515266
2002-06-11	0.91495	0.870404	0.617917	0.895846	0.88817	0.957859	0.917121	0.967929	0.322143	0.474807
2002-06-12	0.913318	0.868276	0.617917	0.893951	0.886073	0.959775	0.917121	0.965811	0.324066	0.42292
2002-06-13	0.911686	0.865615	0.617917	0.892056	0.885025	0.957859	0.917121	0.962879	0.324452	0.384333
2002-06-14	0.909237	0.862423	0.617917	0.89016	0.881879	0.955944	0.916119	0.959946	0.325223	0.328946
2002-06-15	0.906796	0.85923	0.617917	0.888265	0.880836	0.954028	0.916119	0.956036	0.325609	0.222124
2002-06-16	0.903545	0.857101	0.617917	0.888265	0.877708	0.952113	0.915118	0.951556	0.325609	0.260171
2002-06-17	0.901919	0.854441	0.617292	0.884474	0.87458	0.950197	0.915118	0.947076	0.325995	0.289446
2002-06-18	0.899569	0.85178	0.611667	0.882591	0.871452	0.948282	0.915118	0.933407	0.32638	0.29355
2002-06-19	0.896672	0.848056	0.610417	0.878823	0.869373	0.946366	0.914116	0.920813	0.326766	0.298651
2002-06-20	0.895223	0.845927	0.602604	0.875056	0.865214	0.942535	0.914116	0.909294	0.327152	0.304207
2002-06-21	0.89305	0.842203	0.597396	0.875056	0.863134	0.940656	0.913114	0.897161	0.327537	0.307637
2002-06-22	0.890377	0.840606	0.596875	0.871289	0.861055	0.938778	0.913114	0.884061	0.327537	0.310349
2002-06-23	0.887704	0.837946	0.596354	0.867522	0.856919	0.936899	0.913114	0.857421	0.327958	0.310685
2002-06-24	0.88414	0.834753	0.595313	0.865638	0.854852	0.935021	0.913114	0.81976	0.327958	0.310152
2002-06-25	0.881731	0.833157	0.588542	0.863766	0.852784	0.933142	0.912112	0.811313	0.328379	0.305104
2002-06-26	0.878519	0.831029	0.582292	0.861894	0.849688	0.931264	0.912112	0.789491	0.32922	0.310207
2002-06-27	0.87611	0.827836	0.578125	0.860022	0.845576	0.929385	0.912112	0.785011	0.330062	0.307565
2002-06-28	0.873712	0.82624	0.575521	0.856279	0.842492	0.925628	0.912112	0.776692	0.330062	0.271131
2002-06-29	0.871313	0.824111	0.571354	0.852535	0.839414	0.923749	0.911111	0.769013	0.330062	0.306831
2002-06-30	0.868115	0.820919	0.571354	0.848791	0.836347	0.921871	0.910109	0.757174	0.32922	0.293555
2002-07-01	0.865726	0.818258	0.571354	0.846919	0.834303	0.918114	0.910109	0.745207	0.32922	0.287736
2002-07-02	0.863337	0.815598	0.565104	0.843199	0.831236	0.916235	0.910109	0.731256	0.3288	0.277313
2002-07-03	0.860949	0.814002	0.56875	0.839478	0.830214	0.914356	0.909107	0.715201	0.3288	0.272819
2002-07-04	0.858567	0.810277	0.569792	0.837618	0.828176	0.910599	0.909107	0.693185	0.32922	0.272771
2002-07-05	0.856189	0.808149	0.568229	0.833898	0.826137	0.908721	0.908189	0.675517	0.32922	0.272866
2002-07-06	0.85381	0.804956	0.566146	0.832038	0.82206	0.906842	0.907271	0.658188	0.329641	0.274486
2002-07-07	0.851435	0.802296	0.565104	0.832038	0.819011	0.903084	0.907271	0.641388	0.330062	0.273791
2002-07-08	0.849066	0.799103	0.563021	0.830177	0.814969	0.901205	0.906352	0.627781	0.330062	0.271591
2002-07-09	0.846696	0.795911	0.561458	0.830177	0.812948	0.897447	0.905434	0.614179	0.330062	0.265052
2002-07-10	0.844327	0.792718	0.559375	0.830177	0.80891	0.895567	0.905434	0.605954	0.330062	0.265517
2002-07-11	0.841967	0.79059	0.55625	0.830177	0.806895	0.891809	0.904516	0.598362	0.330062	0.263405
2002-07-12	0.839608	0.787397	0.548958	0.830177	0.799842	0.88993	0.904516	0.591403	0.330062	0.257375
2002-07-13	0.837249	0.784204	0.545312	0.828317	0.795835	0.88805	0.902679	0.582776	0.330062	0.25553
2002-07-14	0.834896	0.781012	0.544271	0.826469	0.793832	0.886171	0.901761	0.570986	0.330062	0.253189
2002-07-15	0.83333	0.777819	0.541146	0.824621	0.790827	0.882414	0.901761	0.563797	0.330062	0.255137
2002-07-16	0.830198	0.774627	0.538021	0.820926	0.788829	0.878657	0.899925	0.557183	0.32922	0.249007
2002-07-17	0.827852	0.770902	0.534375	0.820926	0.785842	0.876778	0.892811	0.547118	0.32922	0.234797
2002-07-18	0.82551	0.76771	0.530208	0.819078	0.780863	0.873021	0.888069	0.53734	0.32922	0.211762
2002-07-19	0.823169	0.763453	0.528646	0.81723	0.775895	0.871143	0.883642	0.529864	0.32922	0.209334
2002-07-20	0.82005	0.759728	0.523958	0.815382	0.772917	0.869264	0.879216	0.475834	0.32922	0.179897
2002-07-21	0.818494	0.755472	0.522396	0.813534	0.770931	0.867386	0.874948	0.471514	0.32922	0.176445
2002-07-22	0.815382	0.752811	0.519792	0.811686	0.76797	0.863628	0.870838	0.451985	0.32922	0.172981
2002-07-23	0.813048	0.750151	0.515625	0.808002	0.765018	0.86175	0.868782	0.441385	0.32922	0.172943
2002-07-24	0.809949	0.745894	0.5125	0.806166	0.762065	0.859871	0.868782	0.431081	0.32922	0.171481
2002-07-25	0.808399	0.741637	0.508854	0.80433	0.760097	0.856114	0.867755	0.41984	0.32922	0.17115
2002-07-26	0.805299	0.73738	0.505208	0.802494	0.75421	0.852357	0.867755	0.406725	0.328379	0.171202
2002-07-27	0.803755	0.733656	0.501563	0.800658	0.752248	0.850478	0.867755	0.389774	0.327537	0.158408
2002-07-28	0.801439	0.729931	0.497917	0.796985	0.748335	0.8486	0.866727	0.37725	0.326766	0.149685
2002-07-29	0.799895	0.726206	0.496875	0.796985	0.744434	0.844843	0.866727	0.347695	0.32638	0.11999
2002-07-30	0.797579	0.72195	0.493229	0.795149	0.742483	0.841086	0.866727	0.33628	0.325995	0.12303
2002-07-31	0.795271	0.719289	0.491146	0.793313	0.740532	0.839207	0.86483	0.33744	0.325223	0.140187
2002-08-01	0.792193	0.716097	0.4875	0.791477	0.736655	0.837328	0.86483	0.339179	0.324066	0.137314
2002-08-02	0.789885	0.712372	0.485938	0.787829	0.733746	0.83545	0.862933	0.341934	0.324066	0.14186
2002-08-03	0.789118	0.708647	0.483333	0.784182	0.731807	0.833571	0.861985	0.343036	0.324452	0.146173
2002-08-04	0.787584	0.704391	0.482292	0.780534	0.729874	0.831693	0.861036	0.345291	0.324066	0.150303
2002-08-05	0.786051	0.700666	0.479687	0.776886	0.72602	0.827936	0.860088	0.347695	0.323681	0.15355
2002-08-06	0.782983	0.698006	0.474479	0.775062	0.723129	0.826057	0.860088	0.350099	0.323681	0.155212
2002-08-07	0.779161	0.695877	0.46875	0.769613	0.720241	0.824178	0.859139	0.351352	0.323681	0.158465
2002-08-08	0.78375	0.694813	0.463021	0.765988	0.71832	0.8223	0.859139	0.354608	0.324452	0.167242
2002-08-09	0.784517	0.692153	0.460938	0.760549	0.714477	0.826057	0.858191	0.356562	0.324838	0.176173
2002-08-10	0.78375	0.688428	0.463542	0.764175	0.712556	0.8223	0.856373	0.358615	0.326766	0.184279
2002-08-11	0.782216	0.684703	0.460938	0.753311	0.710641	0.8223	0.855503	0.361421	0.326766	0.188277
2002-08-12	0.779924	0.680979	0.453125	0.74971	0.707776	0.818543	0.854634	0.364226	0.326766	0.190982
2002-08-13	0.778397	0.676722	0.447917	0.746109	0.703957	0.818543	0.852895	0.367231	0.326766	0.195687
2002-08-14	0.776105	0.672997	0.442917	0.742508	0.700149	0.816664	0.851156	0.367231	0.325995	0.197787
2002-08-15	0.773816	0.66874	0.4375	0.740708	0.697303	0.814786	0.849417	0.373944	0.32638	0.201157
2002-08-16	0.771533	0.665016	0.433333	0.737107	0.695405	0.811028	0.849417	0.376148	0.325995	0.207011
2002-08-17	0.769251	0.661823	0.429167	0.733531	0.693507	0.809149	0.848548	0.380857	0.326766	0.208239
2002-08-18	0.770012	0.658099	0.425	0.729955	0.693507	0.809149	0.848548	0.384564	0.32638	0.212353
2002-08-19	0.769251	0.654374	0.421667	0.729955	0.6992	0.80727	0.846288	0.385866	0.32638	0.219337
2002-08-20	0.76849	0.651181	0.4425	0.729955	0.711595	0.809149	0.851156	0.386518	0.32638	0.231272
2002-08-21	0.776105	0.680447	0.480208	0.728167	0.724093	0.809149	0.852895	0.391169	0.325609	0.248846
2002-08-22	0.776869	0.687364	0.490625	0.728167	0.727947	0.805391	0.852895	0.397507	0.325995	0.258117
2002-08-23	0.775341	0.684703	0.492188	0.726379	0.72602	0.803511	0.852026	0.404301	0.325995	0.265678
2002-08-24	0.773816	0.682043	0.492188	0.722802	0.724093	0.801632	0.849417	0.407331	0.325995	0.271047
2002-08-25	0.772294	0.677786	0.492188	0.719226	0.724093	0.797874	0.846288	0.410362	0.324838	0.273194
2002-08-26	0.770012	0.675126	0.492188	0.715674	0.724093	0.795994	0.844029	0.413668	0.324452	0.273597
2002-08-27	0.767729	0.671933	0.492188	0.713897	0.715438	0.792236	0.84064	0.419123	0.324066	0.276826
2002-08-28	0.76621	0.667676	0.491667	0.712121	0.712556	0.788479	0.83951	0.422705	0.323681	0.281372
2002-08-29	0.763934	0.662887	0.491667	0.708568	0.709686	0.784722	0.83838	0.426452	0.323168	0.285565
2002-08-30	0.761659	0.659163	0.491146	0.703239	0.706821	0.784722	0.83838	0.430309	0.323168	0.288028
2002-08-31	0.759384	0.655438	0.491667	0.699698	0.703957	0.780965	0.83725	0.434332	0.323168	0.292403
2002-09-01	0.757873	0.651714	0.491667	0.696169	0.702047	0.784722	0.83725	0.440118	0.323168	0.296786
2002-09-02	0.757118	0.649585	0.501042	0.705015	0.750286	0.797874	0.861985	0.443286	0.324066	0.316357
2002-09-03	0.755607	0.645328	0.469792	0.705015	0.765018	0.795994	0.868782	0.445187	0.323681	0.326226
2002-09-04	0.753341	0.642136	0.396042	0.703239	0.766986	0.794115	0.868782	0.447146	0.323681	0.332065
2002-09-05	0.751077	0.638411	0.407083	0.71745	0.76797	0.792236	0.868782	0.449911	0.325609	0.341376
2002-09-06	0.749572	0.635219	0.414583	0.712121	0.768954	0.790357	0.870838	0.451293	0.32638	0.346821
2002-09-07	0.748819	0.632558	0.420833	0.708568	0.770931	0.788479	0.870838	0.451985	0.32638	0.351911
2002-09-08	0.747313	0.629622	0.421667	0.705015	0.770931	0.788479	0.870838	0.451985	0.325995	0.357123
2002-09-09	0.745054	0.627786	0.425	0.701463	0.76797	0.7866	0.86981	0.451985	0.325609	0.368312
2002-09-10	0.742052	0.626316	0.422917	0.699698	0.766002	0.784722	0.86981	0.451985	0.325223	0.366091
2002-09-11	0.740552	0.623377	0.422083	0.696169	0.764034	0.782843	0.868782	0.452676	0.325223	0.370666
2002-09-12	0.738303	0.620805	0.41875	0.694404	0.761081	0.780965	0.868782	0.452676	0.324838	0.374804
2002-09-13	0.736055	0.618232	0.415833	0.694404	0.762065	0.780965	0.866727	0.452676	0.324838	0.382174
2002-09-14	0.733813	0.616395	0.414583	0.694404	0.766002	0.779086	0.866727	0.454865	0.324838	0.441445
2002-09-15	0.733813	0.616395	0.41375	0.690875	0.769938	0.779086	0.867755	0.45861	0.32638	0.486916
2002-09-16	0.733066	0.614925	0.42	0.690875	0.771924	0.779086	0.871865	0.463276	0.325995	0.510496
2002-09-17	0.733813	0.614558	0.425833	0.690875	0.782854	0.780965	0.874948	0.464889	0.326766	0.518983
2002-09-18	0.732319	0.612353	0.426667	0.687345	0.784846	0.780965	0.877003	0.464082	0.327152	0.524091
2002-09-19	0.730077	0.609781	0.421667	0.683816	0.784846	0.780965	0.875975	0.466502	0.327152	0.539807
2002-09-20	0.727841	0.607209	0.416667	0.68031	0.784846	0.780965	0.874948	0.468921	0.327152	0.529012
2002-09-21	0.725608	0.604637	0.414583	0.676804	0.782854	0.779086	0.872893	0.471514	0.327152	0.541112
2002-09-22	0.723375	0.603535	0.412917	0.673298	0.781859	0.779086	0.871865	0.474106	0.32638	0.549726
2002-09-23	0.721144	0.603535	0.41125	0.669792	0.780863	0.777207	0.870838	0.477563	0.325223	0.55355
2002-09-24	0.718919	0.600227	0.41125	0.666287	0.777881	0.775329	0.86981	0.480207	0.324838	0.560243
2002-09-25	0.718177	0.598023	0.41125	0.662806	0.775895	0.77345	0.868782	0.48153	0.324838	0.567194
2002-09-26	0.715951	0.59692	0.41	0.661066	0.77391	0.771572	0.867755	0.482852	0.324838	0.573763
2002-09-27	0.713729	0.594348	0.40875	0.659326	0.770931	0.77345	0.867755	0.484175	0.325609	0.580477
2002-09-28	0.71299	0.594348	0.4075	0.661066	0.769938	0.771572	0.865779	0.486339	0.325609	0.583295
2002-09-29	0.710774	0.590674	0.406667	0.662806	0.76797	0.769693	0.86483	0.582776	0.332201	0.725533
2002-09-30	0.708557	0.587367	0.4125	0.661066	0.76797	0.767815	0.862933	0.632525	0.367149	0.76434
2002-10-01	0.707079	0.587367	0.41375	0.659326	0.764034	0.765936	0.861036	0.675517	0.384297	0.785138
2002-10-02	0.704134	0.583325	0.412917	0.659326	0.76305	0.767815	0.861036	0.68725	0.400123	0.791369
2002-10-03	0.702662	0.582222	0.412083	0.659326	0.761081	0.771572	0.861985	0.68725	0.408609	0.804194
2002-10-04	0.701189	0.579283	0.41125	0.659326	0.77391	0.771572	0.867755	0.68725	0.416357	0.813404
2002-10-05	0.699717	0.576711	0.41125	0.657585	0.774903	0.771572	0.870838	0.68725	0.421522	0.820298
2002-10-06	0.69825	0.574138	0.410417	0.655845	0.772917	0.769693	0.870838	0.68725	0.425626	0.821839
2002-10-07	0.69605	0.571566	0.410417	0.652365	0.770931	0.769693	0.870838	0.68725	0.429085	0.823755
2002-10-08	0.695317	0.568994	0.410417	0.648884	0.768954	0.769693	0.868782	0.68725	0.431682	0.827465
2002-10-09	0.696783	0.567892	0.440417	0.645426	0.76797	0.769693	0.872893	0.683109	0.43376	0.831523
2002-10-10	0.695317	0.56532	0.440417	0.643696	0.764034	0.767815	0.868782	0.679313	0.435979	0.835877
2002-10-11	0.69385	0.563482	0.440417	0.640238	0.762065	0.767815	0.866727	0.675517	0.437112	0.837734
2002-10-12	0.692384	0.561645	0.440417	0.636779	0.758135	0.767815	0.865779	0.670556	0.438812	0.846245
2002-10-13	0.690923	0.559808	0.440417	0.63505	0.756173	0.765936	0.863882	0.665596	0.439945	0.851682
2002-10-14	0.690923	0.556133	0.445417	0.633321	0.753229	0.765936	0.870838	0.660966	0.4424	0.854837
2002-10-15	0.688001	0.552826	0.445833	0.631591	0.751267	0.765936	0.868782	0.656336	0.444855	0.859856
2002-10-16	0.688001	0.550622	0.446667	0.629874	0.74931	0.762179	0.867755	0.652037	0.446744	0.87403
2002-10-17	0.686541	0.548784	0.447083	0.629874	0.736655	0.7603	0.866727	0.647738	0.448727	0.87716
2002-10-18	0.683625	0.545845	0.447083	0.62644	0.736655	0.7603	0.866727	0.643769	0.449388	0.880554
2002-10-19	0.682169	0.54364	0.446667	0.624722	0.729874	0.758422	0.866727	0.639801	0.45071	0.883947
2002-10-20	0.682169	0.541068	0.449479	0.621288	0.726984	0.758422	0.866727	0.636163	0.452032	0.890268
2002-10-21	0.680713	0.539378	0.453125	0.619571	0.725056	0.756543	0.865779	0.632525	0.455526	0.892797
2002-10-22	0.679258	0.536989	0.455729	0.617854	0.722166	0.754665	0.865779	0.627781	0.457651	0.897155
2002-10-23	0.677802	0.534564	0.455729	0.616136	0.720241	0.754665	0.86483	0.623036	0.456942	0.903141
2002-10-24	0.676352	0.531882	0.456771	0.614419	0.715438	0.75283	0.862933	0.618607	0.456942	0.907378
2002-10-25	0.676352	0.52931	0.457292	0.612714	0.712556	0.75283	0.861036	0.614179	0.458359	0.914422
2002-10-26	0.674901	0.526737	0.457292	0.609305	0.710641	0.750995	0.859139	0.610066	0.461901	0.919341
2002-10-27	0.673451	0.525268	0.457813	0.6076	0.707776	0.750995	0.858191	0.605954	0.462433	0.925244
2002-10-28	0.672	0.523063	0.457813	0.60419	0.704912	0.74916	0.857242	0.602158	0.463495	0.927187
2002-10-29	0.67055	0.521226	0.457292	0.60078	0.702047	0.747325	0.855503	0.598362	0.464027	0.927187
2002-10-30	0.668383	0.519021	0.457292	0.597371	0.6992	0.747325	0.854634	0.594883	0.46567	0.930967
2002-10-31	0.666216	0.516816	0.457813	0.593984	0.696354	0.74549	0.852895	0.591403	0.466829	0.933192
2002-11-01	0.664772	0.514244	0.458333	0.590598	0.692558	0.743655	0.852026	0.58709	0.466829	0.933652
2002-11-02	0.662608	0.510937	0.458333	0.587212	0.689728	0.74182	0.851156	0.582776	0.467989	0.934111
2002-11-03	0.661169	0.50763	0.457813	0.583825	0.688785	0.739985	0.850287	0.57875	0.468568	0.93457
2002-11-04	0.661889	0.505793	0.477604	0.582132	0.687842	0.739985	0.850287	0.574724	0.468568	0.935029
2002-11-05	0.66045	0.503221	0.480208	0.582132	0.689728	0.743655	0.850287	0.574724	0.470308	0.935948
2002-11-06	0.661169	0.501016	0.490625	0.60078	0.702047	0.747325	0.861985	0.574724	0.509659	0.93888
2002-11-07	0.661889	0.501016	0.497396	0.619571	0.728911	0.754665	0.871865	0.574724	0.551582	0.996586
2002-11-08	0.661169	0.499546	0.5	0.624722	0.738594	0.758422	0.872893	0.574724	0.585802	0.996586
2002-11-09	0.66045	0.497341	0.502604	0.629874	0.740532	0.762179	0.87392	0.574724	0.607277	0.996586
2002-11-10	0.659731	0.495872	0.503125	0.629874	0.742483	0.764057	0.87392	0.581166	0.62156	0.996586
2002-11-11	0.669105	0.496974	0.451562	0.629874	0.74736	0.767815	0.875975	0.588815	0.630614	0.996586
2002-11-12	0.676352	0.502486	0.467187	0.629874	0.752248	0.769693	0.878109	0.592795	0.636217	0.996586
2002-11-13	0.675627	0.502486	0.469792	0.628157	0.75421	0.771572	0.879216	0.596275	0.640334	0.996586
2002-11-14	0.674901	0.501751	0.470833	0.62644	0.753229	0.771572	0.879216	0.602158	0.643844	0.996586
2002-11-15	0.673451	0.501016	0.471875	0.624722	0.753229	0.771572	0.879216	0.608421	0.645599	0.996586
2002-11-16	0.672726	0.499914	0.473438	0.623005	0.752248	0.769693	0.878109	0.614179	0.647354	0.996586
2002-11-17	0.672	0.498444	0.474479	0.619571	0.751267	0.769693	0.877003	0.621264	0.649176	0.996586
2002-11-18	0.669828	0.496607	0.46875	0.617854	0.74931	0.767815	0.875975	0.627781	0.652011	0.996586
2002-11-19	0.668383	0.494769	0.471875	0.616136	0.74736	0.767815	0.874948	0.636163	0.654846	0.996586
2002-11-20	0.666939	0.492197	0.471875	0.614419	0.745409	0.767815	0.871865	0.642182	0.656736	0.996586
2002-11-21	0.665494	0.489625	0.471875	0.61101	0.742483	0.765936	0.86981	0.647738	0.659706	0.996586
2002-11-22	0.66405	0.486685	0.471875	0.61101	0.740532	0.765936	0.867755	0.673533	0.661731	0.996586
2002-11-23	0.662608	0.484481	0.471875	0.6076	0.738594	0.765936	0.866727	0.660966	0.663756	0.996586
2002-11-24	0.663327	0.481908	0.477083	0.605895	0.737624	0.764057	0.86483	0.668572	0.667806	0.996586
2002-11-25	0.661889	0.480439	0.482292	0.60419	0.734716	0.764057	0.862933	0.675517	0.668564	0.996586
2002-11-26	0.659731	0.478234	0.492708	0.60419	0.732777	0.764057	0.861985	0.677035	0.671595	0.996586
2002-11-27	0.659012	0.476029	0.494792	0.602485	0.729874	0.764057	0.861036	0.678554	0.672352	0.996586
2002-11-28	0.657573	0.474192	0.495312	0.60078	0.727947	0.762179	0.860088	0.683109	0.67311	0.996586
2002-11-29	0.656134	0.471987	0.495312	0.599075	0.72602	0.762179	0.857242	0.684765	0.675383	0.996586
2002-11-30	0.653984	0.47015	0.495312	0.597371	0.723129	0.762179	0.856373	0.686421	0.677862	0.996586
2002-12-01	0.652551	0.467945	0.495312	0.595677	0.720241	0.762179	0.855503	0.688906	0.677862	0.996586
2002-12-02	0.6504	0.465741	0.495833	0.592291	0.716399	0.762179	0.853765	0.688906	0.678689	0.996586
2002-12-03	0.648253	0.463903	0.495833	0.590598	0.713517	0.762179	0.852026	0.688906	0.679515	0.996586
2002-12-04	0.646826	0.461699	0.495833	0.585518	0.710641	0.7603	0.850287	0.690562	0.681168	0.996586
2002-12-05	0.645398	0.459495	0.495833	0.583825	0.707776	0.7603	0.848548	0.691391	0.681995	0.996586
2002-12-06	0.643257	0.45729	0.495833	0.582132	0.705867	0.7603	0.846288	0.694979	0.684543	0.996586
2002-12-07	0.642543	0.455085	0.503646	0.582132	0.703002	0.7603	0.846288	0.720377	0.714122	0.996586
2002-12-08	0.642543	0.45435	0.505208	0.587212	0.706821	0.767815	0.846288	0.746999	0.740819	0.996586
2002-12-09	0.646826	0.459862	0.550521	0.628157	0.743458	0.7866	0.862933	0.862719	0.864905	0.996586
2002-12-10	0.648253	0.463169	0.563542	0.638508	0.76305	0.803511	0.870838	0.901385	0.903111	0.996586
2002-12-11	0.649684	0.465373	0.573958	0.648884	0.772917	0.805391	0.874948	0.88097	0.88008	0.996586
2002-12-12	0.649684	0.467578	0.576562	0.648884	0.777881	0.80727	0.878109	0.909294	0.809621	0.996586
2002-12-13	0.649684	0.469048	0.577083	0.648884	0.778874	0.80727	0.879216	0.924806	0.741802	0.996586
2002-12-14	0.648253	0.469783	0.577083	0.648884	0.777881	0.80727	0.880322	0.953348	0.711543	0.996586
2002-12-15	0.647539	0.470885	0.577083	0.648884	0.775895	0.80727	0.882536	0.953348	0.717213	0.996586
2002-12-16	0.646112	0.471987	0.586979	0.648884	0.774903	0.809149	0.883642	0.9764	0.725363	0.996586
2002-12-17	0.645398	0.473457	0.592187	0.647155	0.77391	0.811028	0.885855	0.999992	0.752973	0.996586
2002-12-18	0.644684	0.473825	0.593229	0.645426	0.771924	0.811028	0.886962	0.999992	0.723677	0.996586
2002-12-19	0.643257	0.473825	0.59375	0.647155	0.768954	0.811028	0.889254	0.999992	0.717213	0.996586
2002-12-20	0.646826	0.476029	0.621042	0.650624	0.77391	0.8223	0.892811	0.999992	0.71644	0.996586
2002-12-21	0.648967	0.480806	0.622917	0.659326	0.775895	0.8223	0.895182	0.999992	0.714122	0.996586
2002-12-22	0.648967	0.482643	0.622917	0.659326	0.774903	0.8223	0.896368	0.999992	0.705344	0.996586
2002-12-23	0.648253	0.483746	0.639792	0.659326	0.771924	0.8223	0.899925	0.999992	0.702245	0.996586
2002-12-24	0.648967	0.48595	0.646042	0.659326	0.770931	0.826057	0.902679	0.999992	0.704311	0.996586
2002-12-25	0.651117	0.493299	0.654167	0.659326	0.771924	0.827936	0.904516	0.999992	0.70128	0.996586
2002-12-26	0.651117	0.495872	0.656667	0.661066	0.771924	0.827936	0.907271	0.999992	0.699352	0.996586
2002-12-27	0.6504	0.497341	0.657292	0.661066	0.769938	0.827936	0.908189	0.999992	0.703278	0.996586
2002-12-28	0.649684	0.498811	0.657292	0.661066	0.769938	0.829814	0.908189	0.999992	0.707411	0.996586
2002-12-29	0.648253	0.499914	0.657292	0.662806	0.766986	0.829814	0.908189	0.999992	0.707411	0.996586
2002-12-30	0.647539	0.500281	0.661667	0.664546	0.759116	0.829814	0.911111	0.999992	0.712576	0.996586
2002-12-31	0.646112	0.501383	0.667917	0.664546	0.755191	0.831693	0.909107	0.999992	0.72199	0.996586
2003-01-01	0.643971	0.501016	0.669792	0.664546	0.750286	0.833571	0.911111	0.999992	0.72199	0.996586
2003-01-02	0.648253	0.501016	0.702292	0.673298	0.750286	0.842964	0.916119	0.999992	0.717986	0.996586
2003-01-03	0.648967	0.501016	0.711667	0.675051	0.755191	0.844843	0.92021	0.999992	0.692602	0.996586
2003-01-04	0.651117	0.501016	0.711667	0.676804	0.755191	0.8486	0.924551	0.999992	0.695495	0.996586
2003-01-05	0.653984	0.501751	0.711667	0.682063	0.753229	0.854236	0.925636	0.999992	0.702245	0.987992
2003-01-06	0.657573	0.502486	0.730417	0.692639	0.74931	0.856114	0.927806	0.999992	0.707411	0.984365
2003-01-07	0.658292	0.502118	0.736042	0.694404	0.743458	0.857993	0.928891	0.999992	0.712576	0.978478
2003-01-08	0.66045	0.502853	0.741667	0.701463	0.740532	0.86175	0.934651	0.999992	0.714895	0.974331
2003-01-09	0.659012	0.503221	0.746042	0.708568	0.746384	0.865507	0.936989	0.999992	0.719532	0.970558
2003-01-10	0.66045	0.505058	0.747292	0.71745	0.746384	0.867386	0.940495	0.999992	0.722833	0.96679
2003-01-11	0.659012	0.505793	0.747917	0.722802	0.743458	0.869264	0.942916	0.999992	0.72452	0.954298
2003-01-12	0.657573	0.50616	0.747917	0.726379	0.741508	0.869264	0.944168	0.999992	0.736041	0.941982
2003-01-13	0.659012	0.50763	0.757292	0.735319	0.742483	0.8749	0.947924	0.999992	0.764545	0.984443
2003-01-14	0.658292	0.506895	0.760417	0.738908	0.740532	0.878657	0.949177	0.999992	0.747704	0.972691
2003-01-15	0.656854	0.505425	0.762292	0.742508	0.736655	0.878657	0.950429	0.999992	0.722833	0.966068
2003-01-16	0.656134	0.503955	0.762917	0.74971	0.729874	0.880536	0.951681	0.999992	0.71644	0.955578
2003-01-17	0.654701	0.501751	0.766667	0.753311	0.724093	0.880536	0.951681	0.999992	0.720304	0.950016
2003-01-18	0.653267	0.502486	0.767292	0.756924	0.716399	0.882414	0.951681	0.999992	0.720304	0.940274
2003-01-19	0.652551	0.503221	0.767292	0.762362	0.711595	0.882414	0.952933	0.999992	0.71051	0.929912
2003-01-20	0.651117	0.503955	0.771042	0.7678	0.703957	0.884293	0.954185	0.999992	0.702245	0.917392
2003-01-21	0.656134	0.53416	0.772292	0.771426	0.696354	0.886171	0.952933	0.999992	0.703278	0.906073
2003-01-22	0.655418	0.535777	0.772917	0.775062	0.690672	0.886171	0.952933	0.999992	0.705344	0.891758
2003-01-23	0.653984	0.536585	0.772917	0.77871	0.683127	0.886171	0.951681	0.999992	0.707411	0.874744
2003-01-24	0.653984	0.538055	0.775417	0.786005	0.677503	0.886171	0.952933	0.999992	0.711543	0.859543
2003-01-25	0.653267	0.538055	0.776042	0.789653	0.67096	0.886171	0.951681	0.999992	0.714122	0.84355
2003-01-26	0.651834	0.538386	0.777292	0.793313	0.663512	0.886171	0.950429	0.999992	0.71644	0.833465
2003-01-27	0.6504	0.538716	0.777917	0.796985	0.656085	0.886171	0.949177	0.999992	0.725363	0.829679
2003-01-28	0.649684	0.538386	0.778542	0.800658	0.657013	0.886171	0.955155	0.999992	0.72199	0.853699
2003-01-29	0.648253	0.539047	0.779167	0.806166	0.666303	0.891809	0.955155	0.999992	0.719532	0.871514
2003-01-30	0.648253	0.539047	0.782292	0.809838	0.669098	0.895567	0.960975	0.999992	0.721147	0.878428
2003-01-31	0.649684	0.5407	0.786667	0.828317	0.685013	0.897447	0.981345	0.999992	0.730561	0.900017
2003-02-01	0.651834	0.54511	0.795312	0.884474	0.729874	0.971268	1	0.999992	0.717986	0.996586
2003-02-02	0.655418	0.550622	0.802604	0.905335	0.746384	0.959775	1	0.999992	0.731475	0.996586
2003-02-03	0.667661	0.561645	0.882917	0.953288	0.785842	0.96169	1	0.999992	0.678689	0.996586
2003-02-04	0.67853	0.574138	0.828125	0.966843	0.80891	0.938778	1	0.999992	0.696459	0.996586
2003-02-05	0.682169	0.58112	0.817187	0.972672	0.823079	0.940656	1	0.999992	0.71051	0.996586
2003-02-06	0.690193	0.587734	0.842708	0.988266	0.837369	0.957859	1	0.999992	0.858805	0.996586
2003-02-07	0.711512	0.606107	0.89375	0.970729	0.870413	0.969352	1	0.999992	0.702245	0.996586
2003-02-08	0.763176	0.657567	0.914583	0.970729	0.913511	0.933142	1	0.999992	0.699352	0.996586
2003-02-09	0.780688	0.677786	0.922917	0.972672	0.939132	0.933142	1	0.999992	0.712576	0.996586
2003-02-10	0.787584	0.687364	0.87625	0.980443	0.945582	0.942535	1	0.999992	0.720304	0.996586
2003-02-11	0.793732	0.693749	0.88125	0.974614	0.949893	0.952113	1	0.999992	0.729648	0.996586
2003-02-12	0.798351	0.69907	0.884583	0.972672	0.957444	0.957859	1	0.999992	0.722833	0.996586
2003-02-13	0.814604	0.712904	0.965625	0.970729	0.962862	0.969352	1	0.999992	0.714895	0.996586
2003-02-14	0.845906	0.746426	0.92625	0.980443	0.980277	0.952113	1	0.999992	0.70128	0.996586
2003-02-15	0.860153	0.76026	0.910417	0.970729	0.957444	0.923749	1	0.999992	0.702245	0.996586
2003-02-16	0.865726	0.76771	0.907917	0.974614	0.944507	0.929385	1	0.999992	0.703278	0.996586
2003-02-17	0.870513	0.772499	0.920417	0.976557	0.939132	0.936899	1	0.999992	0.721147	0.996586
2003-02-18	0.874511	0.777819	0.93125	0.980443	0.930557	0.946366	1	0.999992	0.72452	0.996586
2003-02-19	0.881731	0.784737	0.810625	0.972672	0.924143	0.952113	1	0.999992	0.713349	0.996586
2003-02-20	0.890377	0.791122	0.831771	0.972672	0.924143	0.954028	1	0.999992	0.709477	0.996586
2003-02-21	0.895947	0.796443	0.84125	0.972672	0.92735	0.955944	1	0.999992	0.708444	0.996586
2003-02-22	0.898845	0.799103	0.842708	0.9785	0.92735	0.955944	1	0.999992	0.707411	0.996586
2003-02-23	0.902732	0.801764	0.845625	0.974614	0.928419	0.948282	1	0.999992	0.707411	0.996586
2003-02-24	0.910053	0.804956	0.88375	0.970729	0.92735	0.942535	1	0.999992	0.703278	0.996586
2003-02-25	0.912502	0.807617	0.897917	0.976557	0.92735	0.929385	1	0.999992	0.709477	0.996586
2003-02-26	0.915767	0.809213	0.907917	0.9785	0.9167	0.882414	1	0.999992	0.714895	0.996586
2003-02-27	0.91904	0.811873	0.879583	0.9785	0.907149	0.876778	1	0.999992	0.720304	0.996586
2003-02-28	0.921498	0.81613	0.897917	0.9785	0.906089	0.880536	1	0.999992	0.725363	0.996586
2003-03-01	0.928889	0.818791	0.927083	0.984354	0.90821	0.88993	1	0.999992	0.725363	0.996586
2003-03-02	0.939608	0.823579	0.947083	0.992177	0.925212	0.908721	1	0.999992	0.742786	0.996586
2003-03-03	0.957047	0.828368	0.939583	0.988266	0.941282	0.933142	1	0.999992	0.749811	0.996586
2003-03-04	0.97884	0.846991	0.93125	0.982398	0.960695	0.948282	1	0.999992	0.736955	0.996586
2003-03-05	0.997452	0.876257	0.952083	0.976557	0.974824	0.952113	1	0.999992	0.717213	0.996586
2003-03-06	1	0.926807	0.94375	0.980443	0.985739	0.940656	1	0.999992	0.713349	0.996586
2003-03-07	1	0.956073	0.954167	0.970729	0.98137	0.938778	1	0.999992	0.72199	0.996586
2003-03-08	1	0.969908	0.963542	0.976557	0.980277	0.946366	1	0.999992	0.733301	0.996586
2003-03-09	1	0.981614	0.978125	0.982398	0.986832	0.954028	1	0.999992	0.742786	0.996586
2003-03-10	1	0.988531	0.979167	0.990221	0.989017	0.96169	1	0.999992	0.751919	0.996586
2003-03-11	1	0.995449	0.98125	0.996089	0.960695	0.967437	1	0.999992	0.762182	0.996586
2003-03-12	1	0.999794	0.979167	1	0.94666	0.973183	1	0.999992	0.76956	0.996586
2003-03-13	1	1	0.979167	1	0.942357	0.977014	1	0.999992	0.77658	0.996586
2003-03-14	1	1	0.979167	1	0.935908	0.973183	1	0.999992	0.785032	0.996586
2003-03-15	1	1	0.965625	1	0.945582	0.96169	1	0.999992	0.789044	0.996586
2003-03-16	1	1	0.965625	0.996089	0.945582	0.963606	1	0.999992	0.794058	0.996586
2003-03-17	1	1	0.965625	1	0.944507	0.967437	1	0.999992	0.817214	0.996586
2003-03-18	1	1	0.947917	1	0.941282	0.971268	1	0.999992	0.828239	0.996586
2003-03-19	1	1	0.963542	1	0.936983	0.977014	1	0.999992	0.837219	0.996586
2003-03-20	1	1	0.9625	1	0.932695	0.977014	1	0.999992	0.847878	0.996586
2003-03-21	1	1	0.970833	1	0.928419	0.97893	1	0.999992	0.854714	0.996586
2003-03-22	1	1	0.976042	1	0.925212	0.975099	1	0.999992	0.864905	0.996586
2003-03-23	1	1	0.983333	1	0.91989	0.971268	1	0.999992	0.871302	0.996586
2003-03-24	1	1	0.985417	1	0.915637	0.971268	1	0.999992	0.877104	0.996586
2003-03-25	1	1	0.988542	1	0.91033	0.977014	1	0.999992	0.886328	0.996586
2003-03-26	1	1	0.991667	1	0.907149	0.97893	1	0.999992	0.895031	0.996586
2003-03-27	1	1	0.992708	1	0.905029	0.980845	1	0.999992	0.908111	0.996586
2003-03-28	0.999151	1	0.995833	1	0.902908	0.982761	1	0.999992	0.916218	0.996586
2003-03-29	0.997452	1	0.997917	1	0.9008	0.982761	1	0.999992	0.923946	0.996586
2003-03-30	0.996603	1	0.998958	1	0.898691	0.984676	1	0.999992	0.931068	0.996586
2003-03-31	0.994904	1	1	1	0.897636	0.984676	1	0.999992	0.938493	0.996586
2003-04-01	0.994055	1	1	1	0.896582	0.984676	1	0.999992	0.941902	0.996586
2003-04-02	0.994055	1	0.994792	1	0.896582	0.986592	1	0.999992	0.9541	0.996586
2003-04-03	0.994904	1	1	1	0.897636	0.988507	1	0.999992	0.955798	0.996586
2003-04-04	0.994904	1	1	1	0.901854	0.984676	1	0.999992	0.962046	0.996586
2003-04-05	0.994904	1	1	1	0.902908	0.984676	1	0.999992	0.969606	0.996586
2003-04-06	0.998301	1	1	1	0.91033	0.992338	1	0.999992	0.9541	0.996586
2003-04-07	0.996603	1	0.994792	1	0.91989	0.988507	1	0.999992	0.966675	0.999945
2003-04-08	0.997452	1	1	1	0.931626	0.984676	1	0.999992	0.969606	0.999945
2003-04-09	0.999151	1	1	1	0.944507	0.980845	1	0.999992	0.968603	0.999945
2003-04-10	0.999151	1	1	1	0.949893	0.982761	1	0.999992	0.980869	0.999945
2003-04-11	0.999151	1	1	1	0.950971	0.984676	1	0.999992	0.9919	0.999945
2003-04-12	1	1	1	1	0.953127	0.986592	1	0.999992	1	0.999945
2003-04-13	1	1	1	1	0.952049	0.988507	1	0.999992	1	0.999945
2003-04-14	1	1	1	1	0.953127	1	1	0.999992	1	0.999945
2003-04-15	1	1	1	1	0.95636	1	1	0.999992	1	0.999945
2003-04-16	1	1	1	1	0.958527	0.984676	1	0.999992	1	0.999945
2003-04-17	1	1	1	1	0.958527	0.975099	1	0.999992	1	0.999945
2003-04-18	1	1	1	1	0.959611	0.975099	1	0.999992	1	0.999945
2003-04-19	1	1	1	1	0.961778	0.97893	1	0.999992	1	0.999945
2003-04-20	1	1	1	1	0.978092	0.97893	1	0.999992	1	0.999945
2003-04-21	1	1	1	1	0.987924	0.97893	1	0.999992	1	0.999945
2003-04-22	1	1	0.998958	1	0.991213	0.980845	1	0.999992	1	0.999945
2003-04-23	1	1	0.994792	1	0.99341	0.980845	1	0.999992	1	0.999945
2003-04-24	1	1	1	1	0.994508	0.982761	1	0.999992	1	0.999945
2003-04-25	1	1	1	1	0.990115	0.982761	1	0.999992	1	0.999945
2003-04-26	1	1	1	1	0.983554	0.984676	1	0.999992	1	0.999945
2003-04-27	1	1	1	1	0.975913	0.984676	1	0.999992	1	0.999945
2003-04-28	1	1	1	1	0.968286	0.984676	1	0.999992	1	0.999945
2003-04-29	1	1	1	1	0.960695	0.984676	1	0.999992	1	0.999945
2003-04-30	0.999151	1	1	1	0.957444	0.984676	1	0.999992	1	0.999945
2003-05-01	0.998301	0.999971	1	1	0.954204	0.984676	1	0.999992	1	0.999945
2003-05-02	0.997452	0.999882	1	1	0.952049	0.984676	1	0.999992	1	0.999945
2003-05-03	0.995754	0.999794	1	1	0.949893	0.984676	1	0.999992	1	0.999945
2003-05-04	0.994055	0.999706	1	1	0.947737	0.982761	0.995779	0.999992	1	0.999945
2003-05-05	0.992356	0.997578	1	1	0.94666	0.982761	0.994372	0.999992	1	0.999945
2003-05-06	0.990662	0.994917	1	0.998044	0.943432	0.982761	0.991559	0.999992	1	0.999945
2003-05-07	0.989816	0.993853	1	0.996089	0.940207	0.982761	0.988745	0.999992	1	0.999945
2003-05-08	0.988125	0.991724	1	0.996089	0.938058	0.980845	0.988745	0.999992	1	0.999945
2003-05-09	0.98728	0.989063	1	0.992177	0.933764	0.97893	0.985931	0.999992	1	0.999945
2003-05-10	0.985589	0.986403	0.996875	0.990221	0.931626	0.977014	0.984784	0.999992	1	0.996586
2003-05-11	0.983898	0.983742	0.996875	0.98631	0.929488	0.975099	0.983638	0.999992	1	0.996586
2003-05-12	0.983052	0.981614	0.996875	0.984354	0.926281	0.973183	0.981345	0.999992	1	0.996586
2003-05-13	0.97884	0.978953	0.991667	0.982398	0.923079	0.971268	0.980199	0.999992	1	0.996586
2003-05-14	0.97547	0.976825	0.991667	0.980443	0.920953	0.969352	0.979053	0.999992	1	0.996586
2003-05-15	0.974627	0.976825	0.9875	0.9785	0.918827	0.967437	0.977906	0.999992	1	0.996586
2003-05-16	0.973788	0.971504	0.9875	0.976557	0.915637	0.967437	0.975613	0.999992	1	0.996586
2003-05-17	0.972949	0.968312	0.98125	0.974614	0.912451	0.965521	0.974467	0.999992	1	0.99341
2003-05-18	0.97211	0.965651	0.98125	0.972672	0.90927	0.963606	0.974467	0.999992	1	0.981966
2003-05-19	0.971271	0.962991	0.98125	0.970729	0.907149	0.96169	0.972351	0.999992	1	0.965067
2003-05-20	0.967914	0.959798	0.98125	0.968786	0.903969	0.959775	0.969176	0.999992	1	0.943076
2003-05-21	0.967075	0.957138	0.973958	0.966843	0.9008	0.959775	0.96706	0.999992	1	0.919006
2003-05-22	0.966236	0.954477	0.973958	0.966843	0.897636	0.957859	0.96706	0.999992	1	0.895356
2003-05-23	0.965401	0.951816	0.966667	0.9649	0.893419	0.955944	0.968118	0.999992	1	0.884458
2003-05-24	0.962893	0.949155	0.966667	0.9649	0.891316	0.954028	0.970234	0.999992	1	0.86465
2003-05-25	0.961222	0.946495	0.960417	0.962958	0.88817	0.952113	0.968118	0.993898	1	0.845811
2003-05-26	0.959551	0.944899	0.960417	0.962958	0.885025	0.950197	0.96706	0.99146	1	0.827017
2003-05-27	0.958715	0.942238	0.955208	0.962958	0.882928	0.948282	0.966002	0.989023	1	0.811022
2003-05-28	0.956214	0.939046	0.955208	0.962958	0.881879	0.946366	0.964943	0.985523	1	0.788877
2003-05-29	0.954548	0.936385	0.94625	0.962958	0.878751	0.944451	0.962915	0.982102	1	0.768603
2003-05-30	0.952883	0.933193	0.945417	0.962958	0.876666	0.944451	0.962915	0.978681	1	0.74942
2003-05-31	0.95205	0.931064	0.942917	0.962958	0.872495	0.942535	0.962915	0.975341	1	0.731548
2003-06-01	0.949552	0.92734	0.940417	0.962958	0.868333	0.940656	0.959035	0.972165	1	0.710766
2003-06-02	0.947893	0.924632	0.93875	0.962958	0.863134	0.938778	0.957095	0.968988	1	0.690985
2003-06-03	0.945405	0.92116	0.90875	0.962958	0.862095	0.936899	0.955155	0.968988	1	0.677692
2003-06-04	0.943747	0.918453	0.90875	0.962958	0.858987	0.935021	0.952933	0.970047	1	0.721468
2003-06-05	0.942088	0.91554	0.907917	0.961015	0.854852	0.933142	0.952933	0.971106	1	0.725203
2003-06-06	0.938782	0.91244	0.907083	0.95522	0.850716	0.931264	0.954185	0.971106	1	0.70789
2003-06-07	0.937131	0.908715	0.90125	0.951356	0.846604	0.929385	0.951681	0.974282	1	0.714035
2003-06-08	0.934655	0.906055	0.90125	0.947493	0.84352	0.927506	0.949177	0.9764	1	0.732368
2003-06-09	0.933004	0.902862	0.900417	0.94363	0.839414	0.923749	0.947924	0.982102	1	0.73961
2003-06-10	0.930535	0.89967	0.892917	0.939778	0.835325	0.918114	0.946672	0.999992	1	0.749789
2003-06-11	0.928066	0.895945	0.892083	0.937859	0.832258	0.916235	0.944168	0.999992	1	0.755624
2003-06-12	0.92642	0.892753	0.892083	0.93402	0.829195	0.912478	0.940495	0.999992	1	0.764709
2003-06-13	0.923955	0.88956	0.884583	0.930182	0.825118	0.908721	0.936989	0.999992	1	0.772671
2003-06-14	0.921498	0.886367	0.882917	0.926343	0.82206	0.904964	0.934651	0.999992	1	0.777632
2003-06-15	0.919859	0.883175	0.882083	0.924424	0.819011	0.903084	0.932314	0.999992	1	0.789339
2003-06-16	0.917402	0.87945	0.882083	0.920597	0.814969	0.899326	0.931145	0.999992	1	0.795482
2003-06-17	0.915767	0.875725	0.872917	0.916781	0.81699	0.897447	0.927806	0.999992	1	0.804262
2003-06-18	0.912502	0.872	0.870417	0.912966	0.80891	0.895567	0.924551	0.999992	1	0.810586
2003-06-19	0.91087	0.868276	0.869583	0.909151	0.803872	0.893688	0.92238	0.999992	1	0.813694
2003-06-20	0.908421	0.864551	0.860208	0.905335	0.800849	0.891809	0.919125	0.999992	1	0.817361
2003-06-21	0.905983	0.860294	0.858021	0.901532	0.797839	0.88805	0.917121	0.999992	1	0.819915
2003-06-22	0.903545	0.857101	0.858021	0.897742	0.794833	0.884293	0.916119	0.999992	1	0.828062
2003-06-23	0.901919	0.853909	0.857292	0.893951	0.790827	0.882414	0.912112	0.999992	1	0.830807
2003-06-24	0.899569	0.849652	0.847812	0.888265	0.787834	0.880536	0.911111	0.999992	1	0.834363
2003-06-25	0.89812	0.846459	0.847083	0.882591	0.784846	0.876778	0.909107	0.999992	1	0.837109
2003-06-26	0.895947	0.842203	0.839063	0.878823	0.780863	0.8749	0.908189	0.999992	1	0.839978
2003-06-27	0.893774	0.83901	0.839063	0.875056	0.777881	0.871143	0.907271	0.999992	1	0.843988
2003-06-28	0.891268	0.834753	0.835417	0.871289	0.77391	0.869264	0.905434	0.999992	1	0.846253
2003-06-29	0.889486	0.830497	0.8325	0.863766	0.769938	0.865507	0.903598	0.999992	1	0.853502
2003-06-30	0.886813	0.827304	0.829583	0.860022	0.766986	0.863628	0.901761	0.999992	1	0.857044
2003-07-01	0.88414	0.823047	0.822292	0.856279	0.762065	0.859871	0.898739	0.999992	1	0.859886
2003-07-02	0.881731	0.819323	0.820833	0.852535	0.759116	0.857993	0.896368	0.999992	1	0.862192
2003-07-03	0.879322	0.815598	0.812813	0.846919	0.756173	0.854236	0.892811	0.999992	1	0.862769
2003-07-04	0.876913	0.811873	0.812083	0.843199	0.752248	0.852357	0.889254	0.999992	1	0.865252
2003-07-05	0.874511	0.807617	0.809167	0.839478	0.74931	0.850478	0.885855	0.999992	1	0.869067
2003-07-06	0.872912	0.803892	0.806979	0.835758	0.745409	0.846721	0.882536	0.999992	1	0.87155
2003-07-07	0.870513	0.801232	0.804792	0.832038	0.741508	0.844843	0.879216	0.999992	1	0.875365
2003-07-08	0.868115	0.797507	0.798958	0.830177	0.738594	0.841086	0.877003	0.999992	1	0.880551
2003-07-09	0.865726	0.793782	0.798958	0.826469	0.735685	0.839207	0.87392	0.999992	1	0.883926
2003-07-10	0.863337	0.790058	0.798229	0.822774	0.730838	0.83545	0.87392	0.999992	1	0.888013
2003-07-11	0.860949	0.785269	0.789167	0.81723	0.726984	0.831693	0.870838	0.999992	1	0.890674
2003-07-12	0.858567	0.782076	0.785417	0.811686	0.723129	0.829814	0.86981	0.999992	1	0.893335
2003-07-13	0.856982	0.777819	0.782917	0.808002	0.720241	0.827936	0.865779	0.999992	1	0.893952
2003-07-14	0.854603	0.774095	0.779792	0.80433	0.714477	0.824178	0.862933	0.999992	1	0.89649
2003-07-15	0.852225	0.77037	0.778542	0.800658	0.707776	0.820421	0.861036	0.999992	1	0.89841
2003-07-16	0.849855	0.768242	0.772917	0.796985	0.6992	0.818543	0.859139	0.999992	1	0.899398
2003-07-17	0.847486	0.765049	0.770417	0.793313	0.687842	0.814786	0.856373	0.999992	1	0.901318
2003-07-18	0.845116	0.760792	0.765417	0.789653	0.675629	0.811028	0.853765	0.999992	1	0.903238
2003-07-19	0.842754	0.757068	0.760417	0.786005	0.663512	0.809149	0.852026	0.999992	1	0.905652
2003-07-20	0.841181	0.752811	0.759792	0.784182	0.651466	0.80727	0.848548	0.999992	1	0.904226
2003-07-21	0.838822	0.749619	0.759167	0.782358	0.639513	0.805391	0.846288	0.999992	1	0.890557
2003-07-22	0.836462	0.745362	0.752292	0.77871	0.626746	0.801632	0.842899	0.999992	1	0.892921
2003-07-23	0.834113	0.741105	0.751667	0.776886	0.615877	0.797874	0.84064	0.999992	1	0.892921
2003-07-24	0.832547	0.73738	0.751042	0.775062	0.604206	0.795994	0.83725	0.999992	1	0.893999
2003-07-25	0.830198	0.733656	0.749167	0.773239	0.593498	0.792236	0.835141	0.999992	1	0.896502
2003-07-26	0.827852	0.729399	0.746667	0.769613	0.58199	0.790357	0.831978	0.999992	1	0.898467
2003-07-27	0.82551	0.725674	0.745417	0.765988	0.570565	0.7866	0.829869	0.999992	1	0.899006
2003-07-28	0.823949	0.72195	0.744792	0.762362	0.560979	0.784722	0.826706	0.999992	1	0.899545
2003-07-29	0.821608	0.717693	0.737292	0.760549	0.552309	0.780965	0.823769	0.999992	1	0.899545
2003-07-30	0.819272	0.713968	0.734167	0.756924	0.547989	0.777207	0.820831	0.999992	1	0.900623
2003-07-31	0.817716	0.710244	0.732292	0.753311	0.544557	0.775329	0.818873	0.999992	1	0.900623
2003-08-01	0.815382	0.705987	0.728542	0.74971	0.541124	0.771572	0.816011	0.999992	1	0.903217
2003-08-02	0.813048	0.702262	0.722917	0.746109	0.536851	0.769693	0.814203	0.999992	1	0.903801
2003-08-03	0.811498	0.698006	0.718542	0.742508	0.533442	0.767815	0.811492	0.999992	1	0.903801
2003-08-04	0.809174	0.694281	0.713542	0.738908	0.530035	0.765936	0.809684	0.999992	1	0.904969
2003-08-05	0.806849	0.690556	0.712292	0.735319	0.525789	0.762179	0.80622	0.999992	1	0.906978
2003-08-06	0.804527	0.685767	0.711667	0.729955	0.522391	0.758422	0.804563	0.999992	1	0.906978
2003-08-07	0.802983	0.681511	0.709167	0.726379	0.519861	0.754665	0.803734	0.999992	1	0.907563
2003-08-08	0.800667	0.677786	0.708542	0.722802	0.5148	0.750995	0.801249	0.999992	1	0.907563
2003-08-09	0.798351	0.674061	0.704167	0.719226	0.511443	0.747325	0.799592	0.999992	1	0.908146
2003-08-10	0.79604	0.669273	0.703542	0.713897	0.50893	0.74549	0.795295	0.999992	1	0.905037
2003-08-11	0.794501	0.666612	0.702917	0.708568	0.504748	0.74182	0.790999	0.999992	1	0.905037
2003-08-12	0.792193	0.662355	0.702917	0.703239	0.50142	0.73815	0.788851	0.999992	1	0.903611
2003-08-13	0.790654	0.658099	0.694167	0.699698	0.498925	0.73448	0.78484	0.999992	1	0.904239
2003-08-14	0.788351	0.654906	0.694167	0.696169	0.494784	0.73081	0.78083	0.999992	1	0.904239
2003-08-15	0.786051	0.651181	0.693542	0.690875	0.49148	0.727141	0.777782	0.999992	1	0.901578
2003-08-16	0.78375	0.646925	0.684792	0.687345	0.489002	0.725306	0.775694	0.999992	1	0.902207
2003-08-17	0.782216	0.642668	0.684792	0.683816	0.485722	0.721636	0.772563	0.999992	1	0.902207
2003-08-18	0.780688	0.638411	0.679167	0.68031	0.481621	0.717966	0.769433	0.999992	1	0.903537
2003-08-19	0.778397	0.634687	0.679167	0.676804	0.479167	0.716131	0.766896	0.999992	1	0.902207
2003-08-20	0.776105	0.63109	0.670417	0.671545	0.476716	0.712461	0.764656	0.999992	1	0.902835
2003-08-21	0.773816	0.628154	0.667292	0.666287	0.47263	0.708791	0.762416	0.999992	1	0.902835
2003-08-22	0.771533	0.625214	0.658542	0.662806	0.468573	0.706956	0.760135	0.999992	1	0.902835
2003-08-23	0.769251	0.622642	0.658542	0.657585	0.466139	0.703286	0.75856	0.999992	1	0.904093
2003-08-24	0.767729	0.619702	0.654792	0.654105	0.462906	0.699617	0.756197	0.999992	1	0.904093
2003-08-25	0.765451	0.616395	0.649792	0.650624	0.458879	0.697782	0.753833	0.999992	1	0.904722
2003-08-26	0.763176	0.613823	0.642917	0.647155	0.455663	0.694112	0.751109	0.999992	1	0.904722
2003-08-27	0.761659	0.611618	0.642292	0.643696	0.452465	0.690442	0.749171	0.999992	1	0.904722
2003-08-28	0.760142	0.609046	0.639167	0.640238	0.449266	0.686772	0.746266	0.999992	1	0.907384
2003-08-29	0.757118	0.606107	0.638542	0.63505	0.44528	0.684937	0.74336	0.999992	1	0.907384
2003-08-30	0.754852	0.603167	0.631667	0.629874	0.442094	0.681267	0.740648	0.999992	1	0.90881
2003-08-31	0.752585	0.600227	0.631667	0.62644	0.438137	0.677599	0.737032	0.999992	1	0.890997
2003-09-01	0.751077	0.597288	0.630417	0.621288	0.435773	0.675765	0.736128	0.999992	1	0.90402
2003-09-02	0.748066	0.594348	0.619792	0.617854	0.431837	0.672096	0.735224	0.999992	1	0.90402
2003-09-03	0.74656	0.591409	0.619167	0.614419	0.429482	0.668428	0.735224	0.999992	1	0.90402
2003-09-04	0.744302	0.589204	0.619167	0.61101	0.425557	0.666593	0.737032	0.999992	1	0.906609
2003-09-05	0.744302	0.589571	0.616042	0.609305	0.425557	0.662925	0.737936	0.999992	1	0.910606
2003-09-06	0.743552	0.587367	0.607917	0.605895	0.422444	0.66109	0.737936	0.999992	1	0.911954
2003-09-07	0.741302	0.585162	0.606042	0.60419	0.420115	0.65742	0.737032	0.999992	1	0.911954
2003-09-08	0.739052	0.582957	0.609792	0.60078	0.417787	0.655585	0.73348	0.999992	1	0.913958
2003-09-09	0.737553	0.580753	0.6	0.593984	0.4147	0.65375	0.731801	0.999992	1	0.914632
2003-09-10	0.736055	0.57818	0.6	0.590598	0.412389	0.651915	0.730962	0.999992	1	0.915306
2003-09-11	0.733066	0.576343	0.599479	0.587212	0.408543	0.648245	0.730122	0.999992	1	0.916912
2003-09-12	0.731571	0.574138	0.591667	0.583825	0.40625	0.648245	0.729283	0.999992	1	0.917447
2003-09-13	0.730824	0.572669	0.594792	0.580439	0.403957	0.64641	0.728444	0.999992	1	0.917982
2003-09-14	0.728585	0.570831	0.598958	0.577076	0.401664	0.642741	0.726765	0.999992	1	0.918517
2003-09-15	0.727096	0.568994	0.59375	0.573713	0.399397	0.640906	0.724376	0.999992	1	0.919053
2003-09-16	0.724863	0.567892	0.585938	0.57035	0.396374	0.639071	0.723601	0.999992	1	0.919588
2003-09-17	0.723375	0.567157	0.589583	0.566987	0.391858	0.637236	0.721276	0.999992	1	0.920123
2003-09-18	0.721144	0.566055	0.590625	0.563624	0.388859	0.633566	0.719726	0.999992	1	0.920658
2003-09-19	0.718177	0.564952	0.585938	0.561955	0.383634	0.631731	0.718177	0.999992	1	0.921242
2003-09-20	0.715951	0.56385	0.585938	0.556948	0.380658	0.629896	0.716046	0.999992	1	0.915172
2003-09-21	0.713729	0.56238	0.585938	0.55361	0.376956	0.626226	0.713915	0.999992	1	0.915756
2003-09-22	0.711512	0.560175	0.579688	0.548602	0.374003	0.624391	0.711074	0.999992	1	0.922994
2003-09-23	0.709296	0.557971	0.576042	0.545276	0.37106	0.620721	0.706834	0.999992	1	0.922994
2003-09-24	0.707079	0.555766	0.576042	0.541961	0.368143	0.618886	0.702595	0.999992	1	0.924162
2003-09-25	0.705607	0.553561	0.573438	0.538646	0.365226	0.617051	0.698496	0.999992	1	0.924162
2003-09-26	0.703398	0.551357	0.573438	0.535331	0.362326	0.613382	0.69454	0.999992	1	0.927503
2003-09-27	0.701925	0.549152	0.573438	0.532017	0.358709	0.609712	0.690583	0.999992	1	0.928087
2003-09-28	0.699717	0.546947	0.572917	0.528713	0.355109	0.607877	0.687827	0.999992	1	0.929254
2003-09-29	0.69825	0.544742	0.56875	0.525422	0.351522	0.604207	0.685071	0.999992	1	0.930519
2003-09-30	0.69605	0.542905	0.565625	0.522131	0.349378	0.602372	0.682316	0.999992	1	0.931945
2003-10-01	0.694583	0.5407	0.554688	0.518839	0.345125	0.600537	0.679701	0.999992	1	0.932578
2003-10-02	0.693117	0.538716	0.55	0.515548	0.342296	0.600537	0.677158	0.999992	1	0.933211
2003-10-03	0.691653	0.536989	0.547396	0.513902	0.339484	0.598702	0.673766	0.999992	1	0.934476
2003-10-04	0.690193	0.534564	0.544792	0.510635	0.337375	0.596867	0.672141	0.999992	1	0.935108
2003-10-05	0.688001	0.532617	0.541667	0.507369	0.333181	0.595032	0.669809	0.999992	1	0.935108
2003-10-06	0.68581	0.530412	0.538542	0.504102	0.33109	0.593197	0.667478	0.999992	1	0.919488
2003-10-07	0.683625	0.52784	0.536458	0.500835	0.326234	0.589528	0.665146	0.999992	1	0.935741
2003-10-08	0.680713	0.525635	0.533854	0.497568	0.322778	0.587693	0.662131	0.999992	1	0.935741
2003-10-09	0.679258	0.52343	0.533854	0.495947	0.319357	0.587693	0.661126	0.999992	1	0.941901
2003-10-10	0.677802	0.519388	0.536458	0.494325	0.31731	0.585858	0.658111	0.999992	1	0.94959
2003-10-11	0.676352	0.517184	0.535937	0.491082	0.315262	0.584023	0.654158	0.999992	1	0.953205
2003-10-12	0.674176	0.514979	0.534896	0.487838	0.311879	0.582188	0.652282	0.999992	1	0.952509
2003-10-13	0.672	0.513142	0.530208	0.484595	0.309173	0.578518	0.651344	0.999992	1	0.953969
2003-10-14	0.669828	0.511304	0.527604	0.481352	0.306484	0.576683	0.64853	0.999992	1	0.955122
2003-10-15	0.667661	0.5091	0.525	0.478132	0.303131	0.574848	0.645716	0.999992	1	0.955698
2003-10-16	0.665494	0.507263	0.521875	0.474912	0.301128	0.573013	0.644844	0.999992	1	0.959127
2003-10-17	0.664772	0.50763	0.521354	0.474912	0.296494	0.571178	0.643102	0.999992	1	0.968289
2003-10-18	0.663327	0.507263	0.521875	0.491082	0.296494	0.571178	0.64223	0.999992	1	0.992656
2003-10-19	0.661889	0.505793	0.521354	0.509002	0.294514	0.569402	0.640488	0.999992	1	0.996586
2003-10-20	0.66045	0.504323	0.526042	0.510635	0.294514	0.569402	0.639616	0.999992	1	0.996586
2003-10-21	0.659012	0.504323	0.527604	0.510635	0.294514	0.567625	0.638745	0.999992	1	0.996586
2003-10-22	0.657573	0.503221	0.528125	0.510635	0.293202	0.565849	0.640488	0.999992	1	0.996586
2003-10-23	0.655418	0.501383	0.528125	0.507369	0.290578	0.564072	0.641359	0.999992	1	0.996586
2003-10-24	0.653984	0.499914	0.527083	0.504102	0.28861	0.562296	0.640488	0.999992	1	0.996586
2003-10-25	0.653984	0.498811	0.5375	0.507369	0.292546	0.565849	0.644844	0.999992	1	0.996586
2003-10-26	0.654701	0.499914	0.543229	0.533674	0.30179	0.571178	0.644844	0.999992	1	0.996586
2003-10-27	0.653267	0.499546	0.544271	0.535331	0.30246	0.569402	0.641359	0.999992	1	0.996586
2003-10-28	0.653267	0.499179	0.547917	0.541961	0.30179	0.573013	0.639616	0.999992	1	0.996586
2003-10-29	0.653984	0.503588	0.549479	0.541961	0.30985	0.571178	0.639616	0.999992	1	0.996586
2003-10-30	0.653267	0.503221	0.560937	0.543618	0.30985	0.571178	0.637873	0.999992	1	0.996586
2003-10-31	0.651834	0.501016	0.560937	0.543618	0.307155	0.569402	0.637002	0.999992	1	0.996586
2003-11-01	0.651117	0.501751	0.560417	0.541961	0.304472	0.569402	0.633787	0.999992	1	0.996586
2003-11-02	0.648967	0.500281	0.558333	0.541961	0.303131	0.567625	0.632984	0.999992	1	0.996586
2003-11-03	0.647539	0.498811	0.557292	0.541961	0.301128	0.565849	0.631376	0.999992	1	0.996586
2003-11-04	0.645398	0.497341	0.555729	0.540304	0.299142	0.564072	0.629769	0.999992	1	0.996586
2003-11-05	0.643257	0.495872	0.555729	0.540304	0.296494	0.562296	0.628228	0.999992	1	0.996586
2003-11-06	0.643257	0.494402	0.555729	0.540304	0.294514	0.560519	0.626754	0.999992	1	0.996586
2003-11-07	0.643971	0.493667	0.56875	0.546933	0.30246	0.567625	0.634591	0.999992	1	0.996586
2003-11-08	0.643257	0.493667	0.571875	0.563624	0.311203	0.571178	0.631376	0.999992	1	0.996586
2003-11-09	0.643257	0.495137	0.572917	0.573713	0.312556	0.573013	0.629769	0.999992	1	0.996586
2003-11-10	0.644684	0.496239	0.577083	0.582132	0.313909	0.576683	0.631376	0.999992	1	0.996586
2003-11-11	0.663327	0.498811	0.639792	0.588905	0.335969	0.591362	0.636198	0.999992	1	0.996586
2003-11-12	0.674901	0.549152	0.641667	0.599075	0.363773	0.596867	0.641359	0.999992	1	0.996586
2003-11-13	0.677077	0.554296	0.681042	0.614419	0.37106	0.596867	0.640488	0.999992	1	0.996586
2003-11-14	0.679258	0.555399	0.682917	0.617854	0.373265	0.596867	0.640488	0.999992	1	0.996586
2003-11-15	0.677077	0.555031	0.683542	0.617854	0.374742	0.596867	0.641359	0.999992	1	0.996586
2003-11-16	0.675627	0.555031	0.684167	0.617854	0.373265	0.595032	0.639616	0.999992	1	0.996586
2003-11-17	0.674901	0.554296	0.684167	0.617854	0.373265	0.593197	0.638745	0.999992	1	0.996586
2003-11-18	0.673451	0.553561	0.681042	0.616136	0.372527	0.591362	0.637873	0.999992	1	0.996586
2003-11-19	0.673451	0.555031	0.685417	0.617854	0.373265	0.591362	0.637873	0.999992	1	0.996586
2003-11-20	0.672	0.554296	0.687292	0.616136	0.372527	0.589528	0.637002	0.999992	1	0.996586
2003-11-21	0.669828	0.553194	0.681667	0.612714	0.371789	0.589528	0.636198	0.999992	1	0.996586
2003-11-22	0.668383	0.552459	0.682292	0.609305	0.370331	0.589528	0.635395	0.999992	1	0.996586
2003-11-23	0.666939	0.551357	0.683542	0.6076	0.368872	0.587693	0.636198	0.999992	1	0.996586
2003-11-24	0.664772	0.549152	0.682917	0.60419	0.367414	0.585858	0.634591	0.999992	1	0.996586
2003-11-25	0.663327	0.547682	0.682917	0.602485	0.363773	0.584023	0.632984	0.999992	1	0.996586
2003-11-26	0.662608	0.546212	0.682917	0.60078	0.362326	0.582188	0.63218	0.999992	1	0.996586
2003-11-27	0.661169	0.544375	0.682917	0.599075	0.360879	0.582188	0.63218	0.999992	1	0.996586
2003-11-28	0.659731	0.544008	0.682292	0.593984	0.360879	0.580353	0.631376	0.999992	1	0.996586
2003-11-29	0.658292	0.542538	0.685417	0.592291	0.357262	0.578518	0.630573	0.999992	1	0.996586
2003-11-30	0.656854	0.541068	0.674167	0.590598	0.355827	0.578518	0.629769	0.999992	1	0.996586
2003-12-01	0.654701	0.540039	0.674167	0.588905	0.352957	0.576683	0.628965	0.999992	1	0.996586
2003-12-02	0.653267	0.538386	0.674167	0.585518	0.351522	0.576683	0.628965	0.999992	1	0.996586
2003-12-03	0.652551	0.536989	0.674792	0.585518	0.350086	0.574848	0.628228	0.999992	1	0.996586
2003-12-04	0.656854	0.5407	0.675417	0.585518	0.350086	0.574848	0.628965	0.999992	1	0.996586
2003-12-05	0.659731	0.54037	0.676042	0.582132	0.351522	0.573013	0.627491	0.999992	1	0.996586
2003-12-06	0.66045	0.54037	0.676042	0.580439	0.350804	0.571178	0.626754	0.999992	1	0.996586
2003-12-07	0.66045	0.539708	0.676667	0.577076	0.350804	0.569402	0.626754	0.999992	1	0.996586
2003-12-08	0.664772	0.541803	0.692917	0.577076	0.359432	0.569402	0.628228	0.999992	1	0.996586
2003-12-09	0.669105	0.554296	0.696667	0.573713	0.365226	0.567625	0.627491	0.999992	1	0.996586
2003-12-10	0.67055	0.555399	0.698542	0.57035	0.366684	0.565849	0.624543	0.999992	1	0.996586
2003-12-11	0.669828	0.555399	0.699167	0.566987	0.367414	0.564072	0.626017	0.999992	1	0.996586
2003-12-12	0.669828	0.555031	0.699167	0.565306	0.366684	0.564072	0.62528	0.999992	1	0.996586
2003-12-13	0.669105	0.554664	0.699792	0.561955	0.365955	0.564072	0.623069	0.999992	1	0.996586
2003-12-14	0.667661	0.554664	0.702292	0.561955	0.365955	0.565849	0.623069	0.999992	1	0.996586
2003-12-15	0.666216	0.554296	0.702292	0.561955	0.365226	0.565849	0.621595	0.999992	1	0.996586
2003-12-16	0.669105	0.555766	0.713542	0.563624	0.37917	0.574848	0.628965	0.999992	1	0.996586
2003-12-17	0.683625	0.573771	0.752292	0.595677	0.411619	0.598702	0.636198	0.999992	1	0.996586
2003-12-18	0.721886	0.6186	0.804063	0.599075	0.417787	0.624391	0.637002	0.999992	1	0.996586
2003-12-19	0.729329	0.628888	0.813542	0.60078	0.427912	0.624391	0.637002	0.999992	1	0.996586
2003-12-20	0.732319	0.634154	0.818646	0.602485	0.430267	0.624391	0.637002	0.999992	1	0.996586
2003-12-21	0.732319	0.638943	0.821562	0.602485	0.431052	0.624391	0.637002	0.999992	1	0.996586
2003-12-22	0.732319	0.642136	0.822292	0.602485	0.431052	0.624391	0.637002	0.999992	1	0.996586
2003-12-23	0.733066	0.644796	0.818646	0.602485	0.431837	0.622556	0.637002	0.999992	1	0.996586
2003-12-24	0.733066	0.646925	0.818646	0.602485	0.431052	0.622556	0.637002	0.999992	1	0.996586
2003-12-25	0.733066	0.646925	0.827396	0.602485	0.431052	0.622556	0.637873	0.999992	1	0.996586
2003-12-26	0.736803	0.647457	0.835417	0.61101	0.433409	0.626226	0.645716	0.999992	1	0.996586
2003-12-27	0.749572	0.66608	0.882917	0.628157	0.468573	0.635401	0.65322	0.999992	1	0.996586
2003-12-28	0.754852	0.672997	0.889583	0.629874	0.480801	0.637236	0.656101	0.999992	1	0.996586
2003-12-29	0.756363	0.674593	0.89375	0.631591	0.487362	0.637236	0.658111	0.999992	1	0.996586
2003-12-30	0.756363	0.675126	0.89375	0.631591	0.490654	0.637236	0.659116	0.999992	1	0.996586
2003-12-31	0.757873	0.675658	0.894583	0.631591	0.492306	0.637236	0.659116	0.999992	1	0.996586
2004-01-01	0.757873	0.675126	0.894583	0.631591	0.493132	0.639071	0.659116	0.999992	1	0.996586
2004-01-02	0.757873	0.674593	0.895417	0.631591	0.493958	0.639071	0.660121	0.999992	1	0.996586
2004-01-03	0.757118	0.674593	0.897083	0.629874	0.493958	0.639071	0.660121	0.999992	1	0.996586
2004-01-04	0.757873	0.675658	0.912917	0.631591	0.493958	0.640906	0.663136	0.999992	1	0.996586
2004-01-05	0.770773	0.700666	0.939583	0.643696	0.527487	0.65008	0.673766	0.999992	1	0.996586
2004-01-06	0.782983	0.720886	0.973958	0.66804	0.558369	0.672096	0.683234	0.999992	1	0.996586
2004-01-07	0.789118	0.730463	0.965625	0.676804	0.573183	0.672096	0.687827	0.999992	1	0.996586
2004-01-08	0.792963	0.736848	0.955208	0.68031	0.579346	0.672096	0.689664	0.999992	1	0.996586
2004-01-09	0.795271	0.741105	0.963542	0.68031	0.58199	0.672096	0.691572	0.999992	1	0.996586
2004-01-10	0.79604	0.74483	0.963542	0.68031	0.583757	0.67393	0.691572	0.999992	1	0.996586
2004-01-11	0.79681	0.746958	0.964583	0.68031	0.582872	0.67393	0.69454	0.999992	1	0.996586
2004-01-12	0.802211	0.752811	0.989583	0.682063	0.58641	0.675765	0.699486	0.999992	1	0.996586
2004-01-13	0.802211	0.767178	0.965625	0.683816	0.591717	0.679433	0.707894	0.999992	1	0.996586
2004-01-14	0.804527	0.779948	0.95625	0.685581	0.593498	0.683102	0.704714	0.999992	1	0.996586
2004-01-15	0.805299	0.787929	0.963542	0.685581	0.594388	0.684937	0.706834	0.999992	1	0.996586
2004-01-16	0.804527	0.79325	0.976042	0.687345	0.594388	0.686772	0.708954	0.999992	1	0.996586
2004-01-17	0.804527	0.814002	0.963542	0.68911	0.593498	0.688607	0.708954	0.999992	1	0.996586
2004-01-18	0.804527	0.816662	0.966667	0.68911	0.592608	0.690442	0.708954	0.999992	1	0.996586
2004-01-19	0.803755	0.816662	0.96875	0.68911	0.589948	0.690442	0.708954	0.999992	1	0.996586
2004-01-20	0.805299	0.824111	0.964583	0.68911	0.585526	0.690442	0.708954	0.999992	1	0.996586
2004-01-21	0.813048	0.825708	0.95	0.68911	0.585526	0.690442	0.711074	0.999992	1	0.996586
2004-01-22	0.919859	0.864019	0.95625	0.787829	0.705867	0.809149	0.775694	0.999992	1	0.996586
2004-01-23	0.941259	0.890092	0.90625	0.820926	0.752248	0.824178	0.769433	0.999992	1	0.996586
2004-01-24	0.953716	0.916996	0.815	0.835758	0.77391	0.829814	0.773607	0.999992	0.985189	0.996586
2004-01-25	0.960386	0.925211	0.815	0.841339	0.782854	0.831693	0.78083	0.999992	0.988429	0.996586
2004-01-26	0.965401	0.93266	0.822292	0.856279	0.790827	0.826057	0.788851	0.999992	1	0.996586
2004-01-27	0.973788	0.941706	0.851458	0.856279	0.79283	0.805391	0.788851	0.999992	0.985189	0.996586
2004-01-28	0.983052	0.948623	0.882917	0.856279	0.795835	0.788479	0.801249	0.999992	0.985189	0.996586
2004-01-29	1	0.964587	0.870417	0.907243	0.852784	0.852357	0.828815	0.999992	0.985189	0.996586
2004-01-30	1	1	0.935417	0.945561	0.890267	0.903084	0.835141	0.999992	1	0.969427
2004-01-31	1	1	0.874583	0.926343	0.922016	0.919992	0.89044	0.999992	1	0.996586
2004-02-01	1	1	0.872083	0.905335	0.930557	0.912478	0.896368	0.999992	1	0.743164
2004-02-02	1	1	0.874583	0.905335	0.933764	0.906842	0.898739	0.999992	1	0.996586
2004-02-03	1	1	0.86875	0.907243	0.933764	0.897447	0.901761	0.999992	1	0.996586
2004-02-04	1	1	0.915417	0.912966	0.934833	0.891809	0.905434	0.999992	0.985189	0.996586
2004-02-05	1	1	0.91625	0.916781	0.932695	0.882414	0.907271	0.999992	0.985189	0.996586
2004-02-06	1	1	0.91375	0.920597	0.929488	0.884293	0.907271	0.999992	1	0.996586
2004-02-07	1	1	0.914583	0.922504	0.928419	0.886171	0.909107	0.999992	1	0.996586
2004-02-08	1	1	0.91625	0.922504	0.926281	0.88805	0.910109	0.999992	1	0.996586
2004-02-09	1	1	0.917917	0.922504	0.924143	0.88993	0.911111	0.999992	1	0.996586
2004-02-10	1	1	0.91625	0.924424	0.920953	0.891809	0.911111	0.999992	1	0.996586
2004-02-11	1	1	0.917917	0.924424	0.915637	0.893688	0.911111	0.999992	1	0.996586
2004-02-12	1	1	0.91875	0.924424	0.90821	0.893688	0.912112	0.999992	1	0.996586
2004-02-13	1	1	0.877083	0.924424	0.9008	0.901205	0.919125	0.999992	0.908945	0.996586
2004-02-14	1	1	0.87125	0.926343	0.903969	0.904964	0.92021	0.924806	0.909854	0.996586
2004-02-15	1	1	0.880417	0.932101	0.899745	0.904964	0.924551	0.875819	0.860441	0.996586
2004-02-16	1	1	0.887083	0.930182	0.893419	0.904964	0.929977	0.875819	0.864905	0.996586
2004-02-17	1	1	0.889583	0.930182	0.88817	0.904964	0.932314	0.838766	0.82634	0.996586
2004-02-18	1	1	0.895417	0.930182	0.886073	0.906842	0.929977	0.811313	0.79943	0.996586
2004-02-19	1	1	0.902083	0.930182	0.883976	0.910599	0.925636	0.811313	0.770419	0.996586
2004-02-20	1	1	0.920417	0.930182	0.882928	0.914356	0.923465	0.757174	0.737868	0.996586
2004-02-21	1	1	0.960417	0.930182	0.892364	0.927506	0.928891	0.723897	0.702245	0.996586
2004-02-22	1	1	0.971875	0.937859	0.896582	0.929385	0.932314	0.723897	0.704311	0.996586
2004-02-23	1	1	0.986458	0.939778	0.898691	0.931264	0.933483	0.691391	0.648231	0.996586
2004-02-24	1	1	0.9875	0.941698	0.9008	0.938778	0.934651	0.683109	0.632977	0.996586
2004-02-25	1	1	1	0.94363	0.90821	0.946366	0.940495	0.665596	0.633787	0.996586
2004-02-26	1	1	1	0.949425	0.914574	0.954028	0.942916	0.639801	0.630614	0.996586
2004-02-27	1	1	0.997917	0.949425	0.914574	0.955944	0.947924	0.632525	0.623932	0.996586
2004-02-28	1	1	0.991667	0.961015	0.91989	0.971268	0.955155	0.632525	0.623932	0.996586
2004-02-29	1	1	0.996875	0.974614	0.928419	0.988507	0.961945	0.632525	0.625417	0.996586
2004-03-01	1	1	1	0.9785	0.929488	0.994254	0.962915	0.636163	0.627644	0.996586
2004-03-02	1	1	1	0.980443	0.928419	0.998085	0.962915	0.637618	0.629129	0.996586
2004-03-03	1	1	1	0.980443	0.926281	0.998085	0.968118	0.642182	0.633787	0.996586
2004-03-04	1	1	1	0.980443	0.926281	0.998085	0.973409	0.649457	0.641211	0.996586
2004-03-05	1	1	1	0.982398	0.959611	0.994254	1	0.656336	0.648231	0.996586
2004-03-06	1	1	0.989583	0.976557	0.989017	0.975099	1	0.656336	0.648231	0.996586
2004-03-07	1	1	1	0.990221	0.997803	0.952113	1	0.665596	0.657681	0.996586
2004-03-08	1	1	1	0.992177	1	0.944451	1	0.669564	0.661731	0.996586
2004-03-09	1	1	1	0.994133	1	0.944451	1	0.67254	0.664769	0.996586
2004-03-10	1	1	1	0.994133	1	0.965521	1	0.700363	0.692602	0.996586
2004-03-11	1	1	1	0.994133	1	0.969352	1	0.73676	0.730561	0.996586
2004-03-12	1	1	0.958333	0.984354	1	0.973183	1	0.756214	0.751919	0.996586
2004-03-13	1	1	0.989583	0.98631	1	0.977014	1	0.775156	0.772998	0.996586
2004-03-14	1	1	1	0.992177	1	0.982761	1	0.780852	0.779373	0.996586
2004-03-15	1	1	0.989583	0.996089	1	0.986592	1	0.792179	0.792052	0.996586
2004-03-16	1	1	1	1	1	0.988507	1	0.79973	0.800505	0.996586
2004-03-17	1	1	1	1	1	0.992338	1	0.807441	0.808818	0.996586
2004-03-18	1	1	1	1	1	0.994254	1	0.814692	0.816338	0.996586
2004-03-19	1	1	1	1	1	0.996169	1	0.822505	0.824442	0.996586
2004-03-20	1	1	1	1	1	0.980845	1	0.827996	0.830137	0.996586
2004-03-21	1	1	1	1	1	0.980845	1	0.833839	0.836197	0.996586
2004-03-22	0.999151	1	1	1	1	0.980845	1	0.838766	0.841307	0.996586
2004-03-23	0.997452	1	1	1	1	0.982761	1	0.841934	0.844593	0.996586
2004-03-24	0.996603	1	1	1	1	0.982761	1	0.848269	0.851164	0.996586
2004-03-25	0.994055	1	1	1	1	0.980845	1	0.856611	0.859623	0.996586
2004-03-26	0.993206	1	1	1	1	0.980845	1	0.856611	0.859623	0.996586
2004-03-27	0.992356	0.999941	1	0.998044	1	0.980845	1	0.86007	0.863119	0.996586
2004-03-28	0.992356	0.999824	1	0.994133	1	0.982761	1	0.866252	0.869368	0.996586
2004-03-29	0.992356	0.999912	1	0.996089	1	0.986592	1	0.871035	0.874203	0.996586
2004-03-30	0.993206	0.999853	1	1	1	0.992338	1	0.875819	0.879038	0.996586
2004-03-31	0.993206	0.999765	1	1	1	0.994254	1	0.88097	0.884245	0.996586
2004-04-01	0.991507	0.99811	1	1	1	0.994254	1	0.886122	0.889452	0.996586
2004-04-02	0.991507	0.997046	1	0.998044	1	0.996169	1	0.891641	0.895031	0.996586
2004-04-03	0.990662	0.994917	1	0.998044	1	0.996169	1	0.897161	0.90061	0.996586
2004-04-04	0.989816	0.993321	1	0.994133	1	0.996169	1	0.898006	0.901444	0.996586
2004-04-05	0.988971	0.991192	1	0.990221	1	0.996169	1	0.901385	0.904778	0.996586
2004-04-06	0.98728	0.986935	1	0.990221	1	0.994254	1	0.905608	0.908945	0.996586
2004-04-07	0.986434	0.986935	1	0.98631	1	0.994254	1	0.905608	0.908945	0.996586
2004-04-08	0.985589	0.985871	0.997917	0.98631	1	0.992338	1	0.91298	0.916218	0.996586
2004-04-09	0.984743	0.98321	0.997917	0.98631	0.994508	0.992338	1	0.915822	0.919021	0.996586
2004-04-10	0.983052	0.977889	0.996875	0.984354	0.985739	0.992338	1	0.917818	0.920991	0.996586
2004-04-11	0.981367	0.976825	0.995833	0.980443	0.979185	0.992338	1	0.919815	0.922961	0.996586
2004-04-12	0.979682	0.975761	0.991667	0.980443	0.972644	0.992338	1	0.92281	0.925916	0.996586
2004-04-13	0.97884	0.973633	0.991667	0.9785	0.965029	0.992338	1	0.924806	0.927886	0.996586
2004-04-14	0.977155	0.972036	0.990625	0.976557	0.957444	0.990423	1	0.928032	0.931068	0.996586
2004-04-15	0.97547	0.969908	0.989583	0.974614	0.949893	0.990423	1	0.936709	0.939629	0.996586
2004-04-16	0.97547	0.968844	0.99375	0.974614	0.944507	0.990423	0.998593	0.944772	0.947585	0.996586
2004-04-17	0.973788	0.966183	0.995833	0.974614	0.936983	0.990423	0.998593	0.947076	0.949858	0.996586
2004-04-18	0.972949	0.964055	0.995833	0.972672	0.932695	0.990423	0.995779	0.951556	0.9541	0.996586
2004-04-19	0.971271	0.961927	0.994792	0.972672	0.928419	0.988507	0.995779	0.956036	0.958343	0.996586
2004-04-20	0.970432	0.959798	0.992708	0.970729	0.922016	0.988507	0.992965	0.960924	0.962972	0.996586
2004-04-21	0.969593	0.957138	0.992708	0.970729	0.915637	0.988507	0.992965	0.963856	0.965749	0.996586
2004-04-22	0.967914	0.955009	0.992708	0.968786	0.90821	0.988507	0.992965	0.96687	0.968603	0.996586
2004-04-23	0.966236	0.952348	0.992708	0.966843	0.902908	0.986592	0.988745	0.971106	0.972615	0.996586
2004-04-24	0.964565	0.95022	0.986458	0.966843	0.894473	0.986592	0.987338	0.974282	0.975623	0.996586
2004-04-25	0.962893	0.948091	0.988542	0.9649	0.88817	0.986592	0.985931	0.978681	0.979789	0.996586
2004-04-26	0.961222	0.945431	0.98125	0.962958	0.880836	0.984676	0.983638	0.980962	0.981949	0.996586
2004-04-27	0.960386	0.94277	0.98125	0.961015	0.87458	0.984676	0.983638	0.984383	0.985189	0.996586
2004-04-28	0.959551	0.940642	0.984375	0.959083	0.871452	0.984676	0.983638	0.987804	0.988429	0.996586
2004-04-29	0.958715	0.939046	0.979167	0.959083	0.863134	0.982761	0.980199	0.987804	0.988429	0.996586
2004-04-30	0.957047	0.935853	0.978125	0.957151	0.857953	0.980845	0.977906	0.992679	0.993057	0.996586
2004-05-01	0.956214	0.933725	0.978125	0.957151	0.849688	0.97893	0.975613	0.992679	0.993057	0.996586
2004-05-02	0.954548	0.931064	0.975	0.95522	0.84352	0.97893	0.975613	0.992679	0.993057	0.996586
2004-05-03	0.952883	0.928404	0.975	0.957151	0.836347	0.977014	0.973409	0.996335	0.996529	0.996586
2004-05-04	0.950385	0.924632	0.973958	0.951356	0.833281	0.977014	0.969176	0.997554	0.997686	0.996586
2004-05-05	0.950385	0.921739	0.973958	0.949425	0.831236	0.975099	0.96706	0.997554	0.997686	0.996586
2004-05-06	0.950385	0.920003	0.971875	0.947493	0.830214	0.973183	0.970234	0.999992	1	0.996586
2004-05-07	0.949552	0.916996	0.970833	0.947493	0.829195	0.973183	0.969176	0.999992	1	0.996586
2004-05-08	0.947893	0.914568	0.969792	0.94363	0.826137	0.973183	0.96706	0.999992	1	0.996586
2004-05-09	0.947064	0.910312	0.965625	0.939778	0.82206	0.973183	0.963885	0.999992	1	0.996586
2004-05-10	0.943747	0.907119	0.965625	0.93402	0.820022	0.971268	0.964943	0.999992	1	0.996586
2004-05-11	0.945405	0.903927	0.955208	0.930182	0.818001	0.971268	0.961945	0.999992	1	0.996586
2004-05-12	0.942917	0.901266	0.954167	0.928262	0.81598	0.971268	0.960005	0.999992	1	0.996586
2004-05-13	0.941259	0.897541	0.954167	0.924424	0.812948	0.969352	0.958065	0.999992	1	0.996586
2004-05-14	0.937957	0.897009	0.953125	0.922504	0.80891	0.969352	0.956125	0.999992	1	0.996586
2004-05-15	0.936306	0.896477	0.948958	0.920597	0.806895	0.967437	0.954185	0.999992	1	0.996586
2004-05-16	0.934655	0.893285	0.948958	0.916781	0.803872	0.965521	0.950429	0.999992	1	0.996586
2004-05-17	0.932181	0.890092	0.948958	0.912966	0.800849	0.963606	0.947924	0.999992	1	0.996586
2004-05-18	0.930535	0.888496	0.947917	0.909151	0.797839	0.96169	0.94542	0.999992	1	0.996586
2004-05-19	0.928889	0.885303	0.947917	0.905335	0.793832	0.959775	0.941664	0.999992	1	0.996586
2004-05-20	0.927243	0.883175	0.940417	0.901532	0.791828	0.957859	0.939326	0.999992	1	0.996586
2004-05-21	0.924774	0.880514	0.939583	0.897742	0.788829	0.955944	0.93582	0.999992	1	0.996586
2004-05-22	0.922317	0.878386	0.93875	0.893951	0.785842	0.954028	0.933483	0.999992	1	0.996586
2004-05-23	0.919859	0.874661	0.932917	0.89016	0.782854	0.952113	0.931145	0.999992	1	0.996586
2004-05-24	0.918221	0.872	0.932917	0.88637	0.779867	0.950197	0.927806	0.999992	1	0.996586
2004-05-25	0.916583	0.870404	0.932917	0.882591	0.775895	0.948282	0.925636	0.999992	1	0.996586
2004-05-26	0.915767	0.867744	0.932917	0.882591	0.771924	0.946366	0.923465	0.999992	1	0.996586
2004-05-27	0.913318	0.864551	0.927917	0.878823	0.769938	0.944451	0.921295	0.999992	1	0.996586
2004-05-28	0.91087	0.86189	0.927083	0.875056	0.766986	0.942535	0.918123	0.999992	1	0.996586
2004-05-29	0.908421	0.85923	0.92625	0.871289	0.765018	0.940656	0.914116	0.999992	1	0.996586
2004-05-30	0.905983	0.856569	0.925417	0.865638	0.762065	0.938778	0.915118	0.999992	1	0.996586
2004-05-31	0.904357	0.853909	0.922917	0.863766	0.757154	0.936899	0.912112	0.999992	1	0.996586
2004-06-01	0.904357	0.853909	0.92375	0.865638	0.756173	0.936899	0.909107	0.999992	1	0.996586
2004-06-02	0.903545	0.852312	0.93125	0.863766	0.75421	0.936899	0.908189	0.999992	1	0.996586
2004-06-03	0.901106	0.848588	0.92875	0.860022	0.752248	0.935021	0.906352	0.999992	1	0.996586
2004-06-04	0.899569	0.846991	0.922917	0.858151	0.74931	0.933142	0.903598	0.999992	1	0.996586
2004-06-05	0.89812	0.843799	0.922917	0.854407	0.74736	0.931264	0.901761	0.999992	1	0.996586
2004-06-06	0.896672	0.841671	0.922083	0.854407	0.746384	0.931264	0.900843	0.999992	1	0.996586
2004-06-07	0.894498	0.839542	0.920417	0.852535	0.745409	0.929385	0.896368	0.999992	1	0.996586
2004-06-08	0.892159	0.836882	0.912083	0.848791	0.734716	0.929385	0.893997	0.999992	1	0.996586
2004-06-09	0.889486	0.835285	0.912083	0.846919	0.725056	0.929385	0.889254	0.999992	1	0.996586
2004-06-10	0.887704	0.832625	0.912083	0.845059	0.723129	0.927506	0.884749	0.999992	1	0.996586
2004-06-11	0.885031	0.830497	0.910417	0.841339	0.71832	0.925628	0.882536	0.999992	1	0.996586
2004-06-12	0.882534	0.827304	0.902083	0.837618	0.714477	0.923749	0.880322	0.999992	1	0.996586
2004-06-13	0.880125	0.824644	0.899583	0.833898	0.712556	0.923749	0.877003	0.999992	1	0.996586
2004-06-14	0.877716	0.821983	0.899583	0.832038	0.707776	0.921871	0.875975	0.999992	1	0.996586
2004-06-15	0.874511	0.819323	0.89875	0.828317	0.707776	0.919992	0.87392	0.999992	1	0.996586
2004-06-16	0.872912	0.815598	0.89125	0.824621	0.703002	0.918114	0.86981	0.999992	1	0.996586
2004-06-17	0.871313	0.811873	0.89125	0.820926	0.695405	0.916235	0.865779	0.999992	1	0.996586
2004-06-18	0.868914	0.808681	0.890417	0.81723	0.690672	0.914356	0.863882	0.999992	1	0.996586
2004-06-19	0.866522	0.805488	0.890417	0.813534	0.686899	0.912478	0.861036	0.999992	1	0.996586
2004-06-20	0.86493	0.80336	0.895417	0.809838	0.685013	0.910599	0.858191	0.999992	1	0.996586
2004-06-21	0.861745	0.800167	0.895417	0.806166	0.680315	0.906842	0.855503	0.999992	1	0.996586
2004-06-22	0.860153	0.797507	0.89625	0.802494	0.677503	0.904964	0.852895	0.999992	1	0.996586
2004-06-23	0.858567	0.794846	0.89625	0.808002	0.663512	0.903084	0.852026	0.999992	1	0.996586
2004-06-24	0.857774	0.79325	0.900417	0.837618	0.676566	0.908721	0.857242	0.999992	1	0.996586
2004-06-25	0.856189	0.79059	0.90125	0.843199	0.675629	0.916235	0.855503	0.999992	1	0.996586
2004-06-26	0.853018	0.787929	0.90125	0.841339	0.673755	0.914356	0.853765	0.999992	1	0.996586
2004-06-27	0.851435	0.784737	0.90125	0.837618	0.671892	0.910599	0.852895	0.999992	1	0.996586
2004-06-28	0.848276	0.781544	0.900417	0.835758	0.666303	0.910599	0.849417	0.999992	1	0.996586
2004-06-29	0.845906	0.778351	0.892083	0.833898	0.659798	0.908721	0.848548	0.999992	1	0.996586
2004-06-30	0.842754	0.775691	0.89125	0.832038	0.654234	0.906842	0.842899	0.999992	1	0.996586
2004-07-01	0.840395	0.772499	0.89125	0.828317	0.64593	0.904964	0.83951	0.999992	1	0.996586
2004-07-02	0.838035	0.769306	0.890417	0.826469	0.639513	0.903084	0.836196	0.999992	1	0.996586
2004-07-03	0.835679	0.766645	0.882083	0.822774	0.630387	0.901205	0.831978	0.999992	1	0.996586
2004-07-04	0.83333	0.763453	0.882083	0.819078	0.62493	0.897447	0.828815	0.999992	1	0.996586
2004-07-05	0.830198	0.760792	0.880417	0.815382	0.618575	0.895567	0.82776	0.999992	1	0.996586
2004-07-06	0.827852	0.757068	0.86625	0.811686	0.61318	0.891809	0.825727	0.999992	1	0.996586
2004-07-07	0.82473	0.753875	0.86625	0.808002	0.609583	0.88805	0.82181	0.999992	1	0.996586
2004-07-08	0.822388	0.750683	0.865417	0.806166	0.605102	0.884293	0.818873	0.999992	1	0.996586
2004-07-09	0.82005	0.746958	0.864583	0.802494	0.602413	0.882414	0.816011	0.999992	1	0.996586
2004-07-10	0.817716	0.742701	0.85875	0.798822	0.59795	0.878657	0.814203	0.999992	1	0.996586
2004-07-11	0.815382	0.739509	0.85875	0.793313	0.594388	0.876778	0.814203	0.999992	1	0.996586
2004-07-12	0.813048	0.736316	0.857292	0.787829	0.591717	0.8749	0.808781	0.999992	1	0.996586
2004-07-13	0.809949	0.732592	0.847083	0.782358	0.588179	0.871143	0.807877	0.999992	1	0.996586
2004-07-14	0.808399	0.729931	0.85875	0.77871	0.583757	0.869264	0.80622	0.999992	1	0.996586
2004-07-15	0.806074	0.727271	0.85875	0.775062	0.578464	0.865507	0.802077	0.999992	1	0.996586
2004-07-16	0.802983	0.724078	0.858021	0.769613	0.575819	0.86175	0.798518	0.999992	1	0.996586
2004-07-17	0.800667	0.722482	0.856563	0.765988	0.572311	0.859871	0.79637	0.999992	1	0.996586
2004-07-18	0.799123	0.719821	0.855104	0.764175	0.569692	0.857993	0.792073	0.999992	1	0.996586
2004-07-19	0.79681	0.716629	0.849271	0.758737	0.567074	0.856114	0.788851	0.999992	1	0.996586
2004-07-20	0.793732	0.713436	0.845625	0.755111	0.564458	0.852357	0.786846	0.999992	1	0.996586
2004-07-21	0.791424	0.710776	0.841979	0.75151	0.559239	0.850478	0.783838	0.999992	1	0.996586
2004-07-22	0.789118	0.706519	0.84125	0.74791	0.553173	0.846721	0.779828	0.999992	1	0.996586
2004-07-23	0.786051	0.700666	0.840521	0.744309	0.548853	0.842964	0.776738	0.999992	1	0.996586
2004-07-24	0.784517	0.698538	0.835417	0.738908	0.546273	0.841086	0.773607	0.999992	1	0.996586
2004-07-25	0.781452	0.695345	0.831042	0.735319	0.54284	0.837328	0.768389	0.999992	1	0.996586
2004-07-26	0.778397	0.69162	0.827396	0.731743	0.539408	0.83545	0.767642	0.999992	1	0.996586
2004-07-27	0.776105	0.687896	0.824479	0.728167	0.535146	0.831693	0.765403	0.999992	1	0.996586
2004-07-28	0.773816	0.684703	0.819375	0.724591	0.532589	0.829814	0.763163	0.999992	1	0.996586
2004-07-29	0.771533	0.680979	0.818646	0.721014	0.529186	0.826057	0.760135	0.999992	1	0.996586
2004-07-30	0.76849	0.678318	0.817917	0.71745	0.526638	0.824178	0.757772	0.999992	1	0.996586
2004-07-31	0.765451	0.675126	0.817187	0.713897	0.521548	0.8223	0.756197	0.999992	1	0.996586
2004-08-01	0.763176	0.671401	0.816458	0.708568	0.51733	0.820421	0.754621	0.999992	1	0.996586
2004-08-02	0.760142	0.66874	0.813542	0.705015	0.513118	0.820421	0.753046	0.999992	1	0.996586
2004-08-03	0.757873	0.66608	0.812813	0.701463	0.50893	0.816664	0.749171	0.999992	1	0.996586
2004-08-04	0.754852	0.662887	0.812083	0.697933	0.506417	0.814786	0.746266	0.999992	1	0.996586
2004-08-05	0.752585	0.659163	0.809896	0.694404	0.50142	0.811028	0.742456	0.999992	1	0.996586
2004-08-06	0.749572	0.65597	0.804792	0.690875	0.498093	0.809149	0.740648	0.999992	1	0.996586
2004-08-07	0.747313	0.65331	0.804063	0.687345	0.493958	0.80727	0.737936	0.999992	1	0.996586
2004-08-08	0.744302	0.650649	0.801875	0.682063	0.489828	0.805391	0.736128	0.999992	1	0.996586
2004-08-09	0.742052	0.646925	0.798958	0.676804	0.487362	0.803511	0.73432	0.999992	1	0.996586
2004-08-10	0.739052	0.6432	0.7975	0.673298	0.484902	0.799753	0.730962	0.999992	1	0.996586
2004-08-11	0.738303	0.64054	0.798958	0.671545	0.479984	0.797874	0.730122	0.999992	1	0.996586
2004-08-12	0.737553	0.638943	0.807708	0.669792	0.482441	0.795994	0.726765	0.999992	1	0.996586
2004-08-13	0.734561	0.637347	0.80625	0.666287	0.479167	0.792236	0.724376	0.999992	1	0.996586
2004-08-14	0.732319	0.633622	0.804063	0.662806	0.476716	0.788479	0.722051	0.999992	1	0.996586
2004-08-15	0.730077	0.63109	0.803333	0.659326	0.475081	0.7866	0.718177	0.999992	1	0.996586
2004-08-16	0.729329	0.632191	0.803333	0.655845	0.471819	0.784722	0.718177	0.999992	1	0.996586
2004-08-17	0.731571	0.630356	0.820104	0.654105	0.474264	0.784722	0.716046	0.999992	1	0.996586
2004-08-18	0.730077	0.628521	0.816458	0.657585	0.485722	0.790357	0.719726	0.999992	1	0.996586
2004-08-19	0.727841	0.627051	0.815	0.647155	0.484082	0.788479	0.718177	0.957991	0.960195	0.996586
2004-08-20	0.726352	0.625214	0.815	0.643696	0.482441	0.784722	0.717466	0.935557	0.938493	0.996586
2004-08-21	0.724863	0.622642	0.812083	0.640238	0.480801	0.782843	0.716756	0.914823	0.918036	0.996586
2004-08-22	0.723375	0.620805	0.812083	0.636779	0.47835	0.779086	0.716046	0.914823	0.918036	0.996586
2004-08-23	0.721886	0.6186	0.809896	0.629874	0.477533	0.777207	0.716046	0.875819	0.879038	0.996586
2004-08-24	0.718177	0.616395	0.805521	0.62644	0.473447	0.775329	0.716046	0.859187	0.862227	0.996586
2004-08-25	0.71521	0.613823	0.804792	0.623005	0.468573	0.77345	0.713915	0.839822	0.842403	0.996586
2004-08-26	0.712251	0.611986	0.804063	0.617854	0.466951	0.771572	0.712494	0.818915	0.820719	0.996586
2004-08-27	0.709296	0.609414	0.802604	0.612714	0.464517	0.771572	0.711784	0.785011	0.784029	0.996586
2004-08-28	0.706343	0.607209	0.798229	0.609305	0.462101	0.765936	0.714625	0.784179	0.783098	0.996586
2004-08-29	0.704134	0.605739	0.798958	0.605895	0.459684	0.764057	0.711074	0.770549	0.76784	0.996586
2004-08-30	0.703398	0.604269	0.798958	0.602485	0.457268	0.762179	0.708954	0.753334	0.748757	0.996586
2004-08-31	0.701189	0.602065	0.793854	0.597371	0.455663	0.7603	0.706834	0.735096	0.728735	0.996586
2004-09-01	0.698983	0.59986	0.791667	0.592291	0.451665	0.758422	0.704714	0.720377	0.712576	0.996586
2004-09-02	0.697517	0.59839	0.791042	0.588905	0.449266	0.756543	0.702595	0.710025	0.702245	0.996586
2004-09-03	0.69605	0.597288	0.784167	0.585518	0.44767	0.754665	0.700475	0.675517	0.667806	0.996586
2004-09-04	0.692384	0.594716	0.783542	0.582132	0.443687	0.75283	0.697507	0.627781	0.619979	0.996586
2004-09-05	0.689462	0.592144	0.781042	0.578758	0.4405	0.750995	0.695529	0.627781	0.619979	0.996586
2004-09-06	0.688001	0.589939	0.781042	0.573713	0.438137	0.747325	0.69355	0.632525	0.623932	0.996586
2004-09-07	0.68508	0.588102	0.781042	0.57035	0.435773	0.74549	0.689664	0.636163	0.627644	0.996586
2004-09-08	0.682897	0.585529	0.781042	0.563624	0.432622	0.743655	0.68599	0.636163	0.627644	0.996586
2004-09-09	0.679986	0.583325	0.778542	0.560286	0.427912	0.739985	0.682316	0.636163	0.627644	0.996586
2004-09-10	0.679986	0.581487	0.777917	0.556948	0.425557	0.73815	0.680549	0.636163	0.627644	0.996586
2004-09-11	0.67853	0.580385	0.777292	0.55361	0.422444	0.73448	0.678006	0.636163	0.627644	0.996586
2004-09-12	0.675627	0.57818	0.776667	0.546933	0.419339	0.73081	0.672918	0.636163	0.627644	0.996586
2004-09-13	0.673451	0.575241	0.774167	0.543618	0.41547	0.727141	0.669809	0.636163	0.627644	0.996586
2004-09-14	0.671275	0.573404	0.773542	0.540304	0.412389	0.723471	0.667478	0.633981	0.625417	0.996586
2004-09-15	0.669105	0.570831	0.772917	0.536989	0.410078	0.719801	0.664141	0.631576	0.623141	0.996586
2004-09-16	0.666216	0.568994	0.772292	0.533674	0.408543	0.717966	0.659116	0.62873	0.620769	0.996586
2004-09-17	0.66405	0.566422	0.770417	0.530359	0.404721	0.716131	0.658111	0.625883	0.618398	0.996586
2004-09-18	0.661889	0.564217	0.769792	0.527068	0.402428	0.714296	0.657106	0.625883	0.618398	0.996586
2004-09-19	0.659012	0.562013	0.769792	0.523776	0.400152	0.710626	0.655096	0.624934	0.617607	0.996586
2004-09-20	0.656854	0.559808	0.768542	0.520485	0.39713	0.708791	0.651344	0.623985	0.616816	0.996586
2004-09-21	0.654701	0.557971	0.765417	0.517194	0.393357	0.705121	0.647592	0.623036	0.616026	0.996586
2004-09-22	0.651117	0.557971	0.764792	0.513902	0.391108	0.703286	0.644844	0.623036	0.616026	0.996586
2004-09-23	0.648253	0.557971	0.761042	0.510635	0.392608	0.701452	0.643102	0.623036	0.616026	0.996586
2004-09-24	0.645398	0.555766	0.760417	0.507369	0.385865	0.697782	0.641359	0.623036	0.616026	0.996586
2004-09-25	0.643257	0.553194	0.756042	0.502469	0.384377	0.695947	0.638745	0.625883	0.618398	0.996586
2004-09-26	0.641118	0.551357	0.756042	0.499202	0.380658	0.694112	0.635395	0.625883	0.618398	0.996586
2004-09-27	0.638273	0.549152	0.755417	0.495947	0.378432	0.692277	0.632984	0.624934	0.617607	0.996586
2004-09-28	0.63614	0.545845	0.754167	0.491082	0.37548	0.690442	0.630573	0.624934	0.617607	0.996586
2004-09-29	0.633301	0.544375	0.751042	0.487838	0.373265	0.688607	0.626754	0.624934	0.617607	0.965502
2004-09-30	0.630468	0.541803	0.750417	0.484595	0.369601	0.686772	0.62528	0.624934	0.617607	0.953226
2004-10-01	0.627635	0.539378	0.749167	0.481352	0.365226	0.684937	0.623069	0.624934	0.617607	0.930375
2004-10-02	0.625518	0.537393	0.746042	0.481352	0.362326	0.683102	0.62062	0.624934	0.617607	0.833635
2004-10-03	0.623401	0.534968	0.746042	0.478132	0.360879	0.679433	0.617696	0.624934	0.617607	0.833635
2004-10-04	0.620578	0.532249	0.745417	0.474912	0.357262	0.677599	0.614771	0.624934	0.617607	0.822632
2004-10-05	0.617767	0.530044	0.744792	0.473302	0.355109	0.675765	0.612821	0.624934	0.617607	0.755972
2004-10-06	0.615659	0.527472	0.743542	0.471692	0.355109	0.67393	0.610937	0.627781	0.619979	0.754052
2004-10-07	0.613551	0.525635	0.741667	0.471692	0.353674	0.67393	0.615746	0.629678	0.62156	0.72369
2004-10-08	0.613551	0.523798	0.775417	0.471692	0.358709	0.679433	0.614771	0.629678	0.62156	0.696321
2004-10-09	0.631884	0.52343	0.994792	0.471692	0.36305	0.677599	0.614771	0.629678	0.62156	0.656782
2004-10-10	0.629759	0.520858	0.953125	0.471692	0.362326	0.675765	0.610937	0.626832	0.619188	0.633159
2004-10-11	0.628343	0.518653	0.955208	0.470082	0.359432	0.67393	0.610937	0.623036	0.616026	0.600526
2004-10-12	0.628343	0.515714	0.922917	0.470082	0.358709	0.675765	0.610937	0.610066	0.605221	0.592186
2004-10-13	0.627635	0.513877	0.869583	0.470082	0.359432	0.677599	0.609117	0.610889	0.605906	0.596414
2004-10-14	0.625518	0.511304	0.872917	0.471692	0.358709	0.675765	0.607297	0.609244	0.604536	0.610323
2004-10-15	0.624106	0.508732	0.872917	0.473302	0.355827	0.67393	0.603658	0.608421	0.603851	0.608534
2004-10-16	0.622695	0.506895	0.872917	0.473302	0.356545	0.670262	0.601903	0.60064	0.597368	0.605091
2004-10-17	0.620578	0.504323	0.867083	0.473302	0.355827	0.668428	0.601058	0.591403	0.589673	0.595892
2004-10-18	0.617064	0.502118	0.867083	0.473302	0.353674	0.664759	0.597679	0.57875	0.578319	0.57147
2004-10-19	0.615659	0.499546	0.867917	0.473302	0.350086	0.662925	0.595144	0.567247	0.567998	0.501888
2004-10-20	0.613551	0.498076	0.865417	0.473302	0.349378	0.66109	0.592739	0.557183	0.558966	0.502578
2004-10-21	0.61145	0.495137	0.862396	0.473302	0.346542	0.65742	0.591959	0.53734	0.54148	0.451007
2004-10-22	0.608649	0.492932	0.860938	0.473302	0.343707	0.65375	0.58884	0.53734	0.54148	0.443064
2004-10-23	0.606549	0.49036	0.859479	0.473302	0.34089	0.651915	0.58806	0.529864	0.534914	0.440351
2004-10-24	0.604457	0.487788	0.862396	0.473302	0.337375	0.65008	0.585785	0.527103	0.532489	0.436586
2004-10-25	0.601668	0.485583	0.855833	0.473302	0.335969	0.64641	0.584355	0.512127	0.524408	0.433081
2004-10-26	0.599577	0.483378	0.855833	0.473302	0.334575	0.644575	0.582926	0.500886	0.51885	0.430783
2004-10-27	0.596798	0.480806	0.855833	0.471692	0.332484	0.640906	0.580066	0.491388	0.513118	0.425198
2004-10-28	0.595409	0.478969	0.851458	0.471692	0.332484	0.639071	0.579351	0.482852	0.505756	0.424792
2004-10-29	0.59263	0.476764	0.848542	0.470082	0.328307	0.637236	0.576517	0.474106	0.500172	0.429516
2004-10-30	0.591138	0.474192	0.848542	0.468472	0.326234	0.635401	0.572738	0.48153	0.49444	0.428847
2004-10-31	0.589645	0.47162	0.848542	0.468472	0.322778	0.631731	0.569904	0.457861	0.461901	0.430789
2004-11-01	0.587655	0.469415	0.849271	0.468472	0.320722	0.629896	0.565495	0.450602	0.478521	0.462487
2004-11-02	0.585007	0.46721	0.849271	0.468472	0.318674	0.628061	0.561968	0.441385	0.470887	0.421241
2004-11-03	0.582358	0.464271	0.843437	0.466862	0.31731	0.624391	0.561087	0.429538	0.46509	0.420148
2004-11-04	0.57814	0.462434	0.843437	0.466862	0.313909	0.622556	0.557812	0.418407	0.459775	0.417722
2004-11-05	0.576768	0.46023	0.843437	0.465252	0.311203	0.620721	0.554537	0.410362	0.452032	0.412928
2004-11-06	0.57471	0.45729	0.843437	0.463655	0.307155	0.618886	0.552143	0.402036	0.446083	0.41567
2004-11-07	0.572651	0.455085	0.842708	0.463655	0.304472	0.615217	0.549876	0.389774	0.439378	0.408511
2004-11-08	0.570598	0.452145	0.836875	0.463655	0.30246	0.613382	0.547609	0.380256	0.43324	0.42338
2004-11-09	0.567864	0.448838	0.836875	0.462057	0.301128	0.611547	0.544649	0.37174	0.426318	0.424164
2004-11-10	0.565813	0.446633	0.833229	0.462057	0.29848	0.607877	0.541877	0.360719	0.418294	0.426859
2004-11-11	0.564448	0.443326	0.831042	0.462057	0.296494	0.606042	0.538413	0.350701	0.410915	0.426393
2004-11-12	0.561726	0.441121	0.828854	0.462057	0.29517	0.604207	0.53567	0.341934	0.403674	0.426254
2004-11-13	0.559003	0.438549	0.828854	0.462057	0.291234	0.602372	0.533841	0.298501	0.397083	0.415669
2004-11-14	0.556968	0.43561	0.826667	0.462057	0.28861	0.598702	0.532011	0.325459	0.389205	0.36693
2004-11-15	0.555612	0.433038	0.826667	0.462057	0.287959	0.596867	0.530182	0.318309	0.383127	0.490058
2004-11-16	0.557645	0.431935	0.826667	0.462057	0.284058	0.596867	0.527561	0.311279	0.376959	0.386318
2004-11-17	0.557645	0.431568	0.836875	0.463655	0.283408	0.598702	0.525853	0.302353	0.370837	0.390125
2004-11-18	0.55629	0.430833	0.833229	0.463655	0.281463	0.596867	0.522439	0.294056	0.364452	0.394125
2004-11-19	0.554935	0.429363	0.834688	0.463655	0.27953	0.593197	0.519147	0.286793	0.358482	0.361695
2004-11-20	0.553579	0.426791	0.834688	0.463655	0.277597	0.591362	0.515976	0.279708	0.354742	0.396903
2004-11-21	0.553579	0.426423	0.85	0.466862	0.275664	0.591362	0.515184	0.271701	0.349636	0.358905
2004-11-22	0.552902	0.425689	0.853646	0.466862	0.273757	0.589528	0.512074	0.265504	0.347262	0.399471
2004-11-23	0.552902	0.424954	0.860938	0.466862	0.272486	0.587693	0.509147	0.257613	0.348053	0.380305
2004-11-24	0.554257	0.423484	0.865417	0.466862	0.272486	0.584023	0.506952	0.246019	0.348449	0.366258
2004-11-25	0.558323	0.423484	0.872083	0.466862	0.271851	0.582188	0.504818	0.232491	0.348845	0.342743
2004-11-26	0.559003	0.424219	0.88125	0.466862	0.268049	0.580353	0.502136	0.228626	0.348845	0.31929
2004-11-27	0.559003	0.423116	0.88375	0.465252	0.269308	0.578518	0.500124	0.220359	0.348845	0.29193
2004-11-28	0.558323	0.421647	0.887083	0.465252	0.271215	0.574848	0.497013	0.211856	0.348845	0.273829
2004-11-29	0.556968	0.420912	0.882083	0.463655	0.271215	0.573013	0.49436	0.206344	0.348845	0.247611
2004-11-30	0.555612	0.418707	0.882083	0.462057	0.271215	0.571178	0.490823	0.195859	0.348845	0.227128
2004-12-01	0.554257	0.417237	0.87875	0.460459	0.271215	0.569402	0.488287	0.184993	0.348845	0.218283
2004-12-02	0.552224	0.414665	0.87875	0.460459	0.271215	0.567625	0.486636	0.172868	0.348845	0.20707
2004-12-03	0.550871	0.412828	0.87875	0.458862	0.26679	0.567625	0.483335	0.162291	0.348845	0.181591
2004-12-04	0.549521	0.411005	0.87875	0.457264	0.26553	0.565849	0.481684	0.155205	0.348053	0.196048
2004-12-05	0.547496	0.408828	0.87875	0.455667	0.26553	0.564072	0.478618	0.149168	0.347658	0.185549
2004-12-06	0.544795	0.406605	0.87875	0.455667	0.264901	0.562296	0.477085	0.138145	0.347658	0.170138
2004-12-07	0.544123	0.404009	0.87875	0.452471	0.263641	0.562296	0.474785	0.118461	0.346867	0.160139
2004-12-08	0.544795	0.402172	0.88125	0.450874	0.26553	0.560519	0.472604	0.0817192	0.346471	0.172666
2004-12-09	0.542779	0.399967	0.88125	0.449276	0.26616	0.558743	0.471189	0.0680293	0.341212	0.182675
2004-12-10	0.541435	0.39813	0.88125	0.449276	0.26616	0.556966	0.468358	0.0680293	0.334024	0.189771
2004-12-11	0.54009	0.395558	0.88125	0.449276	0.267419	0.55519	0.466295	0.0680293	0.327537	0.193989
2004-12-12	0.538074	0.392986	0.88125	0.449276	0.263011	0.553413	0.464998	0.0623427	0.321118	0.203007
2004-12-13	0.536065	0.391884	0.88125	0.449276	0.259268	0.551637	0.462403	0.0623427	0.312441	0.212558
2004-12-14	0.534726	0.388944	0.88125	0.449276	0.259268	0.548086	0.459603	0.0637117	0.305232	0.221161
2004-12-15	0.532717	0.386739	0.87875	0.446103	0.256773	0.54631	0.457895	0.0642593	0.298979	0.230423
2004-12-16	0.531378	0.3838	0.87875	0.446103	0.252468	0.544534	0.453624	0.0656705	0.291395	0.234271
2004-12-17	0.529377	0.381228	0.875417	0.444516	0.251853	0.542758	0.451118	0.0662602	0.285507	0.238872
2004-12-18	0.528043	0.378656	0.875417	0.444516	0.251237	0.540982	0.448726	0.0668499	0.279852	0.243326
2004-12-19	0.526042	0.376819	0.875417	0.44293	0.250622	0.53743	0.447131	0.0674396	0.271826	0.247483
2004-12-20	0.524708	0.374246	0.87125	0.441343	0.249398	0.535655	0.443942	0.0680293	0.263929	0.251815
2004-12-21	0.523381	0.371674	0.87125	0.441343	0.251237	0.533878	0.440981	0.066555	0.259171	0.205857
2004-12-22	0.523381	0.370205	0.870417	0.44293	0.251237	0.535655	0.442461	0.0650808	0.254095	0.212715
2004-12-23	0.530044	0.379023	0.887083	0.455667	0.251853	0.53743	0.443202	0.0999372	0.252333	0.346698
2004-12-24	0.532048	0.383432	0.889583	0.455667	0.251853	0.539206	0.443942	0.102601	0.246417	0.331524
2004-12-25	0.531378	0.384167	0.89125	0.455667	0.251237	0.53743	0.442461	0.0723469	0.240785	0.386799
2004-12-26	0.530711	0.384535	0.887917	0.455667	0.250622	0.535655	0.44024	0.0888168	0.233777	0.343699
2004-12-27	0.52871	0.384167	0.887917	0.455667	0.253083	0.533878	0.438019	0.0817192	0.226716	0.297377
2004-12-28	0.527376	0.383432	0.887917	0.455667	0.253083	0.532102	0.435855	0.0711885	0.220511	0.279898
2004-12-29	0.526042	0.381595	0.89125	0.455667	0.252468	0.532102	0.435855	0.0787706	0.214488	0.286239
2004-12-30	0.524708	0.381228	0.89375	0.458862	0.252468	0.530325	0.434488	0.0817192	0.209504	0.291584
2004-12-31	0.522717	0.380125	0.89375	0.458862	0.253698	0.530325	0.433805	0.0848784	0.20532	0.293279
2005-01-01	0.520726	0.379391	0.89375	0.460459	0.256158	0.528549	0.433121	0.0874268	0.200188	0.299342
2005-01-02	0.518735	0.378656	0.907083	0.463655	0.252468	0.528549	0.432438	0.0902069	0.197051	0.32653
2005-01-03	0.516749	0.377186	0.907083	0.463655	0.245113	0.526772	0.431071	0.0964621	0.19288	0.352255
2005-01-04	0.515427	0.376819	0.90375	0.463655	0.252468	0.526772	0.430388	0.0975046	0.188996	0.339082
2005-01-05	0.514105	0.377186	0.907917	0.465252	0.253698	0.524995	0.429704	0.0981997	0.1854	0.315842
2005-01-06	0.512783	0.377553	0.90875	0.465252	0.251237	0.524995	0.428451	0.0988947	0.182724	0.292298
2005-01-07	0.511461	0.376819	0.909583	0.466862	0.253083	0.523219	0.427198	0.0992422	0.176328	0.272813
2005-01-08	0.509485	0.376451	0.909583	0.466862	0.253083	0.521442	0.427198	0.0995897	0.169528	0.249327
2005-01-09	0.507509	0.375716	0.909583	0.466862	0.253083	0.519666	0.425945	0.094516	0.163926	0.246406
2005-01-10	0.505534	0.374981	0.909583	0.466862	0.253083	0.517889	0.424066	0.0938674	0.154628	0.245569
2005-01-11	0.50422	0.373512	0.90625	0.466862	0.253083	0.516113	0.42344	0.0932187	0.151147	0.197745
2005-01-12	0.502253	0.372042	0.90625	0.466862	0.253083	0.514336	0.421791	0.092014	0.144988	0.183354
2005-01-13	0.500286	0.371674	0.90625	0.466862	0.253083	0.51256	0.419319	0.0874268	0.135799	0.159676
2005-01-14	0.49832	0.369837	0.90625	0.465252	0.253083	0.510783	0.417671	0.0832988	0.126289	0.166935
2005-01-15	0.497014	0.368735	0.90625	0.465252	0.253083	0.509007	0.416023	0.0787706	0.114668	0.171972
2005-01-16	0.501597	0.375349	0.93125	0.465252	0.253083	0.509007	0.416023	0.0747689	0.10493	0.180926
2005-01-17	0.530711	0.41687	1	0.466862	0.262388	0.51256	0.420967	0.0747689	0.101219	0.202006
2005-01-18	0.554257	0.447736	1	0.500835	0.341593	0.526772	0.437279	0.066555	0.103051	0.544873
2005-01-19	0.561726	0.459127	1	0.512269	0.407779	0.533878	0.443202	0.0774016	0.10093	0.677026
2005-01-20	0.563768	0.462434	1	0.515548	0.419339	0.533878	0.444739	0.0750217	0.0973152	0.670836
2005-01-21	0.564448	0.463903	0.997917	0.515548	0.423996	0.533878	0.445537	0.0735053	0.0927739	0.650575
2005-01-22	0.565129	0.465006	1	0.515548	0.429482	0.533878	0.447929	0.0711885	0.0883183	0.637772
2005-01-23	0.571282	0.469783	1	0.522131	0.431837	0.533878	0.446334	0.0747689	0.0959068	0.618026
2005-01-24	0.573337	0.471987	1	0.525422	0.431837	0.533878	0.445537	0.0742635	0.0934701	0.600602
2005-01-25	0.572651	0.472722	1	0.527068	0.426342	0.533878	0.444739	0.0760326	0.0914743	0.572101
2005-01-26	0.573337	0.473457	1	0.530359	0.424772	0.533878	0.443942	0.169403	0.123365	0.647931
2005-01-27	0.572651	0.47162	1	0.532017	0.425557	0.53743	0.443942	0.200085	0.138207	0.689455
2005-01-28	0.578827	0.476397	0.989583	0.536989	0.450066	0.53743	0.445537	0.208076	0.151147	0.689493
2005-01-29	0.6504	0.520123	1	0.546933	0.481621	0.539206	0.451915	0.225084	0.157252	0.672419
2005-01-30	0.675627	0.559073	0.99375	0.556948	0.503916	0.560519	0.461106	0.226855	0.160385	0.684137
2005-01-31	0.696783	0.57818	0.96875	0.561955	0.531737	0.565849	0.464998	0.249561	0.166128	0.718379
2005-02-01	0.704134	0.583692	0.982292	0.565306	0.535146	0.567625	0.466943	0.241187	0.171702	0.69981
2005-02-02	0.706343	0.588102	0.998958	0.568669	0.531737	0.569402	0.468358	0.243603	0.172064	0.650539
2005-02-03	0.708557	0.588469	0.982292	0.602485	0.549717	0.585858	0.485811	0.251494	0.173987	0.760355
2005-02-04	0.717435	0.589204	1	0.692639	0.663512	0.659255	0.556993	0.25552	0.197914	0.912239
2005-02-05	0.771533	0.622274	0.979167	0.712121	0.780863	0.683102	0.611847	0.259417	0.18304	0.957423
2005-02-06	0.787584	0.645861	0.994792	0.71745	0.799842	0.688607	0.623069	0.270851	0.18609	0.968286
2005-02-07	0.79604	0.65597	0.947917	0.721014	0.813959	0.695947	0.632984	0.272126	0.1875	0.974312
2005-02-08	0.802211	0.664484	0.939583	0.728167	0.820022	0.699617	0.636198	0.273401	0.188996	0.977456
2005-02-09	0.808399	0.66874	0.900417	0.728167	0.820022	0.701452	0.640488	0.277405	0.190492	0.995535
2005-02-10	0.811498	0.672465	0.872917	0.728167	0.81699	0.703286	0.643102	0.279708	0.191671	0.999465
2005-02-11	0.81616	0.67619	0.882917	0.728167	0.813959	0.706956	0.649468	0.282188	0.193685	0.999465
2005-02-12	0.819272	0.679914	0.869583	0.728167	0.80891	0.706956	0.654158	0.28318	0.198777	0.999465
2005-02-13	0.822388	0.683107	0.90625	0.729955	0.80891	0.712461	0.658111	0.289982	0.198777	0.999465
2005-02-14	0.834113	0.69162	0.939583	0.729955	0.839414	0.732645	0.678854	0.298501	0.199861	0.999945
2005-02-15	0.857774	0.728335	0.958333	0.75151	0.88817	0.784722	0.702595	0.311279	0.243334	0.999945
2005-02-16	0.868115	0.745362	1	0.793313	0.906089	0.799753	0.718951	0.468921	0.270046	0.999945
2005-02-17	0.87611	0.753343	0.963542	0.802494	0.91033	0.811028	0.717466	0.522962	0.296984	0.999945
2005-02-18	0.880125	0.758132	0.984375	0.809838	0.907149	0.8223	0.720501	0.541366	0.307692	0.999228
2005-02-19	0.886813	0.764517	0.994792	0.819078	0.903969	0.833571	0.723601	0.554019	0.316165	0.999465
2005-02-20	0.889486	0.76771	1	0.824621	0.902908	0.841086	0.726765	0.574724	0.324452	0.999465
2005-02-21	0.892159	0.77037	1	0.828317	0.9008	0.846721	0.730122	0.585364	0.332201	0.999465
2005-02-22	0.893774	0.771434	1	0.830177	0.898691	0.850478	0.732641	0.594883	0.342264	0.999465
2005-02-23	0.894498	0.771966	1	0.830177	0.895528	0.852357	0.735224	0.582776	0.350427	0.999465
2005-02-24	0.895223	0.772499	1	0.830177	0.892364	0.854236	0.737936	0.582776	0.356145	0.999465
2005-02-25	0.895223	0.772499	1	0.830177	0.885025	0.857993	0.737936	0.58709	0.362942	0.999465
2005-02-26	0.893774	0.773031	1	0.830177	0.879794	0.857993	0.73884	0.588815	0.371827	0.999465
2005-02-27	0.894498	0.773031	1	0.830177	0.873538	0.859871	0.740648	0.582776	0.37804	0.999465
2005-02-28	0.910053	0.786333	0.985417	0.832038	0.870413	0.865507	0.74336	0.582776	0.427702	0.999465
2005-03-01	0.917402	0.796443	0.99375	0.839478	0.864174	0.867386	0.744328	0.582776	0.462964	0.999465
2005-03-02	0.929712	0.808149	1	0.845059	0.871452	0.873021	0.751109	0.582776	0.491723	0.999465
2005-03-03	0.953716	0.83635	0.984375	0.875056	0.917764	0.901205	0.768389	0.632525	0.523297	0.999945
2005-03-04	0.97211	0.861358	0.989583	0.907243	0.948815	0.927506	0.783838	0.632525	0.556128	0.999945
2005-03-05	0.97884	0.870936	1	0.920597	0.957444	0.935021	0.788851	0.585364	0.584254	0.999465
2005-03-06	0.984743	0.876789	1	0.928262	0.962862	0.938778	0.79637	0.636163	0.626902	0.999465
2005-03-07	1	0.886367	1	0.93594	0.967197	0.952113	0.801249	0.723897	0.709477	0.999465
2005-03-08	1	0.902862	1	0.947493	0.967197	0.957859	0.804563	0.765493	0.752973	0.999465
2005-03-09	1	0.911908	1	0.95522	0.968286	0.959775	0.807877	0.785011	0.761394	0.999465
2005-03-10	1	0.916025	1	0.957151	0.968286	0.96169	0.809684	0.80357	0.777511	0.999465
2005-03-11	1	0.916996	1	0.957151	0.967197	0.965521	0.8133	0.807441	0.804803	0.999465
2005-03-12	1	0.92116	1	0.959083	0.963946	0.965521	0.8133	0.815537	0.812834	0.999465
2005-03-13	1	0.922318	1	0.959083	0.959611	0.963606	0.814203	0.824336	0.821595	0.999465
2005-03-14	1	0.922896	1	0.961015	0.953127	0.963606	0.816011	0.829897	0.836197	0.999465
2005-03-15	1	0.925743	1	0.9649	0.950971	0.965521	0.818873	0.851754	0.852259	0.999465
2005-03-16	1	0.92734	1	0.968786	0.94666	0.967437	0.820831	0.866252	0.865797	0.999465
2005-03-17	0.997452	0.928404	1	0.970729	0.941282	0.967437	0.820831	0.874862	0.87517	0.999465
2005-03-18	0.996603	0.929468	1	0.970729	0.934833	0.969352	0.820831	0.88097	0.88737	0.999465
2005-03-19	0.995754	0.93	1	0.970729	0.926281	0.971268	0.82181	0.891641	0.902277	0.999465
2005-03-20	0.994055	0.93	1	0.970729	0.915637	0.971268	0.82181	0.901385	0.918036	0.999465
2005-03-21	0.992356	0.93	1	0.970729	0.905029	0.969352	0.820831	0.930182	0.930007	0.999465
2005-03-22	0.991507	0.93	1	0.970729	0.894473	0.969352	0.819852	0.935557	0.938493	0.99779
2005-03-23	0.989816	0.93	1	0.970729	0.883976	0.969352	0.818873	0.941317	0.944175	0.968035
2005-03-24	0.988971	0.93	1	0.970729	0.87458	0.967437	0.818873	0.944772	0.947585	0.970779
2005-03-25	0.988125	0.928936	1	0.970729	0.865214	0.967437	0.819852	0.948868	0.950706	0.95983
2005-03-26	0.98728	0.928936	1	0.970729	0.854852	0.967437	0.818873	0.952452	0.951555	0.938287
2005-03-27	0.985589	0.928936	1	0.970729	0.845576	0.965521	0.817894	0.954244	0.953252	0.913642
2005-03-28	0.984743	0.928936	1	0.970729	0.836347	0.965521	0.804563	0.954244	0.954949	0.89501
2005-03-29	0.983898	0.928404	1	0.970729	0.825118	0.965521	0.803734	0.95514	0.955798	0.890833
2005-03-30	0.98221	0.927872	1	0.970729	0.814969	0.965521	0.80622	0.963856	0.962972	0.86385
2005-03-31	0.981367	0.927872	1	0.970729	0.803872	0.965521	0.80622	0.970047	0.9676	0.846436
2005-04-01	0.979682	0.926807	1	0.970729	0.796837	0.965521	0.805391	0.971106	0.969606	0.835783
2005-04-02	0.977997	0.926275	1	0.970729	0.791828	0.96169	0.804563	0.9764	0.977629	0.816665
2005-04-03	0.976312	0.925211	1	0.968786	0.785842	0.959775	0.803734	0.979821	0.980869	0.796731
2005-04-04	0.97547	0.925211	1	0.968786	0.778874	0.957859	0.802906	0.983242	0.984109	0.786435
2005-04-05	0.974627	0.924632	1	0.968786	0.772917	0.955944	0.802077	0.990242	0.990743	0.774468
2005-04-06	0.97211	0.922318	1	0.966843	0.766986	0.954028	0.801249	0.993898	0.994214	0.761099
2005-04-07	0.97211	0.922318	1	0.966843	0.761081	0.952113	0.800421	0.993898	0.994214	0.718636
2005-04-08	0.970432	0.921739	1	0.9649	0.756173	0.952113	0.799592	0.993898	0.994214	0.637463
2005-04-09	0.968754	0.92116	1	0.9649	0.74931	0.950197	0.798518	0.993898	0.994214	0.622715
2005-04-10	0.967075	0.920582	1	0.9649	0.745409	0.950197	0.798518	0.993898	0.996529	0.56091
2005-04-11	0.965401	0.919424	0.998958	0.9649	0.740532	0.948282	0.79637	0.997554	0.997686	0.506473
2005-04-12	0.963729	0.917482	0.998958	0.962958	0.735685	0.948282	0.79637	0.997554	0.997686	0.482107
2005-04-13	0.961222	0.916025	0.998958	0.962958	0.729874	0.946366	0.795295	0.993898	0.997686	0.436807
2005-04-14	0.961222	0.916025	0.995833	0.962958	0.724093	0.944451	0.795295	0.993898	0.994214	0.427112
2005-04-15	0.959551	0.916025	0.995833	0.962958	0.717359	0.942535	0.793147	0.992679	0.993057	0.399785
2005-04-16	0.958715	0.916025	0.99375	0.962958	0.711595	0.942535	0.793147	0.992679	0.993057	0.375293
2005-04-17	0.957047	0.91554	0.99375	0.962958	0.707776	0.940656	0.793147	0.989023	0.989586	0.357335
2005-04-18	0.954548	0.915054	0.991667	0.962958	0.702047	0.940656	0.790999	0.985523	0.986269	0.323094
2005-04-19	0.952883	0.915054	0.991667	0.962958	0.693507	0.938778	0.789925	0.982102	0.983029	0.327734
2005-04-20	0.95205	0.914568	0.991667	0.962958	0.686899	0.938778	0.788851	0.978681	0.979789	0.335183
2005-04-21	0.949552	0.914568	0.991667	0.962958	0.68219	0.935021	0.786846	0.974282	0.975623	0.343171
2005-04-22	0.947893	0.914036	0.988542	0.962958	0.675629	0.933142	0.78484	0.96687	0.968603	0.354251
2005-04-23	0.946235	0.913504	0.988542	0.962958	0.667235	0.931264	0.78484	0.959946	0.962046	0.353139
2005-04-24	0.944576	0.913504	0.988542	0.962958	0.661655	0.931264	0.781833	0.95514	0.957495	0.357429
2005-04-25	0.942917	0.91244	0.986458	0.962958	0.655156	0.929385	0.779828	0.947972	0.950706	0.359057
2005-04-26	0.941259	0.911376	0.983333	0.962958	0.648698	0.929385	0.778825	0.937861	0.940766	0.362063
2005-04-27	0.939608	0.910844	0.983333	0.962958	0.64318	0.925628	0.777782	0.925881	0.928947	0.363635
2005-04-28	0.937131	0.911376	0.983333	0.962958	0.635852	0.923749	0.774651	0.914823	0.918036	0.373652
2005-04-29	0.93548	0.90978	0.983333	0.962958	0.630387	0.921871	0.773607	0.904763	0.908111	0.386831
2005-04-30	0.934655	0.910844	0.989583	0.9649	0.625838	0.921871	0.773607	0.901385	0.904778	0.393749
2005-05-01	0.93548	0.914036	0.991667	0.9649	0.620391	0.921871	0.772563	0.893849	0.897263	0.39934
2005-05-02	0.934655	0.914568	0.992708	0.9649	0.615877	0.919992	0.77152	0.886122	0.889452	0.402024
2005-05-03	0.933004	0.915054	0.9875	0.9649	0.608687	0.918114	0.768389	0.875819	0.879038	0.404931
2005-05-04	0.932181	0.915054	0.9875	0.9649	0.606895	0.916235	0.767642	0.870079	0.873236	0.413102
2005-05-05	0.929712	0.914568	0.98125	0.9649	0.605102	0.916235	0.766896	0.861836	0.864905	0.422387
2005-05-06	0.928889	0.914568	0.983333	0.9649	0.604206	0.914356	0.766149	0.853373	0.85635	0.432651
2005-05-07	0.927243	0.914568	0.98125	0.962958	0.604206	0.912478	0.765403	0.847214	0.850069	0.441453
2005-05-08	0.925597	0.914568	0.982292	0.962958	0.59884	0.912478	0.765403	0.838766	0.841307	0.449196
2005-05-09	0.923955	0.914568	0.979167	0.962958	0.594388	0.910599	0.764656	0.830882	0.83313	0.461784
2005-05-10	0.922317	0.914036	0.979167	0.961015	0.590833	0.906842	0.764656	0.823421	0.825391	0.473312
2005-05-11	0.919859	0.914036	0.971875	0.959083	0.588179	0.904964	0.763909	0.814692	0.816338	0.479266
2005-05-12	0.918221	0.91244	0.971875	0.959083	0.585526	0.903084	0.762416	0.809764	0.811227	0.481773
2005-05-13	0.916583	0.910312	0.971875	0.957151	0.583757	0.901205	0.761669	0.80165	0.802654	0.482078
2005-05-14	0.91495	0.908715	0.9625	0.95522	0.580227	0.899326	0.759347	0.792179	0.792052	0.480839
2005-05-15	0.912502	0.908183	0.9625	0.95522	0.575819	0.897447	0.757772	0.785011	0.784029	0.47895
2005-05-16	0.91087	0.907119	0.9625	0.953288	0.573183	0.893688	0.756197	0.778356	0.77658	0.478973
2005-05-17	0.908421	0.906055	0.955208	0.951356	0.571438	0.88993	0.754621	0.770549	0.76784	0.477767
2005-05-18	0.905983	0.904991	0.955208	0.951356	0.567074	0.88805	0.753046	0.763381	0.759818	0.478579
2005-05-19	0.904357	0.903394	0.947917	0.949425	0.563588	0.886171	0.751109	0.752374	0.747704	0.475454
2005-05-20	0.902732	0.902862	0.947917	0.949425	0.560979	0.884293	0.748203	0.743415	0.737868	0.397238
2005-05-21	0.900294	0.900202	0.947917	0.949425	0.556629	0.882414	0.744328	0.735096	0.728735	0.464284
2005-05-22	0.900294	0.900202	0.951042	0.953288	0.553173	0.880536	0.741552	0.727417	0.720304	0.485253
2005-05-23	0.89812	0.899138	0.951042	1	0.551445	0.899326	0.74336	0.730488	0.723677	0.516148
2005-05-24	0.896672	0.897009	0.952083	1	0.554037	0.903084	0.745297	0.732792	0.726206	0.555655
2005-05-25	0.895223	0.896477	0.942917	0.990221	0.558369	0.904964	0.746266	0.735096	0.728735	0.5713
2005-05-26	0.893774	0.895413	0.942917	0.988266	0.559239	0.903084	0.748203	0.73676	0.730561	0.584578
2005-05-27	0.892159	0.894349	0.942917	0.988266	0.560979	0.903084	0.75014	0.737592	0.731475	0.595925
2005-05-28	0.889486	0.892753	0.942917	0.984354	0.561849	0.903084	0.749171	0.739256	0.733301	0.601355
2005-05-29	0.887704	0.891688	0.937083	0.980443	0.561849	0.901205	0.749171	0.740088	0.734215	0.608129
2005-05-30	0.885922	0.890624	0.93625	0.976557	0.563588	0.899326	0.749171	0.742583	0.736955	0.618674
2005-05-31	0.883337	0.88956	0.93625	0.972672	0.565328	0.897447	0.749171	0.745207	0.739835	0.624772
2005-06-01	0.880928	0.888496	0.93625	0.968786	0.566201	0.895567	0.748203	0.745207	0.739835	0.631476
2005-06-02	0.879322	0.8869	0.93625	0.9649	0.567947	0.893688	0.749171	0.755254	0.750865	0.64574
2005-06-03	0.877716	0.885303	0.930417	0.961015	0.566201	0.891809	0.748203	0.760054	0.756134	0.673612
2005-06-04	0.875311	0.883707	0.927083	0.957151	0.569692	0.88993	0.748203	0.761974	0.758242	0.68587
2005-06-05	0.872912	0.882111	0.927083	0.953288	0.567947	0.886171	0.748203	0.763381	0.759818	0.692624
2005-06-06	0.870513	0.879982	0.927083	0.949425	0.568819	0.884293	0.747234	0.764085	0.760606	0.69916
2005-06-07	0.868914	0.878386	0.927083	0.941698	0.569692	0.880536	0.747234	0.765493	0.762182	0.708468
2005-06-08	0.866522	0.876257	0.92625	0.93594	0.570565	0.878657	0.747234	0.765493	0.762182	0.714096
2005-06-09	0.864134	0.873597	0.925417	0.932101	0.570565	0.876778	0.746266	0.764789	0.761394	0.720848
2005-06-10	0.861745	0.872	0.920417	0.928262	0.572311	0.8749	0.745297	0.764789	0.761394	0.729366
2005-06-11	0.85936	0.870404	0.91875	0.922504	0.571438	0.871143	0.745297	0.765493	0.762182	0.734017
2005-06-12	0.858567	0.86934	0.922083	0.918689	0.573183	0.869264	0.745297	0.767605	0.764545	0.741648
2005-06-13	0.856982	0.867211	0.920417	0.914874	0.574056	0.867386	0.744328	0.768309	0.765333	0.752353
2005-06-14	0.85381	0.865615	0.91875	0.911058	0.576701	0.865507	0.744328	0.768309	0.765333	0.758551
2005-06-15	0.852225	0.864019	0.912083	0.903428	0.576701	0.86175	0.74336	0.769013	0.766121	0.763474
2005-06-16	0.849855	0.862955	0.912083	0.899637	0.577583	0.859871	0.74336	0.769013	0.766121	0.768938
2005-06-17	0.847486	0.860294	0.912083	0.893951	0.579346	0.857993	0.742456	0.769013	0.766121	0.77535
2005-06-18	0.844327	0.858166	0.904583	0.888265	0.580227	0.854236	0.739744	0.769013	0.766121	0.77334
2005-06-19	0.841967	0.856037	0.904583	0.882591	0.577583	0.850478	0.739744	0.769781	0.766981	0.763995
2005-06-20	0.840395	0.853909	0.904583	0.878823	0.570565	0.8486	0.73884	0.770549	0.76784	0.770895
2005-06-21	0.838035	0.852312	0.904583	0.875056	0.563588	0.846721	0.73884	0.770549	0.76784	0.775844
2005-06-22	0.835679	0.849652	0.902083	0.871289	0.557499	0.844843	0.737936	0.771317	0.7687	0.778808
2005-06-23	0.83333	0.846459	0.899583	0.867522	0.549717	0.842964	0.736128	0.772085	0.76956	0.781138
2005-06-24	0.830981	0.843267	0.897917	0.863766	0.541982	0.839207	0.735224	0.772085	0.76956	0.784533
2005-06-25	0.827852	0.840606	0.89375	0.861894	0.534294	0.837328	0.73432	0.772853	0.770419	0.786395
2005-06-26	0.826291	0.838478	0.889583	0.860022	0.527487	0.83545	0.732641	0.774388	0.772138	0.787762
2005-06-27	0.823949	0.834753	0.892917	0.856279	0.522391	0.831693	0.730962	0.774388	0.772138	0.790769
2005-06-28	0.820828	0.832093	0.885417	0.850663	0.5148	0.829814	0.729283	0.774388	0.772138	0.795003
2005-06-29	0.818494	0.830497	0.885417	0.848791	0.507255	0.826057	0.727604	0.775156	0.772998	0.802962
2005-06-30	0.815382	0.827304	0.882917	0.845059	0.502252	0.824178	0.725925	0.775924	0.773858	0.805808
2005-07-01	0.813048	0.825176	0.882917	0.841339	0.498093	0.820421	0.724376	0.775924	0.773858	0.806481
2005-07-02	0.809949	0.821451	0.874583	0.837618	0.493958	0.816664	0.722826	0.776692	0.774717	0.806033
2005-07-03	0.807624	0.818791	0.874583	0.833898	0.490654	0.814786	0.721276	0.776692	0.774717	0.810617
2005-07-04	0.805299	0.815598	0.874583	0.830177	0.480801	0.812907	0.718951	0.778356	0.77658	0.81312
2005-07-05	0.811498	0.815598	0.887917	0.837618	0.493958	0.812907	0.718951	0.787699	0.787038	0.881744
2005-07-06	0.809174	0.815066	0.895417	0.833898	0.489002	0.811028	0.718177	0.792179	0.792052	0.888679
2005-07-07	0.806849	0.812937	0.89625	0.830177	0.484082	0.80727	0.716046	0.793075	0.793055	0.892634
2005-07-08	0.804527	0.810809	0.89625	0.826469	0.479984	0.805391	0.714625	0.793971	0.794058	0.895036
2005-07-09	0.802983	0.808149	0.89125	0.822774	0.475081	0.803511	0.713204	0.79493	0.795132	0.897408
2005-07-10	0.799895	0.805488	0.890417	0.819078	0.471819	0.799753	0.712494	0.79493	0.795132	0.898185
2005-07-11	0.797579	0.802828	0.889583	0.815382	0.466139	0.797874	0.711074	0.79493	0.795132	0.899402
2005-07-12	0.794501	0.799635	0.884583	0.811686	0.462101	0.794115	0.708954	0.79493	0.795132	0.901595
2005-07-13	0.792193	0.796443	0.884583	0.806166	0.459684	0.792236	0.705774	0.79493	0.795132	0.903317
2005-07-14	0.789118	0.794314	0.884583	0.802494	0.455663	0.790357	0.702595	0.79589	0.796207	0.904929
2005-07-15	0.786817	0.791122	0.882917	0.798822	0.451665	0.7866	0.699486	0.79589	0.796207	0.906213
2005-07-16	0.784517	0.788993	0.882917	0.795149	0.446873	0.784722	0.696518	0.79589	0.796207	0.907843
2005-07-17	0.784517	0.786333	0.874583	0.791477	0.442094	0.780965	0.69355	0.79589	0.796207	0.909024
2005-07-18	0.782216	0.784204	0.872917	0.787829	0.438137	0.777207	0.690583	0.79589	0.796207	0.91019
2005-07-19	0.779924	0.781544	0.86875	0.784182	0.434985	0.775329	0.687827	0.79493	0.795132	0.911816
2005-07-20	0.777633	0.777819	0.86875	0.780534	0.427912	0.771572	0.685071	0.79493	0.795132	0.914012
2005-07-21	0.774577	0.775691	0.867917	0.776886	0.420892	0.769693	0.682316	0.79493	0.795132	0.915529
2005-07-22	0.772294	0.772499	0.860938	0.773239	0.416241	0.765936	0.681397	0.793971	0.794058	0.917524
2005-07-23	0.769251	0.769838	0.860208	0.769613	0.413159	0.764057	0.679701	0.793971	0.794058	0.91923
2005-07-24	0.76621	0.766645	0.853646	0.765988	0.407779	0.7603	0.678006	0.793971	0.794058	0.920918
2005-07-25	0.763934	0.763453	0.852917	0.762362	0.404721	0.758422	0.67631	0.793971	0.794058	0.921448
2005-07-26	0.761659	0.761325	0.854375	0.758737	0.402428	0.754665	0.672918	0.793971	0.794058	0.921448
2005-07-27	0.759384	0.758132	0.854375	0.755111	0.397885	0.750995	0.670587	0.793971	0.794058	0.928529
2005-07-28	0.756363	0.754939	0.847812	0.74971	0.394863	0.747325	0.668255	0.793971	0.794058	0.921978
2005-07-29	0.753341	0.752279	0.847083	0.744309	0.391108	0.74549	0.6667	0.793971	0.794058	0.922508
2005-07-30	0.751077	0.748554	0.846354	0.737107	0.387359	0.74182	0.665146	0.793971	0.794058	0.923137
2005-07-31	0.748819	0.745362	0.846354	0.733531	0.383634	0.73815	0.662131	0.793075	0.793055	0.923667
2005-08-01	0.74656	0.742169	0.839792	0.729955	0.380658	0.736315	0.659116	0.80261	0.793055	0.923667
2005-08-02	0.743552	0.739509	0.839063	0.724591	0.37548	0.732645	0.657106	0.793075	0.793055	0.923667
2005-08-03	0.740552	0.735252	0.836146	0.719226	0.371789	0.728976	0.655096	0.793075	0.793055	0.924296
2005-08-04	0.738303	0.731527	0.834688	0.715674	0.368872	0.725306	0.65322	0.792179	0.792052	0.924826
2005-08-05	0.736055	0.727803	0.833958	0.712121	0.364496	0.721636	0.651344	0.792179	0.792052	0.924826
2005-08-06	0.733066	0.724078	0.831771	0.708568	0.361603	0.717966	0.64853	0.792179	0.792052	0.923568
2005-08-07	0.730077	0.720886	0.825208	0.705015	0.355827	0.719801	0.64853	0.792179	0.792052	0.923568
2005-08-08	0.728585	0.717161	0.827396	0.701463	0.352957	0.717966	0.646654	0.793971	0.794058	0.925455
2005-08-09	0.725608	0.7145	0.825208	0.697933	0.34796	0.714296	0.645716	0.793971	0.794058	0.923568
2005-08-10	0.723375	0.71184	0.819375	0.694404	0.343707	0.710626	0.643973	0.793971	0.794058	0.923568
2005-08-11	0.720402	0.708115	0.818646	0.690875	0.339484	0.706956	0.64223	0.792179	0.792052	0.924826
2005-08-12	0.718177	0.705455	0.816458	0.687345	0.334575	0.701452	0.639616	0.790387	0.790046	0.925455
2005-08-13	0.71521	0.702794	0.810625	0.683816	0.331787	0.697782	0.637002	0.789491	0.789044	0.923568
2005-08-14	0.71299	0.698538	0.810625	0.68031	0.328307	0.695947	0.636198	0.786803	0.786035	0.925397
2005-08-15	0.710035	0.694813	0.80625	0.675051	0.326234	0.692277	0.634591	0.786803	0.786035	0.925397
2005-08-16	0.707818	0.691088	0.798229	0.669792	0.321404	0.688607	0.632984	0.786803	0.786035	0.928646
2005-08-17	0.705607	0.688428	0.798229	0.666287	0.316627	0.684937	0.631376	0.786803	0.786035	0.929328
2005-08-18	0.702662	0.684703	0.7975	0.661066	0.313233	0.681267	0.629769	0.786803	0.786035	0.930009
2005-08-19	0.700453	0.682043	0.791667	0.655845	0.307826	0.679433	0.628965	0.786803	0.786035	0.93069
2005-08-20	0.697517	0.67885	0.791042	0.648884	0.303802	0.677599	0.628228	0.785907	0.785032	0.933016
2005-08-21	0.695317	0.675126	0.788542	0.645426	0.299804	0.679433	0.628228	0.785011	0.784029	0.932746
2005-08-22	0.693117	0.671401	0.788542	0.643696	0.296494	0.677599	0.628228	0.785011	0.784029	0.933839
2005-08-23	0.690193	0.669273	0.787292	0.640238	0.29189	0.675765	0.627491	0.785011	0.784029	0.935201
2005-08-24	0.687271	0.665548	0.783542	0.636779	0.28861	0.672096	0.626017	0.785011	0.784029	0.935612
2005-08-25	0.68508	0.660759	0.782292	0.633321	0.28861	0.668428	0.62528	0.784179	0.783098	0.936942
2005-08-26	0.682169	0.657034	0.777292	0.62644	0.284058	0.666593	0.624543	0.784179	0.783098	0.937386
2005-08-27	0.679986	0.654906	0.772917	0.623005	0.280819	0.664759	0.623806	0.784179	0.783098	0.93812
2005-08-28	0.677077	0.65331	0.769792	0.619571	0.276308	0.66109	0.623069	0.783348	0.782167	0.93812
2005-08-29	0.674901	0.647989	0.771667	0.614419	0.273757	0.65742	0.622332	0.783348	0.782167	0.937386
2005-08-30	0.672726	0.645328	0.771667	0.609305	0.269944	0.655585	0.62062	0.781684	0.780304	0.916741
2005-08-31	0.669828	0.641604	0.766042	0.605895	0.26616	0.651915	0.619646	0.775156	0.772998	0.881036
2005-09-01	0.666939	0.637879	0.763542	0.60419	0.262388	0.648245	0.619646	0.767605	0.764545	0.82739
2005-09-02	0.663327	0.634154	0.760417	0.60078	0.258021	0.644575	0.616721	0.762677	0.75903	0.766716
2005-09-03	0.661889	0.630356	0.759167	0.60078	0.253698	0.640906	0.616721	0.758134	0.754026	0.696195
2005-09-04	0.661169	0.628521	0.757917	0.602485	0.250622	0.639071	0.616721	0.752374	0.747704	0.602104
2005-09-05	0.66045	0.625949	0.759167	0.60078	0.247562	0.635401	0.615746	0.749687	0.744753	0.575671
2005-09-06	0.657573	0.623744	0.757917	0.599075	0.243901	0.631731	0.613796	0.743415	0.737868	0.515419
2005-09-07	0.655418	0.622642	0.757292	0.599075	0.240899	0.629896	0.612821	0.74092	0.732388	0.454535
2005-09-08	0.653267	0.620437	0.754167	0.597371	0.237302	0.626226	0.611847	0.735096	0.728735	0.392757
2005-09-09	0.6504	0.618232	0.753542	0.597371	0.234315	0.624391	0.610027	0.728953	0.72199	0.361033
2005-09-10	0.648253	0.61566	0.751042	0.593984	0.22899	0.620721	0.608207	0.725305	0.717986	0.341623
2005-09-11	0.645398	0.613088	0.751042	0.592291	0.224887	0.618886	0.605477	0.719342	0.711543	0.322849
2005-09-12	0.642543	0.610516	0.749792	0.590598	0.220807	0.617051	0.603658	0.712095	0.704311	0.279921
2005-09-13	0.640407	0.607944	0.744792	0.588905	0.217922	0.615217	0.603658	0.699466	0.691707	0.279719
2005-09-14	0.638273	0.606107	0.744167	0.588905	0.213895	0.611547	0.603658	0.693185	0.685439	0.280877
2005-09-15	0.635428	0.603167	0.737917	0.585518	0.210468	0.609712	0.602748	0.683109	0.675383	0.280952
2005-09-16	0.634009	0.60133	0.737917	0.585518	0.207638	0.609712	0.603658	0.675517	0.667806	0.284722
2005-09-17	0.631176	0.599493	0.736667	0.585518	0.204264	0.607877	0.603658	0.675517	0.667806	0.470247
2005-09-18	0.629051	0.59692	0.736667	0.583825	0.20092	0.606042	0.601903	0.66758	0.659706	0.487941
2005-09-19	0.626223	0.594716	0.736667	0.583825	0.19759	0.602372	0.601058	0.658188	0.650121	0.632484
2005-09-20	0.625518	0.592144	0.734792	0.583825	0.195946	0.600537	0.600213	0.653757	0.645599	0.540352
2005-09-21	0.621989	0.590306	0.734167	0.602485	0.195399	0.598702	0.600213	0.70616	0.698388	0.99028
2005-09-22	0.620578	0.587367	0.734167	0.605895	0.194851	0.600537	0.601058	0.705194	0.697423	0.954914
2005-09-23	0.61847	0.585897	0.734167	0.60419	0.194303	0.598702	0.599368	0.700363	0.692602	0.930163
2005-09-24	0.616361	0.58406	0.727917	0.60419	0.193756	0.595032	0.599368	0.691391	0.683648	0.843159
2005-09-25	0.614253	0.582222	0.726042	0.602485	0.193208	0.593197	0.598523	0.68725	0.679515	0.853333
2005-09-26	0.61285	0.57965	0.726667	0.602485	0.19266	0.591362	0.598523	0.683109	0.675383	0.818377
2005-09-27	0.61075	0.577078	0.726667	0.602485	0.192116	0.589528	0.597679	0.677035	0.669322	0.771428
2005-09-28	0.608649	0.575608	0.721667	0.60078	0.190481	0.587693	0.596834	0.670556	0.662744	0.719204
2005-09-29	0.606549	0.573404	0.721667	0.60078	0.164145	0.585858	0.595989	0.662818	0.654846	0.666758
2005-09-30	0.608649	0.573036	0.739167	0.599075	0.142343	0.582188	0.595144	0.66004	0.652011	0.647091
2005-10-01	0.606549	0.571199	0.737292	0.593984	0.1223	0.578518	0.595144	0.659114	0.651066	0.653465
2005-10-02	0.605154	0.568627	0.737292	0.590598	0.106944	0.576683	0.594299	0.659114	0.651066	0.667427
2005-10-03	0.604457	0.566789	0.736667	0.585518	0.0961017	0.574848	0.594299	0.663744	0.655791	0.672127
2005-10-04	0.603063	0.565687	0.741042	0.585518	0.064801	0.573013	0.593519	0.66467	0.656736	0.676617
2005-10-05	0.600971	0.563115	0.736042	0.577076	0.0373664	0.571178	0.593519	0.66467	0.656736	0.681137
2005-10-06	0.598882	0.560543	0.736042	0.572032	0.00761796	0.569402	0.592739	0.663744	0.655791	0.650495
2005-10-07	0.596798	0.557603	0.735417	0.566987	0	0.567625	0.591179	0.658188	0.650121	0.615195
2005-10-08	0.594714	0.555399	0.730417	0.560286	0	0.565849	0.58962	0.655476	0.647354	0.584651
2005-10-09	0.592133	0.553194	0.729167	0.556948	0	0.562296	0.58728	0.650317	0.642089	0.579786
2005-10-10	0.59064	0.550254	0.730417	0.55361	0	0.560519	0.585785	0.64615	0.637837	0.562732
2005-10-11	0.58865	0.548417	0.724167	0.551941	0	0.558743	0.58507	0.642976	0.634597	0.558387
2005-10-12	0.587655	0.545845	0.705417	0.550272	0	0.55519	0.58364	0.639801	0.631357	0.550052
2005-10-13	0.585007	0.544008	0.724167	0.550272	0	0.553413	0.581496	0.627781	0.619979	0.542486
2005-10-14	0.582358	0.54217	0.692917	0.550272	0	0.549861	0.580066	0.621264	0.61455	0.534491
2005-10-15	0.579709	0.538716	0.715417	0.550272	0	0.548086	0.579351	0.610066	0.605221	0.507601
2005-10-16	0.57814	0.538055	0.715417	0.550272	0	0.544534	0.580066	0.605954	0.601795	0.50942
2005-10-17	0.576082	0.536181	0.715417	0.550272	0	0.542758	0.579351	0.594883	0.592572	0.504924
2005-10-18	0.573337	0.53416	0.709167	0.550272	0	0.539206	0.574627	0.58709	0.585802	0.51144
2005-10-19	0.571965	0.532617	0.709167	0.550272	0	0.53743	0.569904	0.574724	0.574707	0.492848
2005-10-20	0.571282	0.532249	0.704167	0.550272	0	0.535655	0.566377	0.567247	0.567998	0.487268
2005-10-21	0.569231	0.531514	0.704167	0.548602	0	0.533878	0.56285	0.565177	0.56614	0.481637
2005-10-22	0.56718	0.529677	0.703542	0.546933	0	0.532102	0.559449	0.559081	0.560669	0.478715
2005-10-23	0.565129	0.528575	0.703542	0.545276	0	0.528549	0.556174	0.552294	0.554613	0.468964
2005-10-24	0.562407	0.527105	0.699792	0.545276	0	0.526772	0.552899	0.545392	0.548551	0.45866
2005-10-25	0.560365	0.525268	0.699792	0.545276	0	0.524995	0.549876	0.539756	0.543602	0.448647
2005-10-26	0.559003	0.52343	0.694167	0.543618	0	0.523219	0.546853	0.533602	0.538197	0.441358
2005-10-27	0.55629	0.521593	0.694167	0.541961	0	0.521442	0.543956	0.527793	0.533096	0.434874
2005-10-28	0.554257	0.520123	0.689792	0.541961	0	0.519666	0.541185	0.522962	0.528853	0.421625
2005-10-29	0.551546	0.517551	0.688542	0.540304	0	0.516113	0.539799	0.518533	0.524963	0.423912
2005-10-30	0.551546	0.516816	0.688542	0.538646	0	0.514336	0.538413	0.484175	0.521814	0.424054
2005-10-31	0.55629	0.519021	0.712917	0.540304	0	0.517889	0.540492	0.464889	0.517367	0.44177
2005-11-01	0.564448	0.524533	0.744167	0.541961	0	0.514336	0.539106	0.440118	0.514501	0.454182
2005-11-02	0.562407	0.525268	0.745417	0.541961	0	0.51256	0.537499	0.416974	0.508967	0.453155
2005-11-03	0.561045	0.525268	0.745417	0.541961	0	0.509007	0.536584	0.396752	0.502544	0.45454
2005-11-04	0.560365	0.524165	0.745417	0.541961	0	0.50723	0.53567	0.383261	0.496614	0.461577
2005-11-05	0.559003	0.524165	0.742292	0.541961	0	0.50723	0.534755	0.37174	0.491179	0.462117
2005-11-06	0.559003	0.526003	0.741667	0.541961	0	0.50723	0.533841	0.350701	0.487556	0.458263
2005-11-07	0.559003	0.526737	0.737292	0.541961	0	0.505454	0.532011	0.333382	0.483932	0.450805
2005-11-08	0.557645	0.527105	0.737292	0.540304	0.00033389	0.503677	0.530182	0.327971	0.48055	0.454699
2005-11-09	0.55629	0.526737	0.731042	0.538646	0.00166945	0.501901	0.528414	0.327971	0.48055	0.460885
2005-11-10	0.554257	0.525635	0.731042	0.535331	0.00251882	0.500124	0.526707	0.330676	0.48055	0.46715
2005-11-11	0.552902	0.525268	0.732292	0.532017	0.00319831	0.498348	0.525	0.330676	0.48055	0.474459
2005-11-12	0.550871	0.524165	0.731667	0.528713	0.00391295	0.496573	0.523293	0.333382	0.48055	0.478956
2005-11-13	0.548846	0.522695	0.731667	0.527068	0.00463931	0.494797	0.521585	0.333382	0.48055	0.484109
2005-11-14	0.548171	0.523063	0.731667	0.523776	0.00722549	0.494797	0.519939	0.333382	0.48055	0.493254
2005-11-15	0.548171	0.5249	0.739792	0.520485	0.00938992	0.493021	0.518354	0.334541	0.48055	0.542501
2005-11-16	0.547496	0.526737	0.741667	0.517194	0.0107841	0.491245	0.516769	0.335121	0.48055	0.56178
2005-11-17	0.546145	0.527472	0.739792	0.513902	0.0135196	0.489469	0.515184	0.335121	0.48055	0.57121
2005-11-18	0.54547	0.527105	0.742292	0.512269	0.0145886	0.491245	0.515184	0.331217	0.481227	0.604273
2005-11-19	0.546145	0.527105	0.742917	0.512269	0.0211932	0.489469	0.512806	0.33686	0.481227	0.63098
2005-11-20	0.548846	0.52784	0.761667	0.512269	0.0248543	0.489469	0.510611	0.33802	0.484657	0.723811
2005-11-21	0.568547	0.557603	0.786667	0.517194	0.0414199	0.489469	0.510611	0.339179	0.487556	0.78875
2005-11-22	0.573337	0.56532	0.795312	0.517194	0.0474241	0.489469	0.506952	0.33973	0.487556	0.801081
2005-11-23	0.574024	0.568259	0.796771	0.515548	0.0508655	0.489469	0.504818	0.341383	0.486106	0.809856
2005-11-24	0.578827	0.572669	0.811354	0.520485	0.058006	0.491245	0.504818	0.345291	0.490454	0.850472
2005-11-25	0.584124	0.57818	0.815729	0.517194	0.0679612	0.491245	0.505489	0.349498	0.49444	0.850472
2005-11-26	0.604457	0.587734	0.899583	0.522131	0.103125	0.501901	0.505489	0.438465	0.534914	0.999203
2005-11-27	0.61005	0.594348	0.912083	0.527068	0.116056	0.509007	0.504818	0.438465	0.545723	0.977875
2005-11-28	0.607949	0.59692	0.91375	0.527068	0.122748	0.50723	0.504818	0.440118	0.550067	0.940617
2005-11-29	0.61145	0.599125	0.917083	0.533674	0.127317	0.50723	0.505489	0.446454	0.551582	0.9141
2005-11-30	0.61145	0.600962	0.912083	0.536989	0.129617	0.50723	0.504818	0.454116	0.553097	0.871274
2005-12-01	0.61145	0.601697	0.912917	0.540304	0.132387	0.50723	0.504818	0.460856	0.553097	0.793521
2005-12-02	0.61215	0.601697	0.910417	0.543618	0.136631	0.505454	0.504818	0.466502	0.553855	0.730299
2005-12-03	0.614253	0.60133	0.900417	0.546933	0.146209	0.509007	0.505489	0.472378	0.55537	0.664763
2005-12-04	0.617767	0.603535	0.899583	0.548602	0.163126	0.514336	0.507684	0.477563	0.556128	0.626576
2005-12-05	0.619172	0.604269	0.89125	0.550272	0.167214	0.514336	0.508416	0.482852	0.556128	0.536312
2005-12-06	0.619875	0.605004	0.882917	0.550272	0.171338	0.514336	0.507684	0.487782	0.556128	0.482029
2005-12-07	0.619875	0.605739	0.88375	0.550272	0.177108	0.514336	0.507684	0.499203	0.556128	0.439624
2005-12-08	0.619172	0.606107	0.884583	0.550272	0.180798	0.51256	0.507684	0.512127	0.55537	0.424717
2005-12-09	0.619875	0.607209	0.882917	0.550272	0.181326	0.51256	0.506952	0.519799	0.557831	0.417262
2005-12-10	0.619875	0.607944	0.882917	0.546933	0.186141	0.51256	0.506952	0.526413	0.558966	0.405211
2005-12-11	0.619172	0.608311	0.882917	0.545276	0.188302	0.51256	0.506221	0.529864	0.558399	0.376052
2005-12-12	0.619172	0.609046	0.882917	0.541961	0.189936	0.510783	0.505489	0.535097	0.558399	0.355191
2005-12-13	0.619172	0.609781	0.882917	0.540304	0.192116	0.509007	0.504818	0.540561	0.558399	0.365186
2005-12-14	0.61847	0.610149	0.882917	0.536989	0.193756	0.509007	0.504818	0.540561	0.558399	0.373431
2005-12-15	0.61847	0.610149	0.882917	0.536989	0.196494	0.50723	0.504148	0.548843	0.558399	0.381349
2005-12-16	0.61847	0.609046	0.872917	0.535331	0.198694	0.505454	0.503477	0.55655	0.558399	0.391239
2005-12-17	0.622695	0.609414	0.88125	0.535331	0.205389	0.505454	0.504148	0.563797	0.564901	0.443208
2005-12-18	0.626929	0.611618	0.89375	0.536989	0.22023	0.514336	0.510611	0.57875	0.578319	0.490197
2005-12-19	0.657573	0.625581	1	0.661066	0.44289	0.686772	0.633787	0.591403	0.589673	0.868137
2005-12-20	0.679986	0.642668	0.939583	0.699698	0.529186	0.743655	0.659116	0.604436	0.60053	0.83516
2005-12-21	0.68581	0.648521	0.910417	0.705015	0.534294	0.754665	0.665146	0.614179	0.608647	0.869047
2005-12-22	0.688732	0.651181	0.920417	0.706792	0.546273	0.7603	0.669809	0.617721	0.611598	0.999203
2005-12-23	0.690923	0.654906	0.922917	0.713897	0.551445	0.765936	0.672141	0.621264	0.61455	0.866094
2005-12-24	0.691653	0.657034	0.920417	0.715674	0.555765	0.765936	0.675462	0.630627	0.62235	0.909058
2005-12-25	0.694583	0.659695	0.920417	0.715674	0.559239	0.771572	0.678006	0.632525	0.623932	0.911666
2005-12-26	0.697517	0.662355	0.920417	0.71745	0.565328	0.771572	0.680549	0.636891	0.628387	0.916359
2005-12-27	0.701189	0.670337	0.922083	0.719226	0.568819	0.77345	0.682316	0.638346	0.629872	0.937415
2005-12-28	0.705607	0.681511	0.92375	0.719226	0.574056	0.779086	0.68599	0.644563	0.636217	0.998588
2005-12-29	0.707818	0.691088	0.925417	0.719226	0.575819	0.784722	0.685071	0.652897	0.644721	0.999203
2005-12-30	0.710774	0.694813	0.92625	0.722802	0.575819	0.788479	0.688746	0.696774	0.68902	0.999203
2005-12-31	0.711512	0.698006	0.947917	0.726379	0.579346	0.792236	0.692561	0.743415	0.737868	0.999203
2006-01-01	0.718919	0.704923	0.930417	0.728167	0.580227	0.809149	0.696518	0.792179	0.792052	0.999203
2006-01-02	0.721886	0.707051	0.92625	0.733531	0.584641	0.812907	0.698496	0.839822	0.842403	0.999203
2006-01-03	0.72263	0.710244	0.925417	0.735319	0.584641	0.816664	0.699486	0.873905	0.877104	0.999203
2006-01-04	0.72263	0.710244	0.92625	0.737107	0.585526	0.820421	0.701535	0.907451	0.910763	0.999203
2006-01-05	0.72263	0.710776	0.927083	0.737107	0.584641	0.820421	0.702595	0.908373	0.911672	0.999203
2006-01-06	0.72263	0.710776	0.92375	0.737107	0.582872	0.8223	0.703655	0.912059	0.915309	0.999203
2006-01-07	0.72263	0.709712	0.924583	0.738908	0.581109	0.8223	0.705774	0.947076	0.949858	0.999203
2006-01-08	0.72263	0.708647	0.917917	0.742508	0.589064	0.8223	0.708954	0.960924	0.962972	0.999203
2006-01-09	0.726352	0.724078	0.932917	0.744309	0.593498	0.826057	0.714625	0.947076	0.949858	0.999203
2006-01-10	0.741302	0.737912	0.932917	0.744309	0.609583	0.833571	0.720501	0.971106	0.972615	0.999203
2006-01-11	0.755607	0.748554	0.915417	0.755111	0.63312	0.86175	0.736128	0.993898	0.994214	0.999203
2006-01-12	0.76621	0.7576	0.932917	0.769613	0.681252	0.897447	0.759347	0.993898	0.994214	0.999203
2006-01-13	0.770012	0.76771	0.929583	0.787829	0.710641	0.927506	0.776738	0.999992	1	0.999203
2006-01-14	0.782216	0.777819	0.939583	0.828317	0.728911	0.942535	0.786846	0.999992	1	0.999203
2006-01-15	0.79604	0.790058	0.942917	0.830177	0.739563	0.940656	0.793147	0.999992	1	0.999203
2006-01-16	0.799895	0.797507	0.932917	0.830177	0.746384	0.936899	0.797444	0.999992	1	0.999203
2006-01-17	0.802983	0.800699	0.927083	0.830177	0.750286	0.940656	0.799592	0.999992	1	0.999203
2006-01-18	0.804527	0.802296	0.927083	0.832038	0.751267	0.944451	0.801249	0.999992	1	0.999203
2006-01-19	0.805299	0.803892	0.930417	0.833898	0.755191	0.946366	0.802906	0.999992	1	0.999203
2006-01-20	0.831764	0.822515	0.932917	0.854407	0.77391	0.957859	0.811492	0.999992	1	0.999203
2006-01-21	0.840395	0.832625	0.90375	0.861894	0.785842	0.96169	0.815107	0.999992	1	0.999203
2006-01-22	0.845906	0.83901	0.912917	0.865638	0.793832	0.931264	0.8133	0.999992	1	0.999203
2006-01-23	0.849855	0.845927	0.895417	0.869405	0.796837	0.927506	0.816915	0.999992	1	0.999203
2006-01-24	0.85381	0.853909	0.915417	0.873173	0.802864	0.923749	0.818873	0.999992	1	0.999203
2006-01-25	0.856189	0.859762	0.917083	0.873173	0.804879	0.923749	0.820831	0.999992	1	0.999203
2006-01-26	0.860949	0.866147	0.889583	0.87694	0.819011	0.927506	0.82279	0.999992	1	0.999203
2006-01-27	0.862541	0.869872	0.915417	0.87694	0.821041	0.929385	0.82776	0.999992	1	0.999203
2006-01-28	0.865726	0.870936	0.920417	0.878823	0.832258	0.931264	0.835141	0.999992	1	0.999203
2006-01-29	0.867318	0.873065	0.912917	0.878823	0.838391	0.931264	0.83725	0.999992	1	0.999203
2006-01-30	0.869714	0.875193	0.915417	0.878823	0.846604	0.925628	0.83951	0.999992	1	0.999203
2006-01-31	0.872113	0.877854	0.88875	0.878823	0.855886	0.925628	0.84064	0.999992	1	0.999203
2006-02-01	0.875311	0.881579	0.882083	0.878823	0.867293	0.933142	0.844029	0.999992	1	0.999203
2006-02-02	0.882534	0.887964	0.882083	0.878823	0.887122	0.942535	0.849417	0.999992	1	0.999203
2006-02-03	0.889486	0.895413	0.895417	0.878823	0.899745	0.957859	0.853765	0.999992	1	0.999203
2006-02-04	0.896672	0.903394	0.895417	0.880707	0.914574	0.965521	0.859139	0.999992	1	0.999203
2006-02-05	0.904357	0.912972	0.932917	0.880707	0.929488	0.971268	0.859139	0.999992	1	0.999203
2006-02-06	0.91495	0.919424	0.902083	0.893951	0.957444	0.992338	0.879216	0.999992	1	0.999203
2006-02-07	0.933829	0.936917	0.89125	0.911058	0.983554	0.950197	0.898739	0.999992	1	0.999203
2006-02-08	0.941259	0.945963	0.892917	0.920597	0.970465	0.921871	0.907271	0.999992	1	0.999203
2006-02-09	0.947893	0.953412	0.877083	0.926343	0.974824	0.927506	0.911111	0.999992	1	0.999203
2006-02-10	0.955381	0.959266	0.836875	0.928262	0.991213	0.938778	0.916119	0.947076	0.949858	0.999203
2006-02-11	1	0.999174	0.820833	0.937859	1	0.942535	0.960005	0.91682	0.920006	0.972044
2006-02-12	1	1	0.887083	0.930182	1	0.904964	1	0.926957	0.930007	0.972044
2006-02-13	1	1	0.919583	0.922504	1	0.908721	1	0.937861	0.940766	0.969427
2006-02-14	1	1	0.932917	0.928262	1	0.908721	1	0.943621	0.946448	0.982178
2006-02-15	1	1	0.947917	0.93402	1	0.903084	1	0.944772	0.947585	0.984547
2006-02-16	1	1	0.96875	0.937859	1	0.899326	1	0.947076	0.949858	0.988154
2006-02-17	1	1	0.939583	0.941698	1	0.901205	1	0.947076	0.949858	0.992159
2006-02-18	1	1	0.948958	0.94363	1	0.925628	1	0.9764	0.977629	0.996586
2006-02-19	1	1	0.96875	0.957151	1	0.933142	1	0.999992	1	0.999203
2006-02-20	1	1	0.94375	0.951356	1	0.914356	1	0.999992	1	0.996586
2006-02-21	1	1	0.961458	0.957151	0.996705	0.906842	1	0.999992	1	0.996586
2006-02-22	1	1	0.963542	0.970729	0.996705	0.912478	1	0.999992	1	0.996586
2006-02-23	1	1	0.977083	0.980443	1	0.921871	1	0.999992	1	0.996586
2006-02-24	1	1	0.994792	0.992177	1	0.929385	1	0.999992	1	0.996586
2006-02-25	1	1	1	1	1	0.940656	1	0.999992	1	0.996586
2006-02-26	1	1	1	0.994133	1	0.921871	1	0.999992	1	0.996586
2006-02-27	1	1	0.994792	1	1	0.933142	1	0.999992	1	0.996586
2006-02-28	1	1	0.963542	0.998044	1	0.921871	1	0.999992	1	0.996586
2006-03-01	1	1	0.95	0.996089	0.997803	0.904964	1	0.995117	0.995371	0.996586
2006-03-02	1	1	0.959375	0.998044	0.996705	0.910599	1	0.999992	1	0.996586
2006-03-03	1	1	0.963542	1	1	0.918114	1	0.995117	0.995371	0.996586
2006-03-04	1	1	0.96875	1	0.998902	0.918114	1	0.993898	0.994214	0.996586
2006-03-05	1	1	0.973958	1	0.982462	0.906842	1	0.999992	1	0.996586
2006-03-06	1	1	0.976042	1	0.985739	0.906842	1	0.999992	1	0.996586
2006-03-07	1	1	0.978125	1	0.990115	0.910599	1	0.999992	1	0.996586
2006-03-08	1	1	0.99375	1	1	0.919992	1	0.999992	1	0.999945
2006-03-09	1	1	0.958333	1	1	0.914356	1	0.990242	0.990743	0.999945
2006-03-10	1	1	0.979167	1	1	0.916235	1	0.999992	1	0.999945
2006-03-11	1	1	0.989583	1	1	0.912478	1	0.999992	1	0.999945
2006-03-12	1	1	1	1	1	0.919992	1	0.999992	1	0.996586
2006-03-13	1	1	1	1	1	0.921871	1	0.999992	1	0.999945
2006-03-14	1	1	1	1	1	0.910599	1	0.999992	1	0.999945
2006-03-15	1	1	1	1	1	0.921871	1	0.999992	1	0.999945
2006-03-16	1	1	1	1	1	0.919992	1	0.999992	1	0.999945
2006-03-17	1	1	1	1	1	0.904964	1	0.999992	1	0.999945
2006-03-18	1	1	1	1	1	0.912478	1	0.999992	1	0.999945
2006-03-19	1	1	1	1	1	0.904964	1	0.999992	1	0.999945
2006-03-20	1	1	1	1	1	0.908721	1	0.999992	1	0.999945
2006-03-21	1	1	1	1	1	0.912478	1	0.999992	1	0.999945
2006-03-22	1	1	1	1	1	0.916235	1	0.999992	1	0.999945
2006-03-23	1	1	1	1	1	0.918114	1	0.999992	1	0.999945
2006-03-24	1	1	1	1	1	0.919992	1	0.999992	1	0.999945
2006-03-25	1	1	1	1	1	0.925628	1	0.999992	1	0.999945
2006-03-26	1	1	1	1	1	0.916235	1	0.999992	1	0.999945
2006-03-27	0.994055	1	1	1	1	0.918114	1	0.999992	1	0.999945
2006-03-28	0.992356	1	1	1	1	0.918114	1	0.999992	1	0.999945
2006-03-29	0.990662	1	1	1	1	0.919992	1	0.999992	1	0.999945
2006-03-30	0.989816	1	1	1	1	0.921871	1	0.999992	1	0.999945
2006-03-31	0.988971	1	1	1	1	0.931264	1	0.999992	1	0.999945
2006-04-01	0.988125	1	1	1	1	0.936899	1	0.999992	1	0.999945
2006-04-02	0.986434	1	1	1	1	0.940656	1	0.999992	1	0.999945
2006-04-03	0.988971	0.999941	1	1	1	0.940656	1	0.999992	1	0.999945
2006-04-04	0.983898	0.999912	1	1	1	0.942535	1	0.999992	1	0.999945
2006-04-05	0.98221	0.999882	1	1	1	0.944451	1	0.999992	1	0.999945
2006-04-06	0.980525	0.999794	1	1	1	0.944451	1	0.999992	1	0.999945
2006-04-07	0.97884	0.999765	1	1	1	0.944451	1	0.999992	1	0.999945
2006-04-08	0.977997	0.999706	1	1	1	0.944451	1	0.999992	1	0.999945
2006-04-09	0.976312	0.999174	1	1	1	0.946366	1	0.999992	1	0.999945
2006-04-10	0.974627	0.997578	1	1	1	0.946366	1	0.999992	1	0.999945
2006-04-11	0.972949	0.995981	1	1	1	0.946366	1	0.999992	1	0.999945
2006-04-12	0.97211	0.995981	1	1	1	0.946366	1	0.999992	1	0.999945
2006-04-13	0.960386	0.994917	1	0.998044	1	0.946366	1	0.999992	1	0.999945
[truncated: 6,521 more rows]
